# Supplementary material for: Peptide-catalyzed kinetic resolution of planar-chiral metallocenes
Source: Royal Society of Chemistry journal article supplement (doi:10.1039/c4cc03266g), 2014-01-01

Supporting Information

## Peptide-Catalyzed Kinetic Resolution of Planar-Chiral Metallocenes

Midori Akiyama, Kengo Akagawa, Hidetake Seino, and Kazuaki Kudo

|                                                                              |     |
|------------------------------------------------------------------------------|-----|
| General information                                                          | S2  |
| Preparation of peptide catalyst <b>9</b>                                     | S2  |
| Typical procedure for the kinetic resolution by hydrogenation                | S2  |
| Typical procedure for the kinetic resolution by the addition of nitromethane | S3  |
| Spectroscopic data for the compounds obtained by the kinetic resolution      | S3  |
| Procedure for the transformation into planar-chiral derivatives              | S7  |
| Preparation of substrates                                                    | S9  |
| Determination of the absolute configuration of the obtained compounds        | S12 |
| References                                                                   | S14 |
| <sup>1</sup> H and <sup>13</sup> C NMR spectra                               | S16 |
| HPLC traces                                                                  | S36 |

### General information.

$^1\text{H}$  and  $^{13}\text{C}$  NMR spectra were recorded at 400 and 100 MHz respectively on a JEOL JNM-LA400 spectrometer, and chemical shifts were referenced to internal tetramethylsilane (TMS,  $\delta = 0.0$  ppm) for  $^1\text{H}$  and the central line of  $\text{CDCl}_3$  ( $\delta = 77.0$  ppm) for  $^{13}\text{C}$ . High-resolution FAB mass measurements were performed on a JEOL JMS-600H mass spectrometer in a positive-ionization mode using 3-nitrobenzyl alcohol as a matrix. Polyethylene glycol 400 was added to the matrix as an internal mass calibrant. HPLC traces were recorded on a Shimadzu CLASS-VP system with a Chiralcel OD-H column (25 cm) and OD-H guard (1 cm), Chiralcel OJ-H column (25 cm) and OJ-H guard (1 cm), or Chiralpak AS-H column (25 cm) and AS-H guard (1 cm). For the peptide-catalyzed kinetic resolution, solvents were degassed by a repeated cycle of freeze-pump-thaw immediately before the reaction.

### Preparation of peptide catalyst 9.

The resin-supported peptide was synthesized according to the previous report.<sup>1</sup> As a resin, TentaGel S-NH<sub>2</sub> (AnaSpec, Inc., product number: 22798, 0.29 mmol/g amine loading) was used. The coupling reaction of an amino acid was performed with 3.0 equiv each of an *N*- $\alpha$ -9-fluorenylmethoxycarbonyl (Fmoc) amino acid, *O*-(7-azabenzotriazol-1-yl)-*N,N,N',N'*-tetramethyluronium hexafluorophosphate (HATU), and 1-hydroxy-7-azabenzotriazole (HOAt) along with 6.0 equiv of diisopropylethylamine in *N,N*-dimethylformamide (DMF) for 60 min. After washing the resin with DMF, the completion of the peptide bond formation was confirmed by the Kaiser test or the chloranil test. To remove the Fmoc group, the resin was soaked in 20% piperidine/DMF solution for 20 min and washed with DMF. This cycle, the coupling of an Fmoc-protected amino acid and removal of the Fmoc group, was repeated until an intended sequence was introduced on the resin. After the Fmoc group on the terminal prolyl residue was removed, the resin was washed with DMF and dichloromethane (DCM), and dried under reduced pressure. To convert the supported peptide to the salt of hydrogen chloride (HCl), the resin was soaked in 1,4-dioxane solution of HCl (4 M) for a few minutes. Then, the resin was washed successively with DCM, DMF, and DCM, and dried under reduced pressure.

### Typical procedure for the kinetic resolution by hydrogenation (Tables 1 and 2).

Water (666  $\mu\text{L}$ ) was added slowly at room temperature to a two-necked round-bottom flask that contained aldehyde **1a** (25  $\mu\text{mol}$ ), Hantzsch ester **3** (75  $\mu\text{mol}$ ), 20 mol% of resin-supported peptide, and THF (333  $\mu\text{L}$ ) with stirring by a magnetic stirrer under argon atmosphere. The mixture was stirred for 24 h at 30  $^\circ\text{C}$ . Then, the peptide catalyst was filtered off and washed with chloroform. After removal of the solvent under reduced pressure, the residue was purified by preparative TLC (hexanes/ethyl acetate 4:1) to afford starting material **1a** and product **2a**.

### Typical procedure for the kinetic resolution by the addition of nitromethane (Table 3).

Water (0.40 mL) was added dropwise over 10 min at 30 °C to a two-necked round-bottom flask that contained aldehyde **1** (30 μmol), resin-supported peptide **9** (30 mg, 6.0 μmol of the terminal prolyl group), and 1,4-dioxane (0.20 mL) with stirring at 180 rpm by a magnetic stirrer under argon atmosphere. Nitromethane (150 μmol) was added, and the resulting mixture was stirred for the given time. Then, the peptide catalyst was filtered off and washed with methanol and chloroform. After removal of the solvent under reduced pressure, the residue was purified by preparative TLC under nitrogen atmosphere using dichloromethane as eluent to afford starting material **1** and product **10**. The minor diastereomer of **10** was removed by preparative TLC using hexanes/ethyl acetate (4:1) as eluent for an HPLC analysis.

In Scheme 1, methanol was used instead of 1,4-dioxane as an organic co-solvent. The reaction was performed at 20 °C for 2 h.

### Spectroscopic data for the compounds obtained by the kinetic resolution.

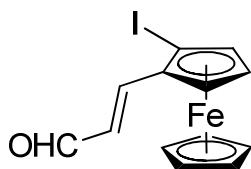

#### (*S<sub>p</sub>*)-3-(2-Iodoferrocenyl)prop-2-enal (**1a**).

<sup>1</sup>H NMR (CDCl<sub>3</sub>) δ 9.66 (d, *J* = 8.0 Hz, 1H), 7.51 (d, *J* = 15.6 Hz, 1H), 6.46 (dd, *J* = 15.6, 8.0 Hz, 1H), 4.81–4.77 (m, 1H), 4.71–4.67 (m, 1H), 4.65–4.61 (m, 1H), 4.23–4.13 (m, 5H); <sup>13</sup>C NMR (CDCl<sub>3</sub>) δ 193.11, 153.93, 127.55, 78.72, 78.21, 72.97, 72.42, 65.64, 46.45; HRMS (FAB) *m/z*: calculated for C<sub>13</sub>H<sub>11</sub>FeIO [M]<sup>+</sup>: 365.9204, found 365.9209. Enantiomeric excess was determined by HPLC analysis (Chiralcel OD-H, hexane/2-propanol 90:10, 1.0 mL min<sup>-1</sup>): *t<sub>R</sub>* = 10.6 min (minor), 12.6 min (major).

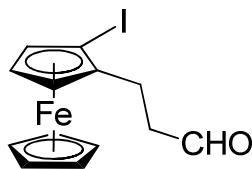

#### (*R<sub>p</sub>*)-3-(2-Iodoferrocenyl)propanal (**2a**).

<sup>1</sup>H NMR (CDCl<sub>3</sub>) δ 9.81 (s, 1H), 4.41–4.39 (m, 1H), 4.16–4.12 (m, 7H), 2.82–2.55 (m, 4H); <sup>13</sup>C NMR (CDCl<sub>3</sub>) δ 201.53, 88.14, 74.22, 71.58, 68.21, 67.10, 45.06, 44.75, 22.82; HRMS (FAB) *m/z*: calculated for C<sub>13</sub>H<sub>13</sub>FeIO [M]<sup>+</sup>: 367.9361, found 367.9360. Enantiomeric excess was determined by HPLC analysis (Chiralpak AS-H, hexane/2-propanol 90:10, 1.0 mL min<sup>-1</sup>): *t<sub>R</sub>* = 11.2 min (minor), 12.1 min (major).

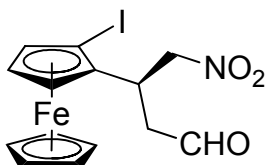

**(*S,R<sub>p</sub>*)-3-(2-Iodoferrocenyl)-4-nitrobutanal (10a).**

$^1\text{H}$  NMR ( $\text{CDCl}_3$ )  $\delta$  9.97 (s, 1H), 4.65 (dd,  $J = 12.2, 3.8$  Hz, 1H), 4.55–4.53 (m, 1H), 4.51 (dd,  $J = 12.2, 6.8$  Hz, 1H), 4.26 (brt,  $J = 2.0$  Hz 1H), 4.17–4.14 (m, 5H), 4.07–4.05 (m, 1H), 3.88–3.81 (m, 1H), 3.31 (dd,  $J = 18.8, 9.2$  Hz, 1H), 3.22 (dd,  $J = 18.8, 4.8$  Hz, 1H);  $^{13}\text{C}$  NMR ( $\text{CDCl}_3$ )  $\delta$  199.21, 87.59, 78.42, 75.07, 71.79, 69.07, 65.95, 45.23, 43.28, 32.61; HRMS (FAB)  $m/z$ : calculated for  $\text{C}_{14}\text{H}_{14}\text{FeINO}_3$   $[\text{M}]^+$ : 426.9368, found 426.9374. Enantiomeric excess was determined by HPLC analysis (Chiralcel OJ-H, hexane/2-propanol 70:30, 1.0 mL  $\text{min}^{-1}$ ):  $t_{\text{R}} = 49.5$  min (major), 57.6 min (minor).

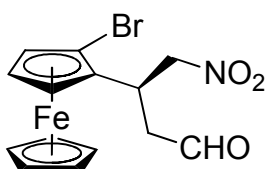

**(*S,R<sub>p</sub>*)-3-(2-Bromoferrocenyl)-4-nitrobutanal (10b).**

$^1\text{H}$  NMR ( $\text{CDCl}_3$ )  $\delta$  9.96 (s, 1H), 4.69 (dd,  $J = 11.9, 3.8$  Hz, 1H), 4.55 (dd,  $J = 11.9, 6.8$  Hz, 1H), 4.54–4.52 (m, 1H), 4.20–4.17 (m, 5H), 4.15 (brt,  $J = 2.6$  Hz 1H), 3.98–3.91 (m, 1H), 3.88–3.81 (m, 1H), 3.28 (dd,  $J = 18.8, 8.8$  Hz, 1H), 3.20 (dd,  $J = 18.8, 4.8$  Hz, 1H);  $^{13}\text{C}$  NMR ( $\text{CDCl}_3$ )  $\delta$  199.22, 85.17, 78.61, 78.15, 71.36, 70.64, 66.53, 65.44, 45.07, 31.29; HRMS (FAB)  $m/z$ : calculated for  $\text{C}_{14}\text{H}_{14}\text{BrFeNO}_3$   $[\text{M}]^+$ : 378.9506, found 378.9504. Enantiomeric excess was determined by HPLC analysis (Chiralcel OJ-H, hexane/2-propanol 70:30, 1.0 mL  $\text{min}^{-1}$ ):  $t_{\text{R}} = 47.8$  min (major), 52.9 min (minor).

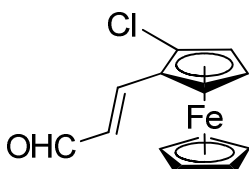

**(*S<sub>p</sub>*)-3-(2-Chloroferrocenyl)prop-2-enal (1c).**

$^1\text{H}$  NMR ( $\text{CDCl}_3$ )  $\delta$  9.65 (d,  $J = 8.0$  Hz, 1H), 7.62 (d,  $J = 15.6$  Hz, 1H), 6.49 (dd,  $J = 15.6, 8.0$  Hz, 1H), 4.77–4.73 (m, 1H), 4.59–4.55 (m, 1H), 4.47–4.43 (m, 1H), 4.30–4.19 (m, 5H);  $^{13}\text{C}$  NMR ( $\text{CDCl}_3$ )  $\delta$  193.23, 151.11, 127.53, 94.65, 74.99, 72.22, 71.26, 68.49, 64.77; HRMS (FAB)  $m/z$ : calculated for  $\text{C}_{13}\text{H}_{11}\text{ClFeO}$   $[\text{M}]^+$ : 273.9848, found 273.9842. Enantiomeric excess was determined

by HPLC analysis (Chiralcel OD-H, hexane/2-propanol 90:10, 1.0 mL min<sup>-1</sup>):  $t_R = 34.3$  min (minor), 37.1 min (major).

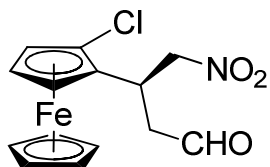

**(*S,R\_p*)-3-(2-Chloroferrocenyl)-4-nitrobutanal (10c).**

<sup>1</sup>H NMR (CDCl<sub>3</sub>)  $\delta$  9.95 (s, 1H), 4.70 (dd,  $J = 12.2, 3.8$  Hz, 1H), 4.56 (dd,  $J = 12.2, 6.8$  Hz, 1H), 4.51–4.49 (m, 1H), 4.21–4.18 (m, 5H), 4.08 (brt,  $J = 2.6$  Hz 1H), 3.98–3.81 (m, 2H), 3.25 (dd,  $J = 18.8, 8.4$  Hz, 1H), 3.18 (dd,  $J = 18.8, 4.8$  Hz, 1H); <sup>13</sup>C NMR (CDCl<sub>3</sub>)  $\delta$  199.15, 91.86, 83.87, 78.06, 71.00, 68.36, 65.09, 64.96, 45.11, 30.65; HRMS (FAB)  $m/z$ : calculated for C<sub>14</sub>H<sub>14</sub>ClFeNO<sub>3</sub> [M]<sup>+</sup>: 335.0012, found 335.0015. Enantiomeric excess was determined by HPLC analysis (Chiralcel OJ-H, hexane/2-propanol 70:30, 1.0 mL min<sup>-1</sup>):  $t_R = 48.9$  min (major), 53.7 min (minor).

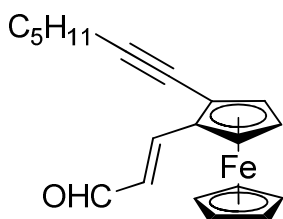

**(*S\_p*)-3-(2-Heptyn-1-ylferrocenyl)prop-2-enal (1d).**

<sup>1</sup>H NMR (CDCl<sub>3</sub>)  $\delta$  9.63 (d,  $J = 8.0$  Hz, 1H), 7.61 (d,  $J = 16.0$  Hz, 1H), 6.57 (dd,  $J = 16.0, 8.0$  Hz, 1H), 4.72–4.70 (m, 1H), 4.62–4.60 (m, 1H), 4.51–4.49 (m, 1H), 4.19–4.16 (m, 5H); <sup>13</sup>C NMR (CDCl<sub>3</sub>)  $\delta$  193.55, 153.63, 126.74, 91.29, 78.55, 75.89, 74.47, 71.74, 70.96, 69.70, 67.28, 31.13, 28.47, 22.21, 19.59, 14.04; HRMS (FAB)  $m/z$ : calculated for C<sub>20</sub>H<sub>22</sub>FeO [M]<sup>+</sup>: 334.1020, found 334.1020. Enantiomeric excess was determined by HPLC analysis (Chiralcel OD-H, hexane/2-propanol 90:10, 1.0 mL min<sup>-1</sup>):  $t_R = 6.6$  min (minor), 7.4 min (major).

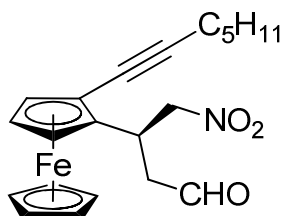

**(*S,R\_p*)-3-(2-Heptyn-1-ylferrocenyl)-4-nitrobutanal (10d).**

<sup>1</sup>H NMR (CDCl<sub>3</sub>)  $\delta$  9.93 (s, 1H), 4.79 (dd,  $J = 12.0, 3.6$  Hz, 1H), 4.60 (dd,  $J = 12.0, 7.4$  Hz, 1H), 4.44–4.41 (m, 1H), 4.17–4.12 (m, 6H), 4.05–3.95 (m, 2H), 3.15 (d,  $J = 6.4$  Hz, 2H), 2.33 (t,  $J = 7.2$

Hz, 2H), 1.64–1.57 (m, 2H), 1.48–1.34 (m, 4H), 0.64 (t,  $J = 7.2$  Hz, 3H);  $^{13}\text{C}$  NMR ( $\text{CDCl}_3$ )  $\delta$  199.55, 90.68, 88.17, 78.70, 76.11, 71.41, 70.48, 67.32, 67.10, 66.14, 45.42, 31.95, 31.16, 28.50, 22.21, 19.55, 14.02; HRMS (FAB)  $m/z$ : calculated for  $\text{C}_{21}\text{H}_{25}\text{FeNO}_3$   $[\text{M}]^+$ : 395.1184, found 395.1187. Enantiomeric excess was determined by HPLC analysis (Chiralcel OJ-H, hexane/2-propanol 70:30,  $1.0\text{ mL min}^{-1}$ ):  $t_{\text{R}} = 18.9$  min (minor), 26.3 min (major).

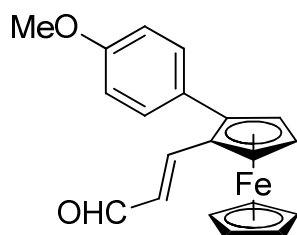

**( $S_p$ )-3-[2-(4-Methoxyphenyl)ferrocenyl]prop-2-enal (1e).**

$^1\text{H}$  NMR ( $\text{CDCl}_3$ )  $\delta$  9.56 (d,  $J = 8.0$  Hz, 1H), 7.67 (d,  $J = 15.6$  Hz, 1H), 7.66–4.0 (m, 2H), 6.96–9.2 (m, 2H), 6.43 (dd,  $J = 15.6, 8.0$  Hz, 1H), 4.76–4.71 (m, 2H), 4.62–4.60 (m, 1H), 4.16–4.13 (m, 5H), 3.86 (s, 3H);  $^{13}\text{C}$  NMR ( $\text{CDCl}_3$ )  $\delta$  193.43, 158.84, 154.24, 130.79, 128.55, 126.66, 113.85, 91.73, 75.86, 73.14, 71.27, 70.55, 66.46, 55.36; HRMS (FAB)  $m/z$ : calculated for  $\text{C}_{20}\text{H}_{18}\text{FeO}_2$   $[\text{M}]^+$ : 346.0656, found 346.0656. Enantiomeric excess was determined by HPLC analysis (Chiralcel OD-H, hexane/2-propanol 90:10,  $1.0\text{ mL min}^{-1}$ ):  $t_{\text{R}} = 15.2$  min (major), 23.6 min (minor).

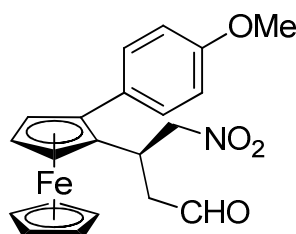

**( $S,R_p$ )-3-[2-(4-Methoxyphenyl)ferrocenyl]-4-nitrobutanal (10e).**

$^1\text{H}$  NMR ( $\text{CDCl}_3$ )  $\delta$  10.01 (s, 1H), 7.48–7.44 (m, 2H), 6.94–6.90 (m, 2H), 4.43–4.41 (m, 1H), 4.27 (brt,  $J = 2.6$  Hz, 1H), 4.22 (dd,  $J = 11.7, 4.2$  Hz, 1H), 4.18–4.12 (m, 6H), 4.05–4.03 (m, 1H), 4.01 (dd,  $J = 11.7, 6.8$  Hz, 1H), 3.85 (s, 3H), 3.23 (dd,  $J = 18.8, 5.6$  Hz, 1H), 3.18 (dd,  $J = 18.8, 8.4$  Hz, 1H);  $^{13}\text{C}$  NMR ( $\text{CDCl}_3$ )  $\delta$  199.66, 158.74, 130.64, 128.65, 113.85, 87.98, 84.89, 78.62, 70.00, 69.35, 67.28, 66.26, 55.30, 45.67, 30.49; HRMS (FAB)  $m/z$ : calculated for  $\text{C}_{21}\text{H}_{21}\text{FeNO}_4$   $[\text{M}]^+$ : 407.0820, found 407.0833. Enantiomeric excess was determined by HPLC analysis (Chiralpak AS-H, hexane/2-propanol 70:30,  $1.0\text{ mL min}^{-1}$ ):  $t_{\text{R}} = 21.7$  min (major), 32.3 min (minor).

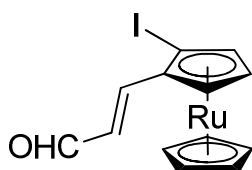

**(*S<sub>p</sub>*)-3-(2-Iodoruthenocenyl)prop-2-enal (1f).**

<sup>1</sup>H NMR (CDCl<sub>3</sub>) δ 9.60 (d, *J* = 8.0 Hz, 1H), 7.41 (d, *J* = 15.6 Hz, 1H), 6.39 (dd, *J* = 15.6, 8.0 Hz, 1H), 5.11–5.09 (m, 1H), 4.99–4.97 (m, 1H), 4.83–4.81 (m, 1H), 4.60–4.56 (m, 5H); <sup>13</sup>C NMR (CDCl<sub>3</sub>) δ 193.41, 152.44, 126.85, 83.80, 80.24, 74.75, 74.00, 68.12, 41.19; HRMS (FAB) *m/z*: calculated for C<sub>13</sub>H<sub>11</sub>IORu [M]<sup>+</sup>: 411.8898, found 411.8900. Enantiomeric excess was determined by HPLC analysis (Chiralcel OD-H, hexane/2-propanol 90:10, 1.0 mL min<sup>-1</sup>): *t<sub>R</sub>* = 9.4 min (minor), 10.6 min (major).

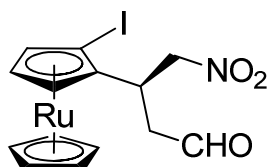

**(*S,R<sub>p</sub>*)-3-(2-Iodoruthenocenyl)-4-nitrobutanal (10f).**

<sup>1</sup>H NMR (CDCl<sub>3</sub>) δ 9.85 (s, 1H), 4.90–4.88 (m, 1H), 4.69 (dd, *J* = 12.2, 4.0 Hz, 1H), 4.61 (dd, *J* = 12.2, 6.8 Hz, 1H), 4.55–4.54 (m, 6H), 4.43–4.41 (m, 1H), 3.74–3.65 (m, 1H), 3.12 (dd, *J* = 18.6, 7.6 Hz, 1H), 2.97 (dd, *J* = 18.6, 5.2 Hz, 1H); <sup>13</sup>C NMR (CDCl<sub>3</sub>) δ 199.14, 92.07, 78.63, 77.78, 73.96, 71.82, 69.39, 46.28, 39.14, 32.72; HRMS (FAB) *m/z*: calculated for C<sub>13</sub>H<sub>11</sub>INO<sub>3</sub>Ru [M]<sup>+</sup>: 472.9062, found 472.9060. Enantiomeric excess was determined by HPLC analysis (Chiralcel OJ-H, hexane/2-propanol 70:30, 1.0 mL min<sup>-1</sup>): *t<sub>R</sub>* = 56.0 min (major), 72.0 min (minor).

**Procedure for the transformation into planar-chiral derivatives.**

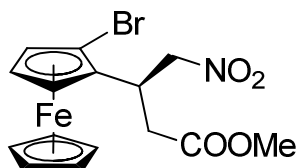

**(*S,R<sub>p</sub>*)-3-(2-Bromoferrocenyl)-4-nitrobutanoic acid methyl ester (11).**

To a solution of compound **10b** (6.3 mg) in *t*-butyl alcohol (1.2 mL) and water (0.3 mL), 16 equiv of 2-methyl-2-butene, 5.0 equiv of sodium dihydrogen phosphate dihydrate, and 3.0 equiv of sodium chlorite were added successively under argon atmosphere. After stirring the mixture for 10 min, brine (5 mL) was added. The resulting mixture was extracted with ethyl acetate. The organic layer was washed with brine and dried over anhydrous magnesium sulfate. After removal of the solvent under reduced pressure, the residue was dissolved in methanol (0.5 mL) and toluene (3.5 mL). To

this solution, 1.2 equiv of trimethylsilyldiazomethane (0.6 M in *n*-hexane) was added. After stirring the mixture for 10 min, the solvent was removed under the reduced pressure. The residue was purified by preparative TLC (hexanes/dichloromethane 4:1) to afford **11** (5.9 mg, 87%). <sup>1</sup>H NMR (CDCl<sub>3</sub>) δ 4.72 (dd, *J* = 12.4, 3.8 Hz, 1H), 4.62 (dd, *J* = 12.4, 6.4 Hz, 1H), 4.53–4.50 (m, 1H), 4.23–4.18 (m, 5H), 4.16–4.13 (m, 1H), 4.03–4.00 (m, 1H), 3.80 (s, 3H), 3.12 (dd, *J* = 16.8, 4.2 Hz, 1H), 3.02 (dd, *J* = 16.8, 9.4 Hz, 1H); <sup>13</sup>C NMR (CDCl<sub>3</sub>) δ 171.89, 85.41, 78.71, 78.05, 71.38, 70.51, 66.48, 65.29, 52.14, 35.60, 33.63; HRMS (FAB) *m/z*: calculated for C<sub>15</sub>H<sub>16</sub>BrFeNO<sub>4</sub> [M]<sup>+</sup>: 408.9612, found 408.9602.

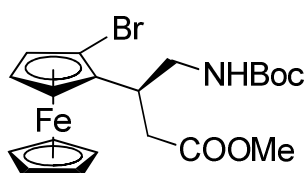

**(*S,R<sub>p</sub>*)-3-(2-Bromoferrocenyl)-4-(*N*-*tert*-butoxycarbonyl)aminobutanoic acid methyl ester (**11**).**

To a solution of **11** (5.0 mg) in THF (50 μL) and acetic acid (50 μL), 15 equiv of Zn powder was added three times with 5 min intervals under argon atmosphere. The resulting mixture was stirred for 1 h at room temperature. This was cooled to 0 °C, and THF (50 μL) and water (100 μL) were added. To this solution, sodium hydrogen carbonate (183 mg) was added in four portions. Then, the mixture was warmed to room temperature and 1.5 equiv of di-*tert*-butyl dicarbonate was added. After stirring the mixture for 1 h, water was added. The mixture was extracted with ethyl acetate, and the organic layer was washed with water two times and dried over anhydrous magnesium sulfate. After removal of the solvent under reduced pressure, the residue was purified by preparative TLC (dichloromethane) to afford **12** (5.2 mg, 89%). <sup>1</sup>H NMR (CDCl<sub>3</sub>) δ 4.50 (brs, 1H), 4.46–4.44 (m, 1H), 4.20–4.15 (m, 5H), 4.11–4.08 (m, 1H), 3.95–3.92 (m, 1H), 3.79 (s, 3H), 3.38–3.26 (m, 2H), 3.23–3.13 (m, 1H), 2.97 (dd, *J* = 15.6, 2.8 Hz, 1H), 2.67 (dd, *J* = 15.6, 9.8 Hz, 1H), 1.39 (s, 9H); <sup>13</sup>C NMR (CDCl<sub>3</sub>) δ 173.06, 155.80, 88.56, 79.15, 79.08, 71.16, 70.02, 66.05, 64.50, 51.96, 44.77, 36.82, 34.71, 28.36; HRMS (FAB) *m/z*: calculated for C<sub>20</sub>H<sub>26</sub>BrFeNO<sub>4</sub> [M]<sup>+</sup>: 479.0395, found 479.0405.

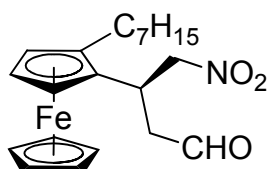

**(*S,R<sub>p</sub>*)-3-(2-Heptylferrocenyl)-4-nitrobutanal (**13**).**

To a solution of **10d** (5.8 mg) in ethyl acetate (0.5 mL), palladium on carbon (10 w%, 2.6 mg) was added. This mixture was stirred under hydrogen atmosphere for 30 min at room temperature. The resulting mixture was purified by preparative TLC (dichloromethane) to afford **13** (5.1 mg, 87%). <sup>1</sup>H



NMR (CDCl<sub>3</sub>)  $\delta$  9.96 (s, 1H), 4.48 (dd,  $J$  = 11.6, 4.0 Hz, 1H), 4.35 (dd,  $J$  = 11.6, 7.4 Hz, 1H), 4.19–4.16 (m, 1H), 4.08–4.02 (m, 6H), 3.91–3.81 (m, 2H), 3.32 (dd,  $J$  = 19.0, 4.8 Hz, 1H), 3.25 (dd,  $J$  = 19.0, 8.4 Hz, 1H), 2.45–2.35 (m, 1H), 2.33–2.24 (m, 1H), 1.62–1.50 (m, 2H), 1.43–1.28 (m, 8H), 0.91 (t,  $J$  = 6.2 Hz, 3H); <sup>13</sup>C NMR (CDCl<sub>3</sub>)  $\delta$  199.67, 87.75, 85.55, 79.38, 69.24, 68.30, 66.38, 65.65, 46.48, 31.84, 30.64, 30.45, 29.99, 29.22, 27.62, 22.65, 14.13; HRMS (FAB)  $m/z$ : calculated for C<sub>21</sub>H<sub>21</sub>FeNO<sub>3</sub> [M]<sup>+</sup>: 399.1497, found 399.1496.

### Preparation of substrates 1a-f.

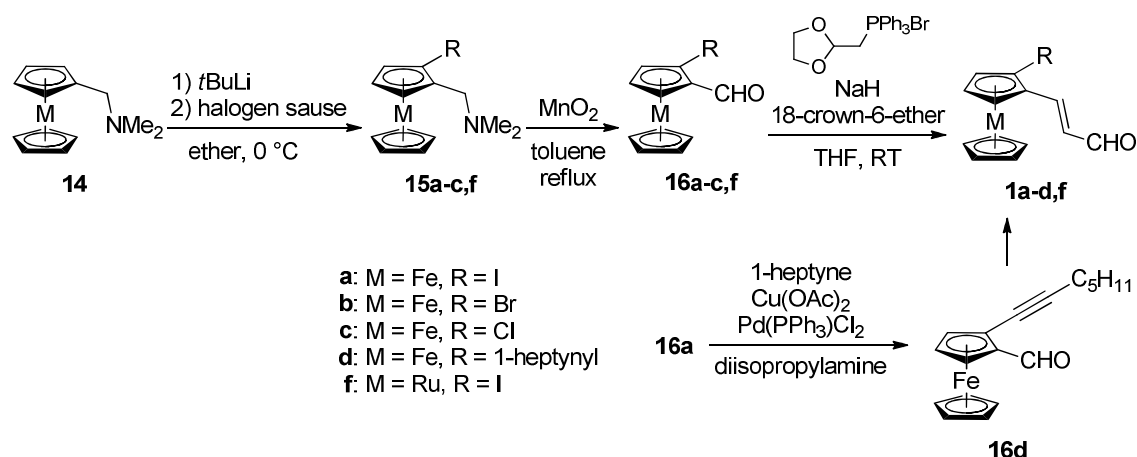

### Typical procedure for the conversion of 14 to 15.<sup>2</sup>

To a solution of dimethylaminomethylferrocene (**14**, 1.2 mL) in diethyl ether (10 mL), 0.85 equiv of *t*-butyllithium (1.64 M in *n*-pentane) was added dropwise at 0 °C under argon atmosphere. After stirring the solution for 10 min, 1.05 equiv of 1,2-diiodoethane was added. This solution was stirred for 10 min, warmed to room temperature, and stirred for 30 min. Then, water (10 mL) was added, and the resulting mixture was extracted with diethyl ether. The organic layer was washed with water and dried over anhydrous magnesium sulfate. After removal of the solvent under reduced pressure, the residue was purified by silica-gel column chromatography (hexanes/ethyl acetate/triethylamine 50:46:4) to afford 1-(dimethylaminomethyl)-2-iodoferrocene (**15a**, 1.3 g, 59% yield).

For the synthesis of 1-bromo-2-dimethylaminomethylferrocene (**15b**), 1.5 equiv of *t*-butyllithium and 2.0 equiv of 1,1,2,2-tetrabromoethane instead of 1,2-diiodoethane were used. For the synthesis of 1-chloro-2-dimethylaminomethyl ferrocene (**15c**), 2.0 equiv of *t*-butyllithium and 1.5 equiv of hexachloroethane instead of 1,2-diiodoethane were used.

The spectroscopic data for **15a**<sup>3</sup> and **15b**<sup>4</sup> were reported.

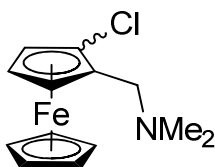

**1-Chloro-2-dimethylaminomethylferrocene (15c).**

$^1\text{H}$  NMR ( $\text{CDCl}_3$ )  $\delta$  4.42–4.39 (m, 1H), 4.21–4.10 (m, 6H), 4.06–4.03 (m, 1H), 3.53 (d,  $J = 13.0$  Hz, 1H), 3.69 (d,  $J = 13.0$  Hz, 1H), 2.22 (s, 6H);  $^{13}\text{C}$  NMR ( $\text{CDCl}_3$ )  $\delta$  93.67, 80.80, 70.73, 67.86, 64.96, 56.12, 44.85; HRMS (FAB)  $m/z$ : calculated for  $\text{C}_{13}\text{H}_{16}\text{ClFeN}$   $[\text{M} + \text{H}]^+$ : 278.0394, found 278.0412.

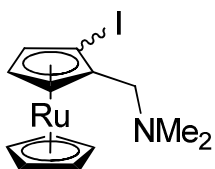

**1-Dimethylaminomethyl-2-iodoruthenocene (15f).**

$^1\text{H}$  NMR ( $\text{CDCl}_3$ )  $\delta$  4.85–4.82 (m, 1H), 4.65–4.62 (m, 1H), 4.56–4.50 (m, 6H), 3.24 (d,  $J = 13.2$  Hz, 1H), 3.19 (d,  $J = 13.2$  Hz, 1H), 2.28 (s, 6H);  $^{13}\text{C}$  NMR ( $\text{CDCl}_3$ )  $\delta$  89.17, 77.62, 73.43, 71.66, 71.58, 58.58, 45.15, 41.50; HRMS (FAB)  $m/z$ : calculated for  $\text{C}_{13}\text{H}_{16}\text{INRu}$   $[\text{M}]^+$ : 414.9371, found 414.9377.

**Typical procedure for the conversion of 15 to 16.<sup>5</sup>**

To a solution of 1-dimethylaminomethyl-2-iodoferrocene (**15a**, 0.59 g) in toluene (15 mL), manganese dioxide (3.2 g) was added. The resulting mixture was refluxed for 90 min under argon atmosphere. After cooling to room temperature, the solid was filtered off, and washed with chloroform. After removal of the solvent under reduced pressure, the residue was purified by silica-gel column chromatography (hexanes/ethyl acetate 4:1) to afford 1-formyl-2-iodoferrocene (**16a**, 0.26 g, 48%).

The spectroscopic data for **16a** and **16b** were reported.<sup>6</sup>

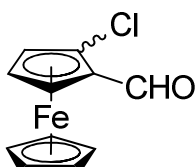

**1-Chloro-2-formylferrocene (16c).**

$^1\text{H}$  NMR ( $\text{CDCl}_3$ )  $\delta$  10.22 (s, 1H), 4.82–4.78 (m, 2H), 4.56–4.51 (m, 1H), 4.39–4.30 (m, 5H);  $^{13}\text{C}$  NMR ( $\text{CDCl}_3$ )  $\delta$  192.24, 95.08, 74.73, 72.72, 71.93, 69.81, 65.97; HRMS (FAB)  $m/z$ : calculated for

C<sub>11</sub>H<sub>9</sub>ClFeO [M]<sup>+</sup>: 247.9691, found 247.9679.

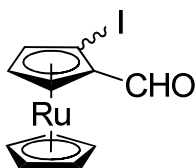

**1-Formyl-2-iodoruthenocene (16f).**

<sup>1</sup>H NMR (CDCl<sub>3</sub>) δ 9.84 (s, 1H), 5.15–5.11 (m, 2H), 4.90–4.88 (m, 1H), 4.68–4.66 (m, 5H); <sup>13</sup>C NMR (CDCl<sub>3</sub>) δ 191.30, 82.54, 81.42, 75.16, 74.71, 69.75, 65.97; HRMS (FAB) *m/z*: calculated for C<sub>11</sub>H<sub>9</sub>IORu [M]<sup>+</sup>: 385.8742, found 385.8743.

1-Formyl-2-heptyn-1-ylferrocene (**16d**) was synthesized from 1-formyl-2-iodoferrocene (**16a**) by a known procedure.<sup>7</sup>

**Typical procedure for the conversion of 16 to 1.**<sup>8</sup>

To a solution of 1-formyl-2-iodoferrocene (**16a**, 110 mg) in THF (7 mL), 2.0 equiv of (1,3-dioxolan-2-yl)methyltriphenylphosphonium bromide, 4.2 equiv of sodium hydride (dispersion in paraffin liquid, 60%), and 18-crown-6-ether (1.2 mg) were added. The resulting mixture was stirred overnight at room temperature under argon atmosphere. After adding water (10 mL) slowly, the mixture was extracted with diethyl ether. The organic layer was washed with brine and dried over anhydrous magnesium sulfate. After removal of the solvent under reduced pressure, the residue was dissolved in THF (5 mL). An aqueous solution of HCl (1 N, 1 mL) was added to the solution, and this mixture was stirred for 10 min at room temperature. After adding a saturated aqueous solution of sodium hydrogen carbonate, the mixture was extracted with chloroform two times. The combined organic layer was dried over anhydrous magnesium sulfate. After removal of the solvent under reduced pressure, the residue was purified by silica-gel column chromatography (dichloromethane) followed by preparative TLC (hexanes/ethyl acetate 4:1) to afford 3-(2-iodoferrocenyl)prop-2-enal (**1a**, 62.9 mg, 58%).

**Preparation of 1e.**<sup>9</sup>

To a solution of **1a** (8.5 mg) in THF (0.75 mL) and water (0.25 mL), 20 mol% of palladium(II) acetate, 1.3 equiv of *p*-methoxyphenylbenzeneboronic acid, and 2.5 equiv of barium(II) hydroxide were added. The resulting mixture was refluxed for 3 h under argon atmosphere. After cooling to room temperature, the mixture was extracted with diethyl ether. The organic layer was washed with water and dried over anhydrous magnesium sulfate. After removal of the solvent under reduced pressure, the residue was purified by preparative TLC (hexanes/ethyl acetate 4:1) to afford **1e** (5.5

mg, 72%).

#### Determination of the absolute configurations of the obtained compounds.

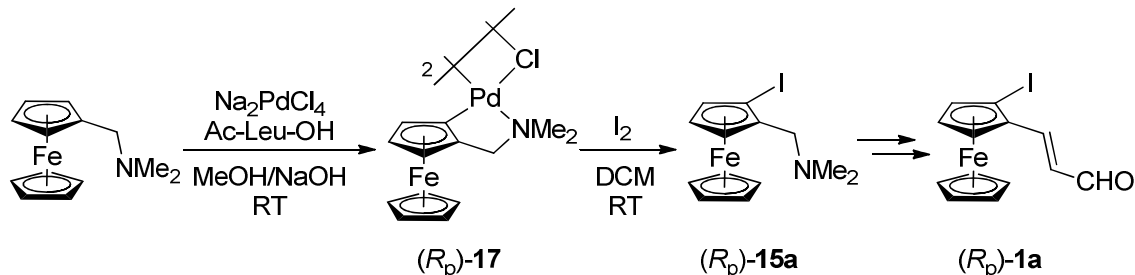

(R<sub>p</sub>)-Bis(μ-chloro)bis(2-dimethylaminomethylferrocenyl)-N-dipalladium (**17**) was synthesized by a known procedure.<sup>10</sup> To a solution of (R<sub>p</sub>)-**17** (48.6 mg) in dichloromethane (5 mL) 16 equiv of iodine was added. After stirring the mixture for 3 h at room temperature, the solid was filtered off. The solution was washed with aqueous sodium thiosulfate, and the organic layer was dried over anhydrous magnesium sulfate. The solvent was removed under reduced pressure and the residue was purified by preparative TLC (hexanes/ethyl acetate/triethylamine 76:20:4) to afford (R<sub>p</sub>)-1-dimethylaminomethyl-2-iodoferrocene (**15a**, 19.8 mg, 43%).<sup>11</sup> By the method described above, (R<sub>p</sub>)-**1a** was synthesized from (R<sub>p</sub>)-**15a** as noted above (78% ee). By comparing the retention time on the HPLC analysis, the absolute configuration of the major enantiomer obtained by the peptide-catalyzed hydrogenation was determined as S<sub>p</sub> for **1a**. Based on the mechanistic similarity for the peptide-catalyzed reaction with other substrates, the major configurations of all compounds were assigned as the same ones.

In the peptide-catalyzed kinetic resolution by the addition of nitromethane, the absolute configuration of the major enantiomer for the recovered starting material **1a** was determined as S<sub>p</sub> by comparing with the above-mentioned sample. Accordingly, the major configuration of the planar-ferrocenyl part of product **10a** was assigned as R<sub>p</sub>. The relative configurations of the major diastereomer for **10a** were determined by an X-ray crystallographic analysis of the corresponding carboxylic form of racemic **10a**. Thus, the absolute configurations of the major product obtained by the peptide catalyst was assigned as S,R<sub>p</sub>.

To a solution of racemic compound **10a** (3.2 mg) in *t*-butyl alcohol (800 μL) and water (200 μL), 10 equiv of 2-methyl-2-butene, 5.0 equiv of sodium dihydrogen phosphate dihydrate, and 3.0 equiv of sodium chlorite were added successively. After stirring the mixture at 0 °C for 30 min, brine (5 mL) was added. The resulting mixture was extracted with chloroform. The organic layer was washed with brine and dried over anhydrous magnesium sulfate. After removal of the solvent under reduced pressure, the residue was purified by preparative TLC (hexanes/ethyl acetate/acetic acid 76:20:4) to afford 3-(2-iodoferrocenyl)-4-nitrobutanoic acid (2.2 mg, 66%). <sup>1</sup>H NMR (CDCl<sub>3</sub>) δ 4.72 (dd, *J* =

12.4, 3.6 Hz, 1H), 4.60 (dd,  $J = 19.0, 6.4$  Hz, 1H), 4.54–4.52 (m, 1H), 4.26 (brt,  $J = 2.4$  Hz, 1H), 4.20–4.17 (m, 5H), 4.09–4.08 (m, 1H), 3.74–3.67 (m, 1H), 3.23 (dd,  $J = 17.4, 4.0$  Hz, 1H), 3.15 (dd,  $J = 17.4, 9.0$  Hz, 1H). A crystal suitable for an X-ray diffraction analysis was obtained by recrystallization from chloroform. The X-Ray diffraction analysis was performed on a Rigaku Mercury–CCD diffractometer equipped with a graphite monochromatized Mo K $\alpha$  source ( $\lambda = 0.71075$  Å). Data were processed using the CrystalClear program package<sup>12</sup> and corrected for absorption. Structure solution and refinements were performed by using the CrystalStructure program package.<sup>13</sup> The positions of non-hydrogen atoms were determined by direct methods (SIR2008<sup>14</sup>) and refined with anisotropic thermal parameters by full-matrix least-squares techniques (SHELXL97<sup>15</sup>). All hydrogen atoms were found in Fourier maps and refined isotropically. Crystallographic data in CIF format is deposited at the Cambridge Crystallographic Data Centre (CCDC 996655).

|                                        |                       |
|----------------------------------------|-----------------------|
| formula                                | C14 H14 Fe I N O4     |
| fw                                     | 443.02                |
| T (K)                                  | 113                   |
| cryst syst                             | Triclinic             |
| space group                            | P -1                  |
| a, (Å)                                 | 6.997(3)              |
| b, (Å)                                 | 7.231(3)              |
| c, (Å)                                 | 15.311(6)             |
| $\alpha$ , (°)                         | 93.523(5)             |
| $\beta$ , (°)                          | 97.073(4)             |
| $\gamma$ , (°)                         | 101.321(6)            |
| Volume, (Å <sup>3</sup> )              | 750.9(5)              |
| D <sub>x</sub> , (g/cm <sup>-3</sup> ) | 1.959                 |
| Z                                      | 2                     |
| $\mu$ , (mm <sup>-1</sup> )            | 3.073                 |
| F(000)                                 | 432.0                 |
| crystal size (mm <sup>3</sup> )        | 0.400 x 0.350 x 0.030 |
| Transmission factor                    | 0.690–0.912           |
| Number of unique reflections           | 3556                  |
| $R_{\text{int}}$                       | 0.0264                |
| Number of variables                    | 246                   |
| 2 $\theta$                             | 6° < 2 $\theta$ < 55° |

|                                                    |                |
|----------------------------------------------------|----------------|
| GOF on $F^2$                                       | 0.967          |
| $R_1$ [ $I > 2\sigma(I)$ ], $wR_2$ [all data]      | 0.0214, 0.0484 |
| Residual electron density ( $e \text{ \AA}^{-3}$ ) | 0.740 (-0.570) |

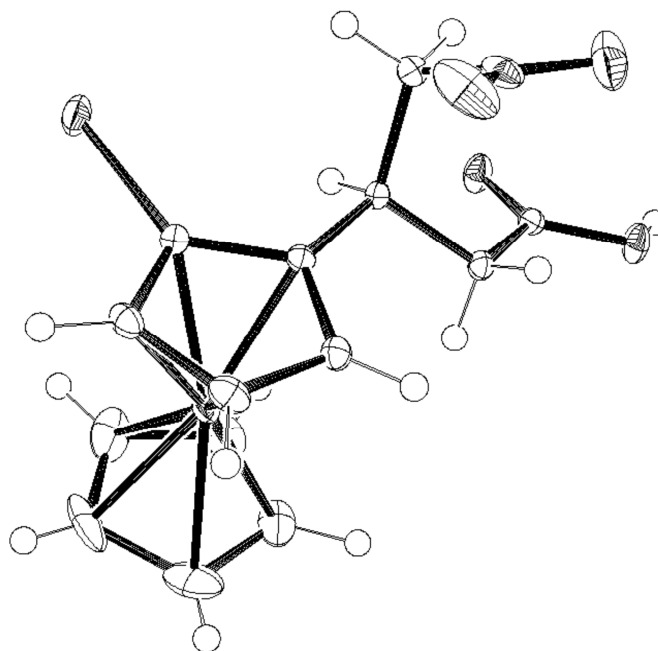

(50% thermal ellipsoids, hydrogen atoms are omitted for clarity)

#### References.

- 1 K. Akagawa, R. Suzuki and K. Kudo, *Adv. Synth. Catal.* 2012, **354**, 1280.
- 2 B. Yucel, B. Sanli, H. Soylemez and H. Akbulut, *J. Organomet. Chem.* 2012, **704**, 49.
- 3 H. Plenio, J. Hermann and J. Leukel, *Eur. J. Inorg. Chem.* 1998, 2063.
- 4 I. R. Butler, B. Woldt, M.-Z. Oh and D. J. Williams, *Inorg. Chem. Commun.* 2006, **9**, 1255.
- 5 S. Malfait, L. Péliniski, L. Maciejewski and J. Brocard, *Synlett* 1997, 830.
- 6 M. Wihalm, U. Nettekoven and K. Mereiter, *Tetrahedron: Asymmetry* 1999, **10**, 4369.
- 7 N. K.-Busies, J. M. Neudörfl, P. Wefelmeier, A. Prokop, H. Kühn and H.-G. Schmalz, *Eur. J. Org. Chem.* 2011, 4634.
- 8 D. Plazuk, I. Janowska, A. Klys, A. Hameed and J. Zakrzewski, *Synth. Commun.* 2003, **33**, 381.
- 9 V. Mamane and O. Riant, *Tetrahedron* 2001, **57**, 2555.
- 10 (a) V. I. Sokolov, L. L. Troitskaya and O. A. Reutov, *J. Organomet. Chem.* 1979, **182**, 537; (b) M. E. Günay and C. J. Richards, *Organometallics*, 2009, **28**, 5833.
- 11 L. L. Troitskaya, V. I. Sokolov, L. M. Epstein and Y. S. Shubina, *Organometallics* 1994, **13**,

200.

- 12 CrystalClear 1.3.6, Rigaku Corporation, 1999.
- 13 *CrystalStructure 4.0*: Rigaku Corporation, Tokyo 196-8666, Japan, 2000–2010.
- 14 SIR2008: M. C. Burla, R. Caliandro, M. Camalli, B. Carrozzini, G. L. Casciarano, L. De Caro, C. Giacovazzo, G. Polidori, D. Siliqi and R. Spagna, 2007.
- 15 SHELX97: G. M. Sheldrick, *Acta Crystallogr.* 2008, **A64**, 112.

$^1\text{H}$  and  $^{13}\text{C}$  NMR spectra.

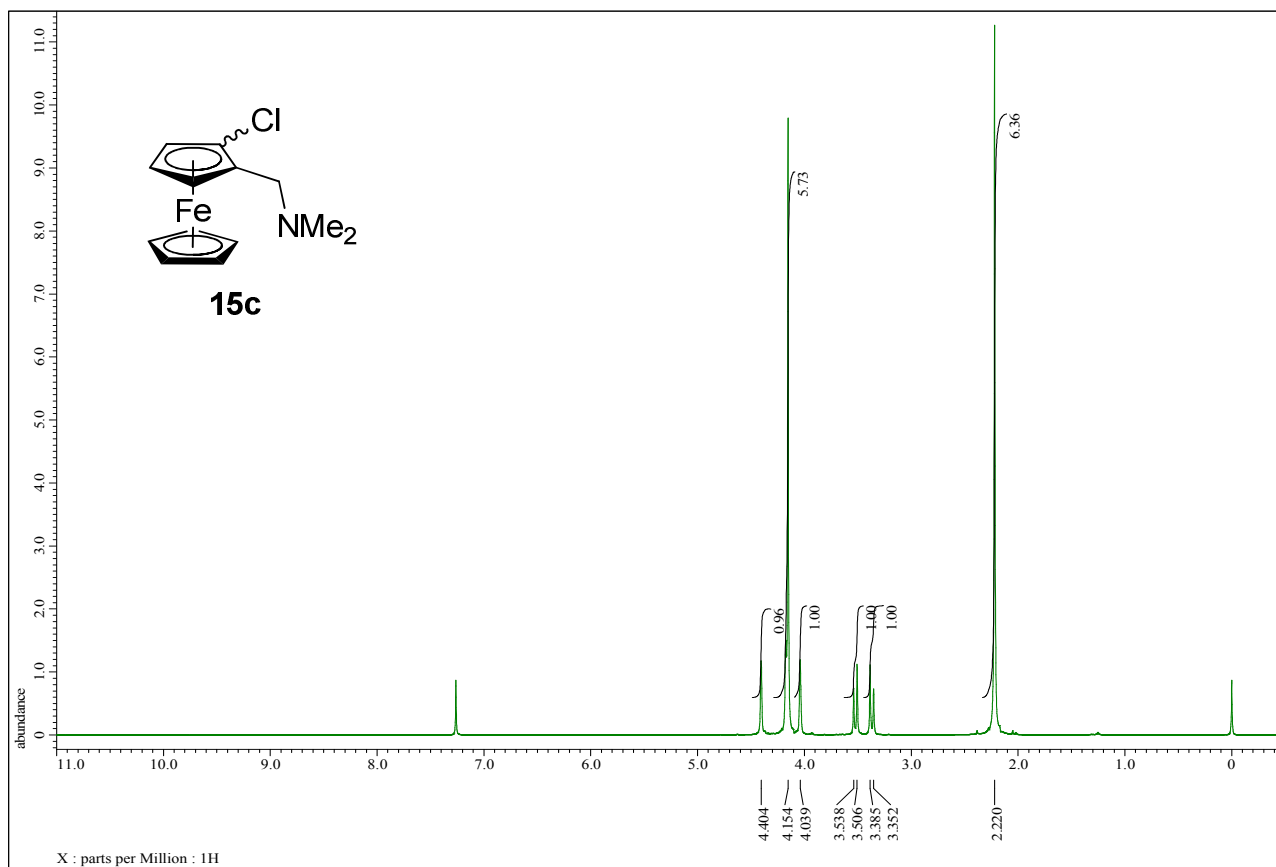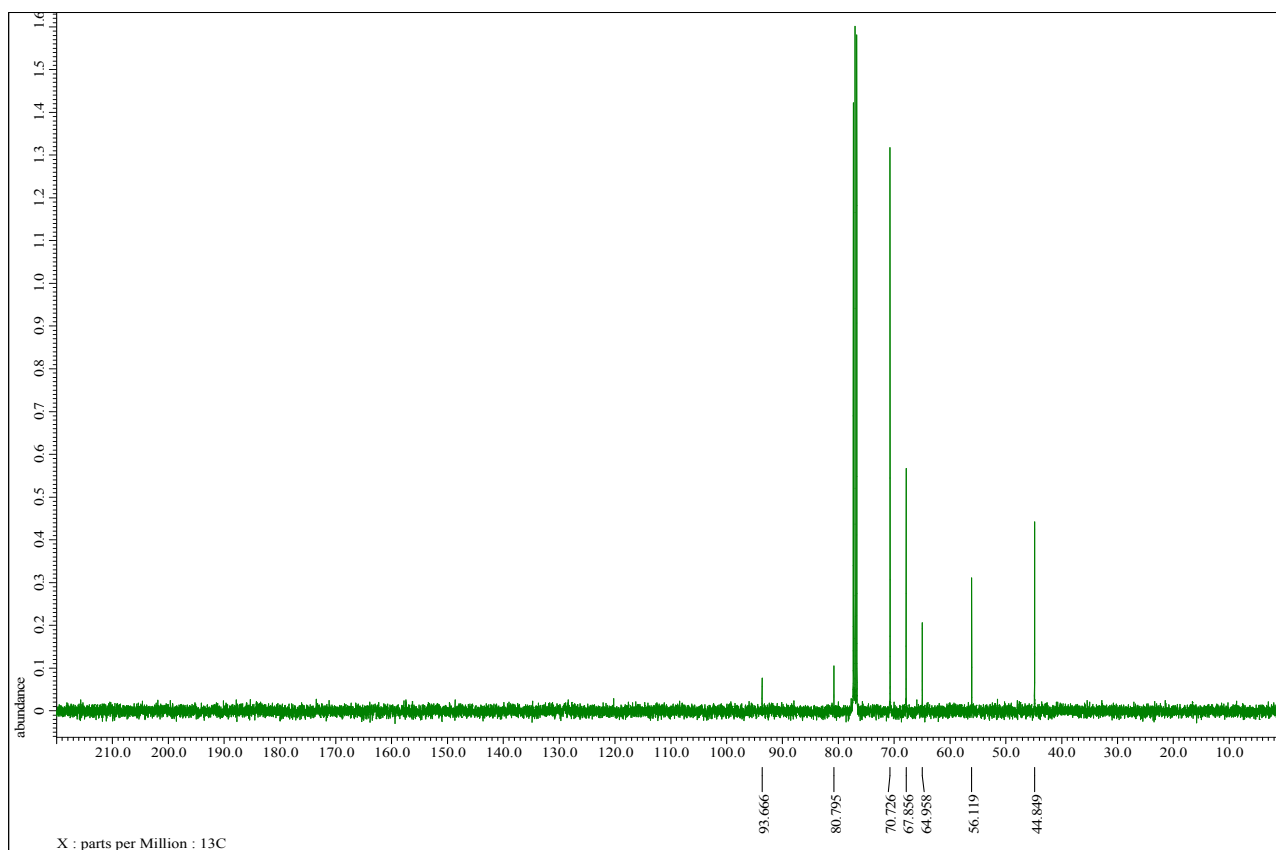



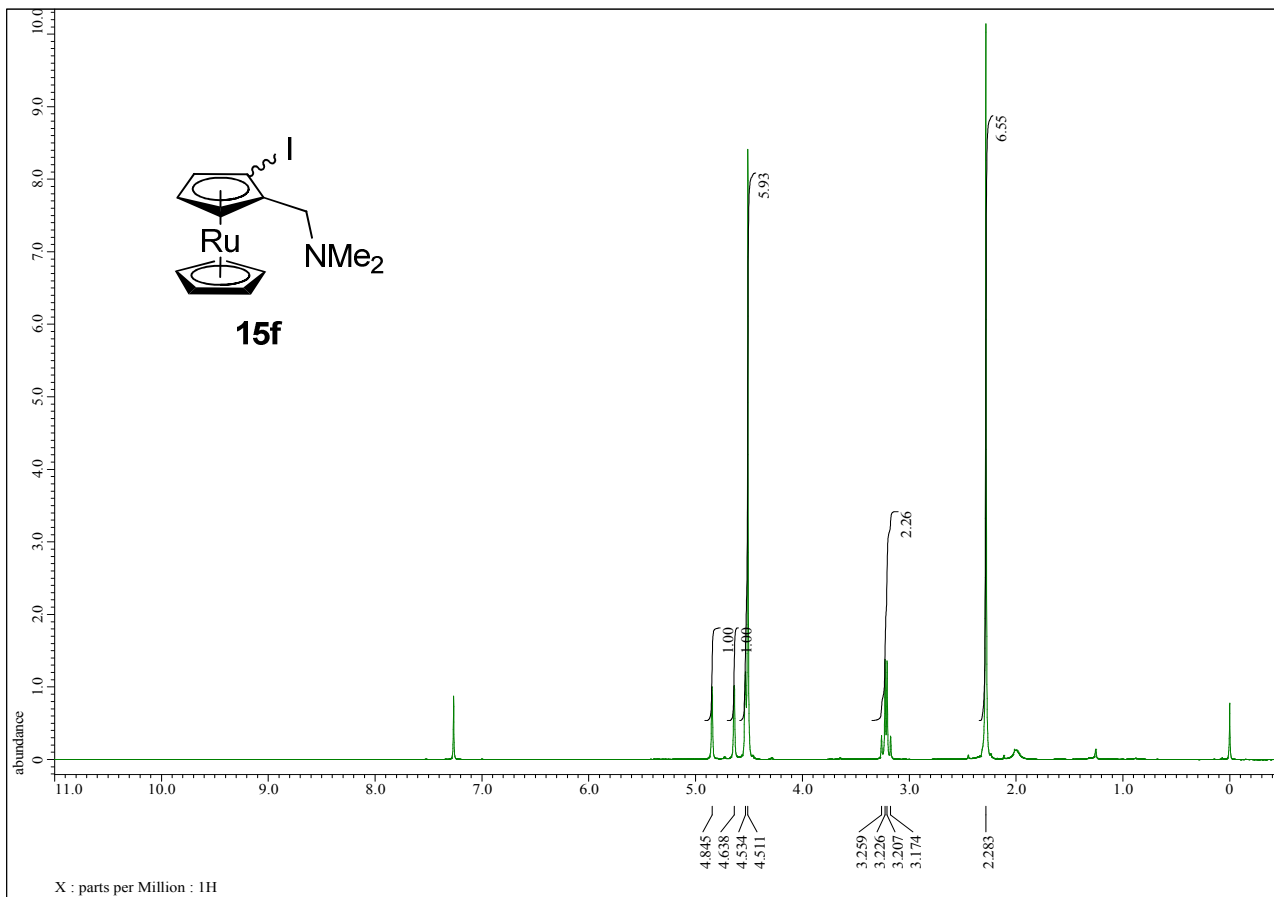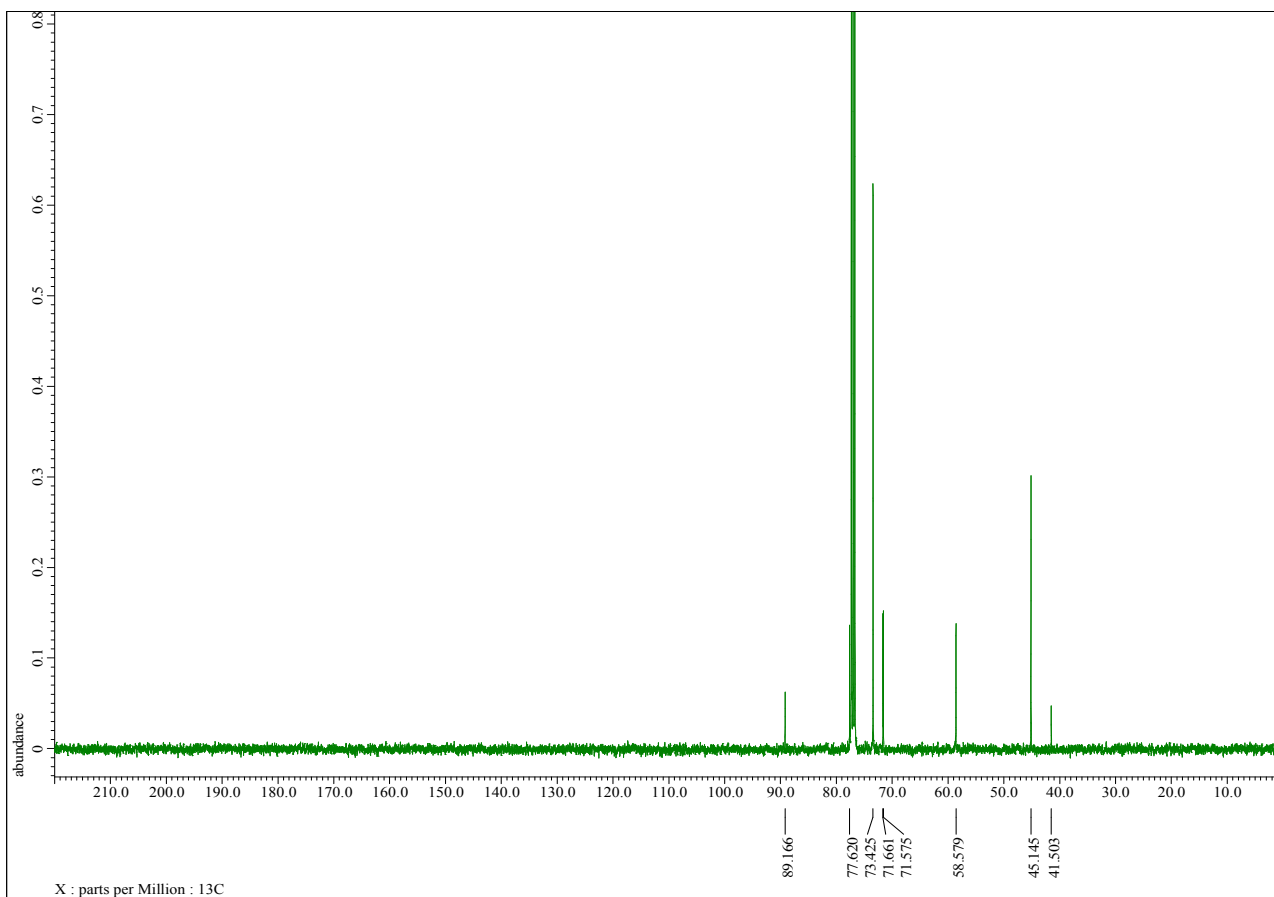

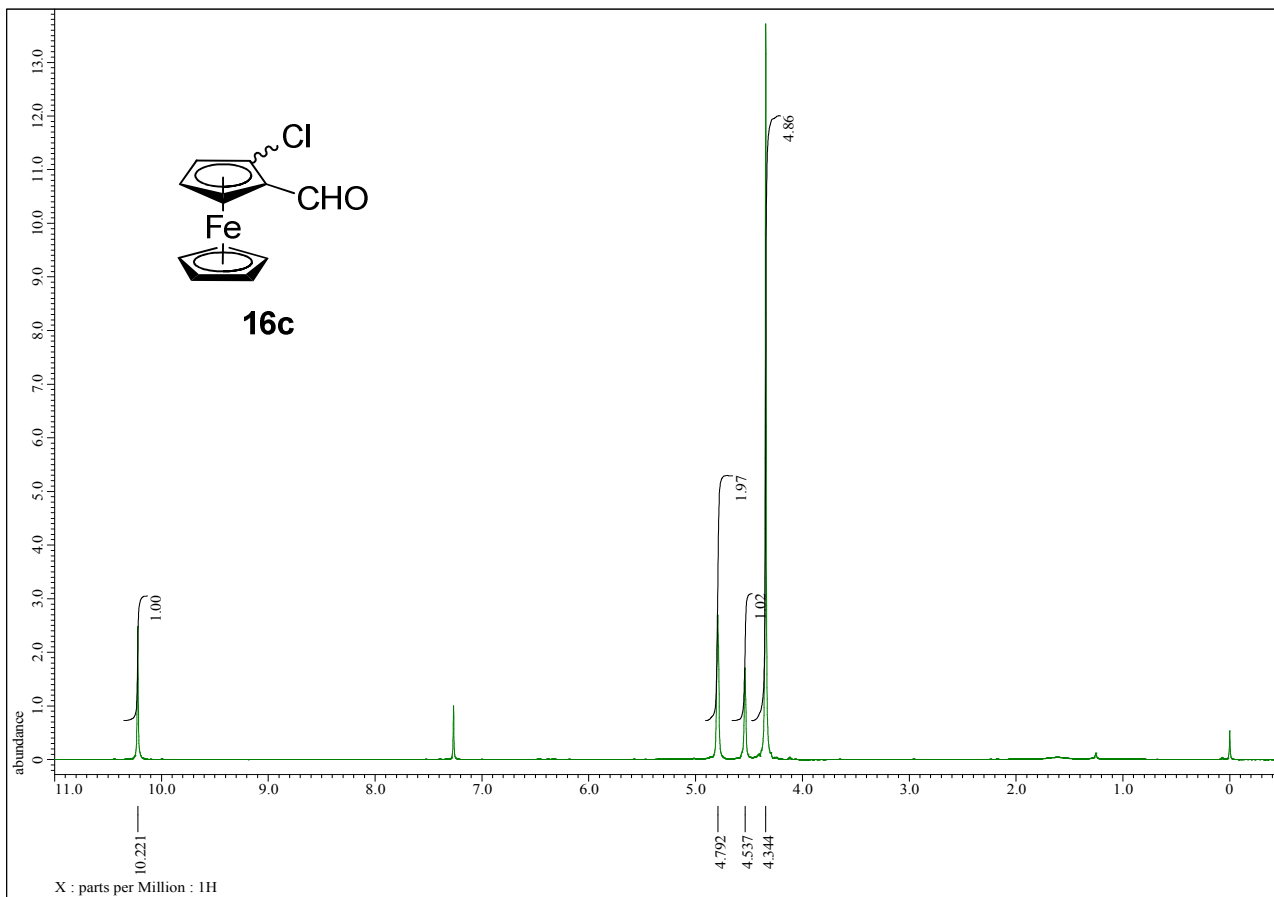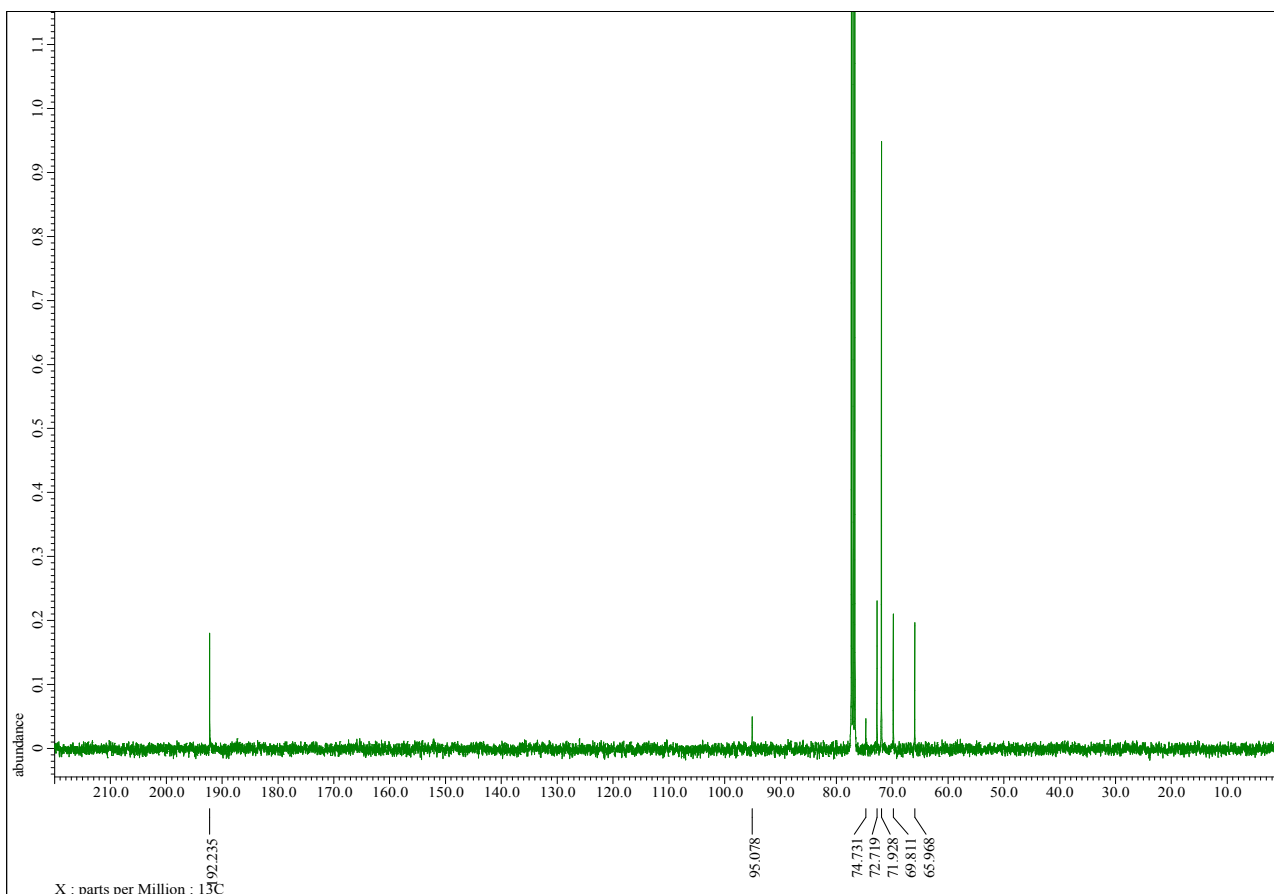

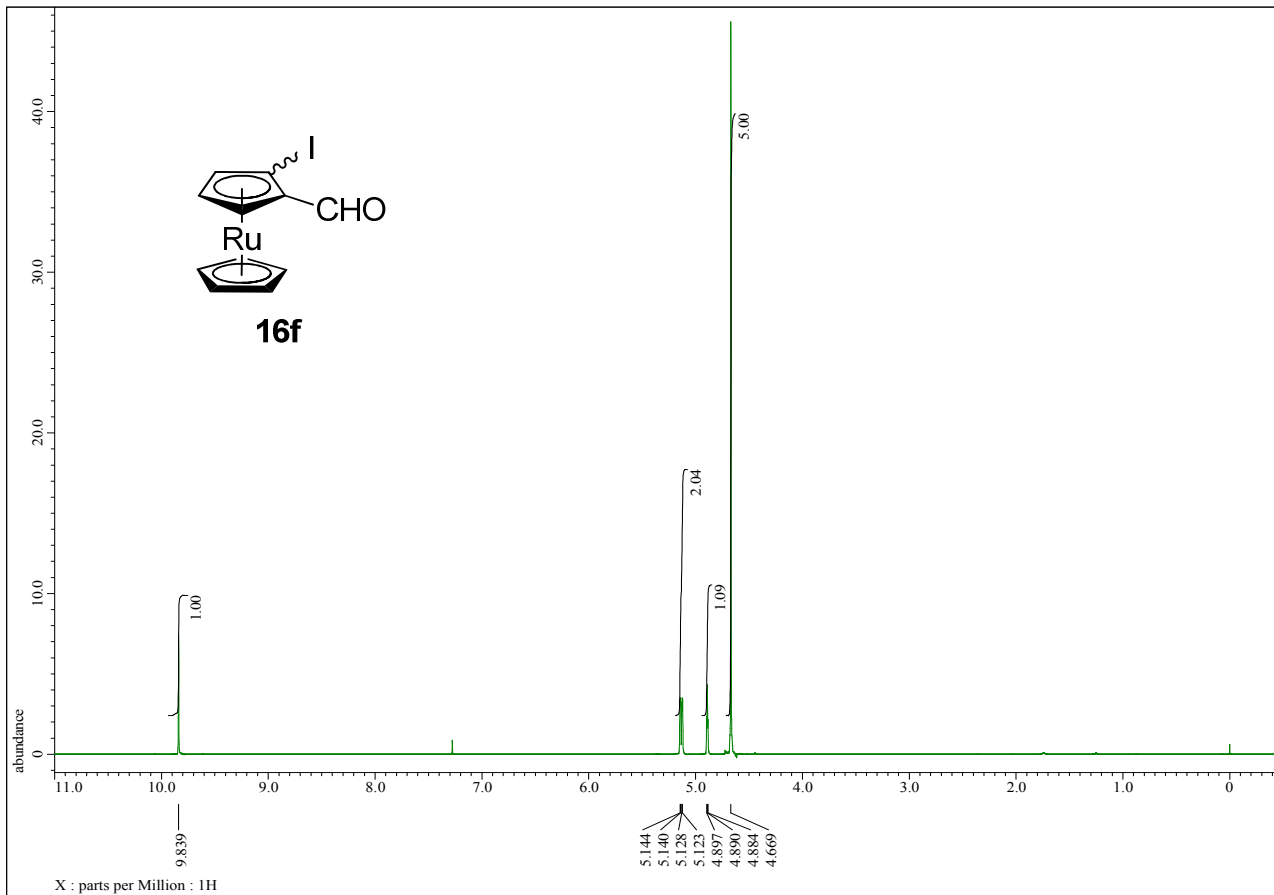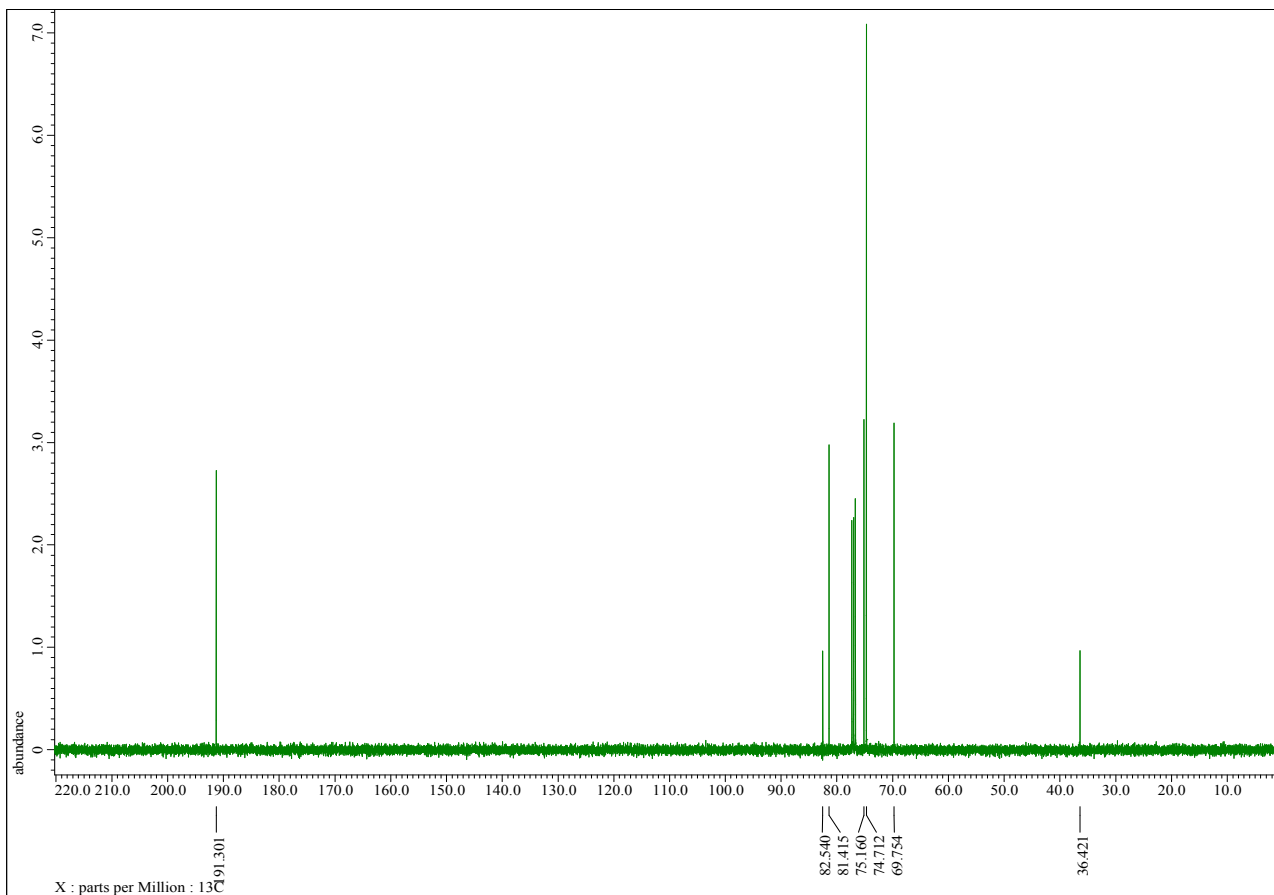

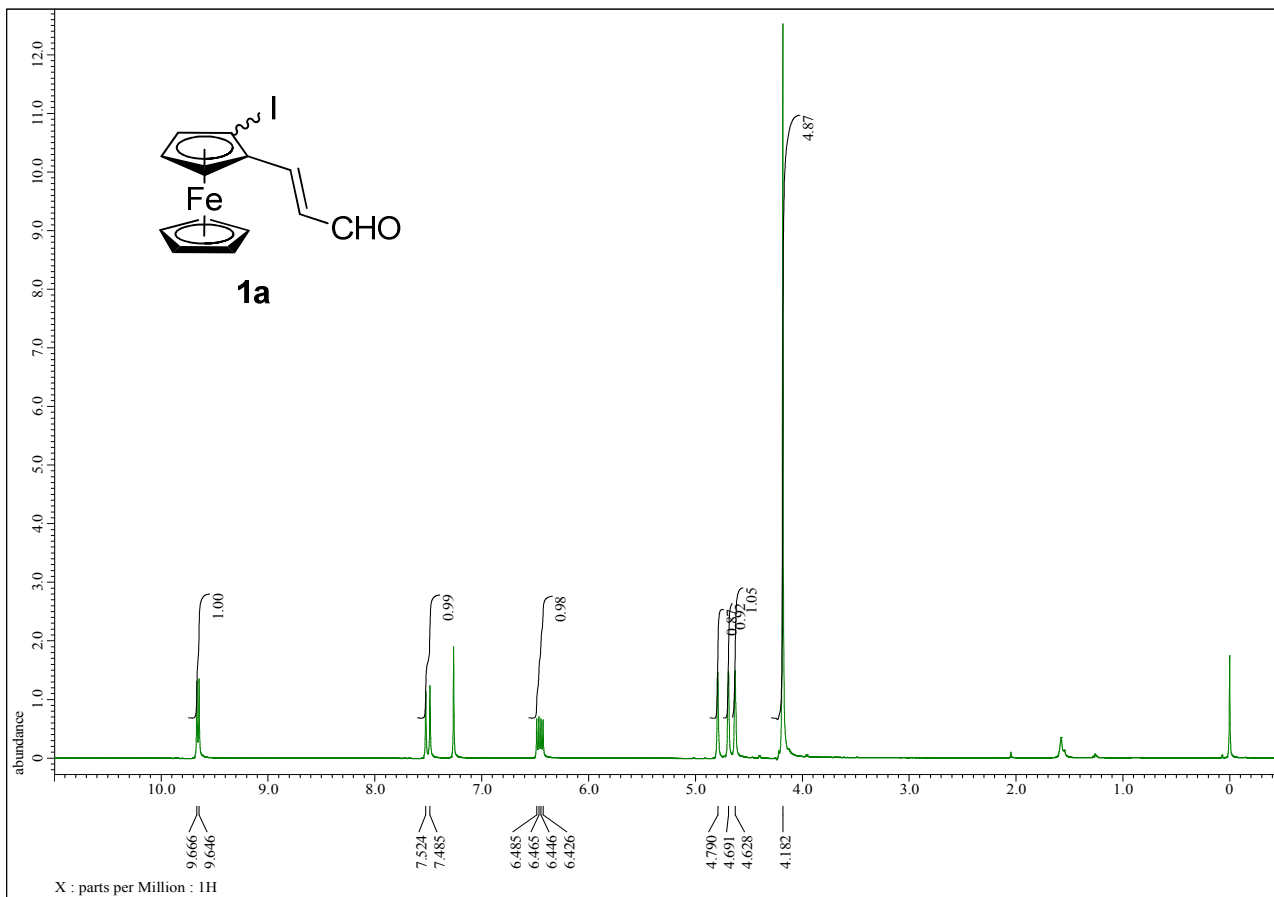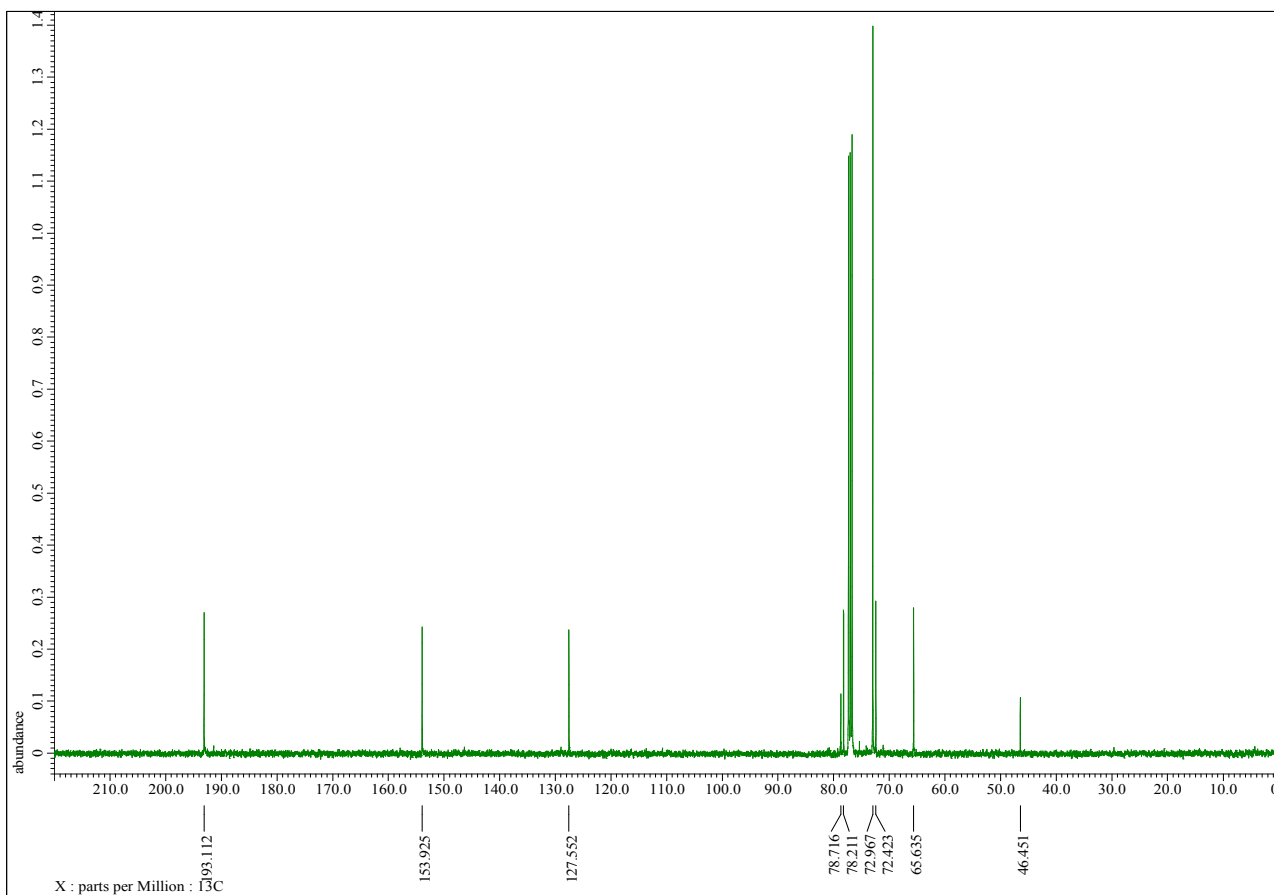

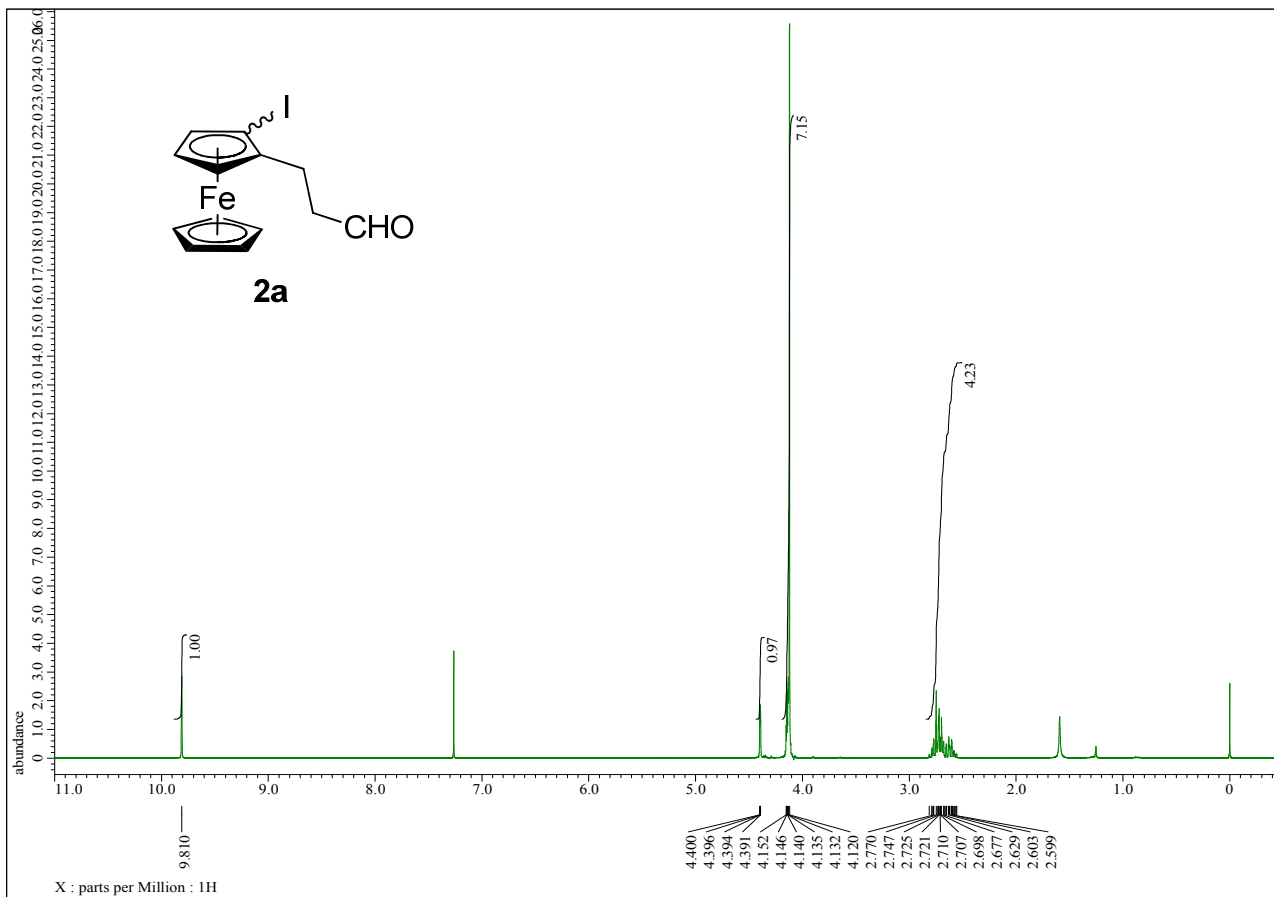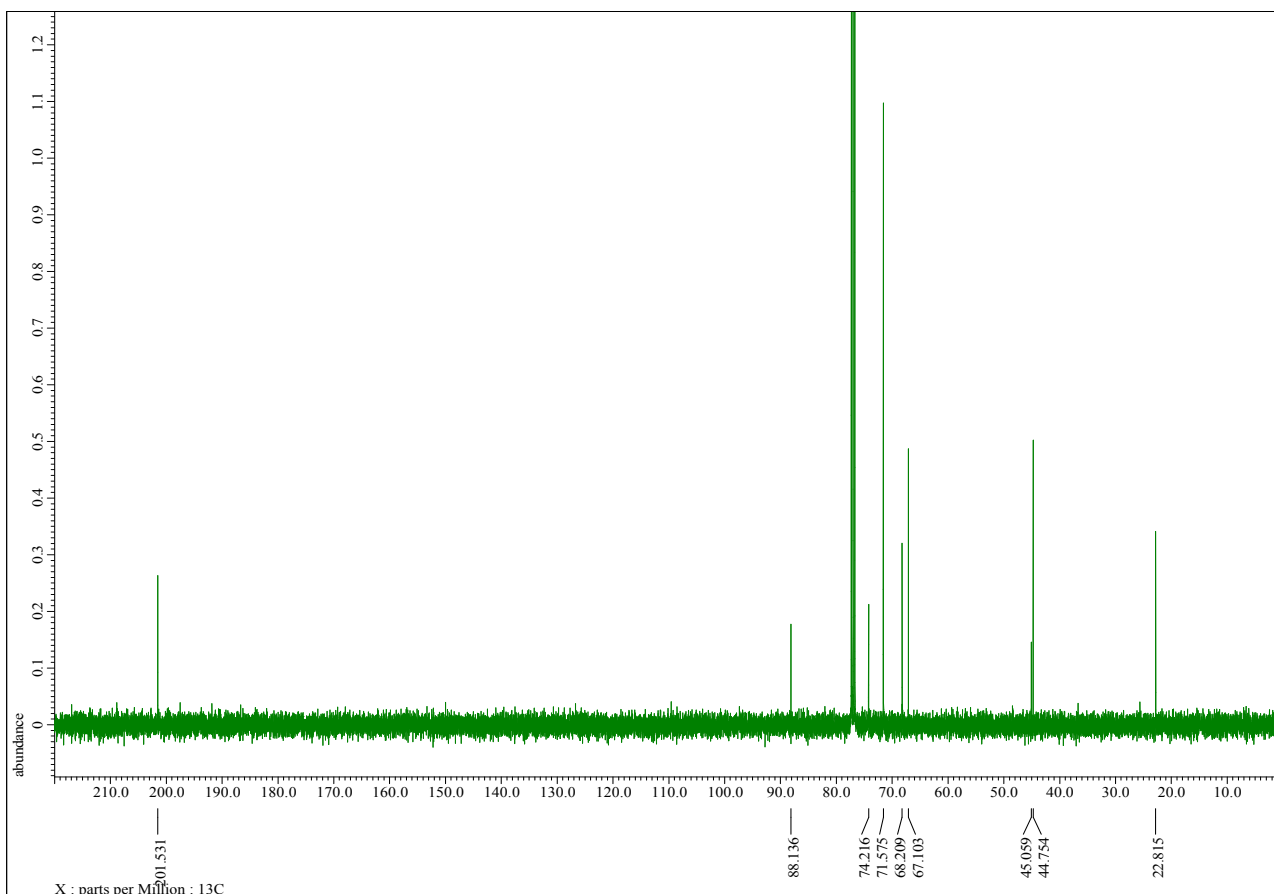

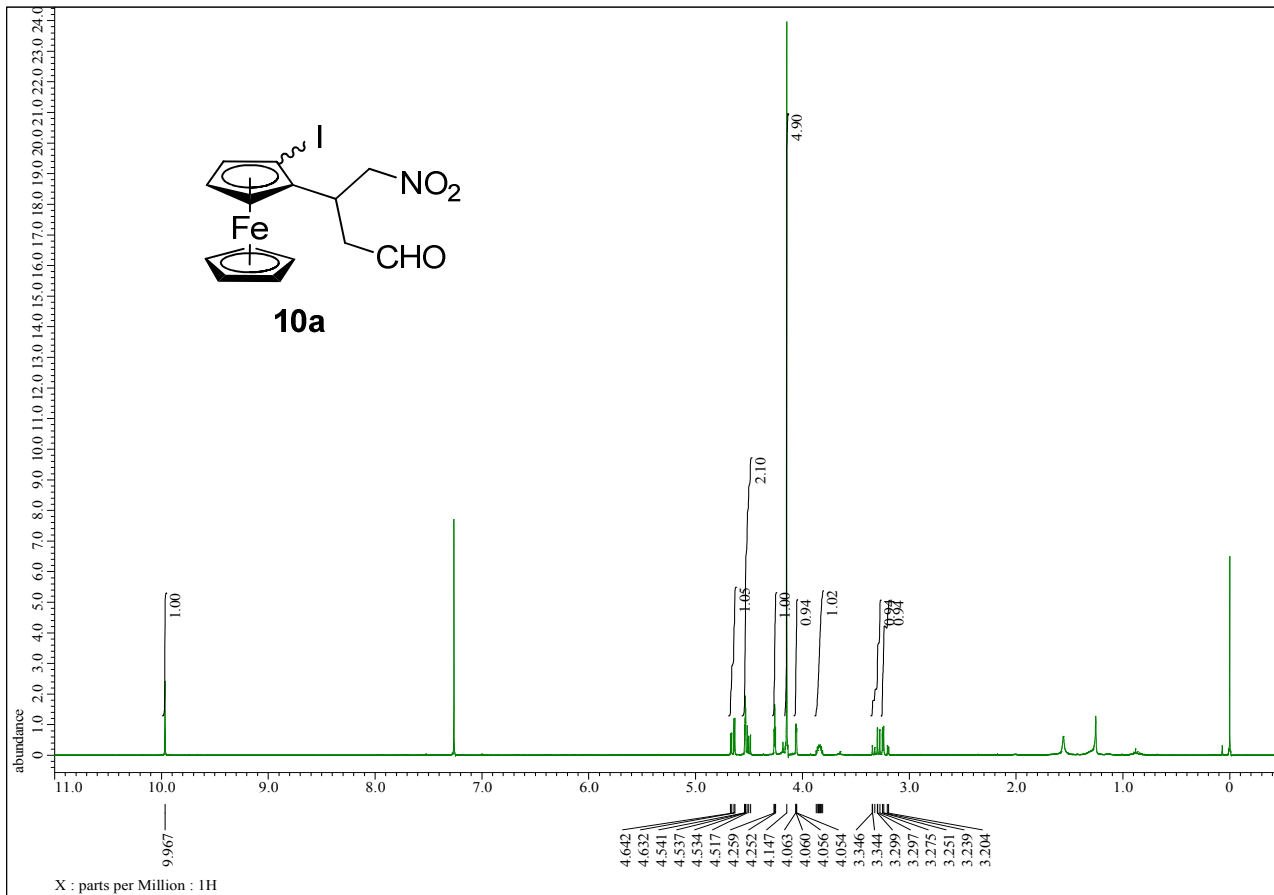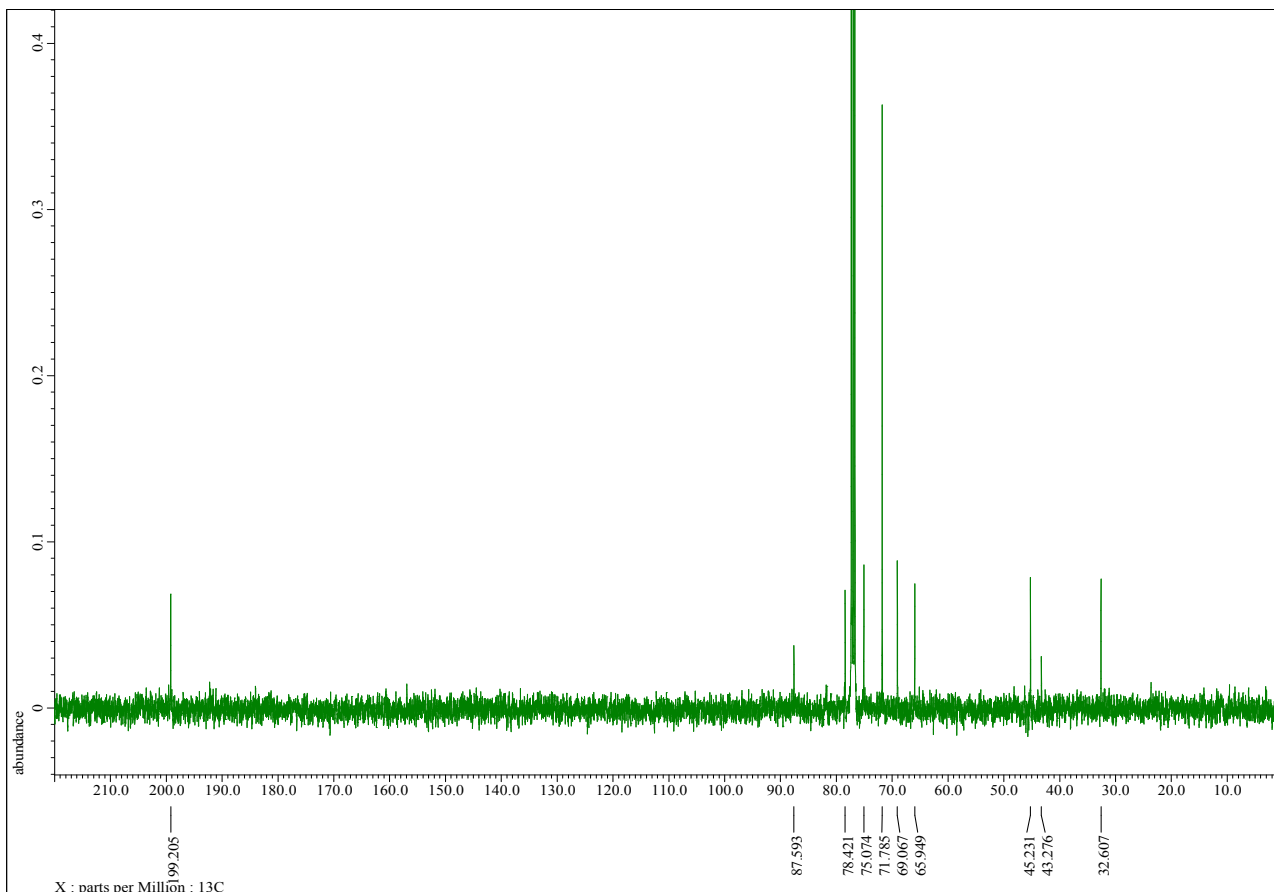

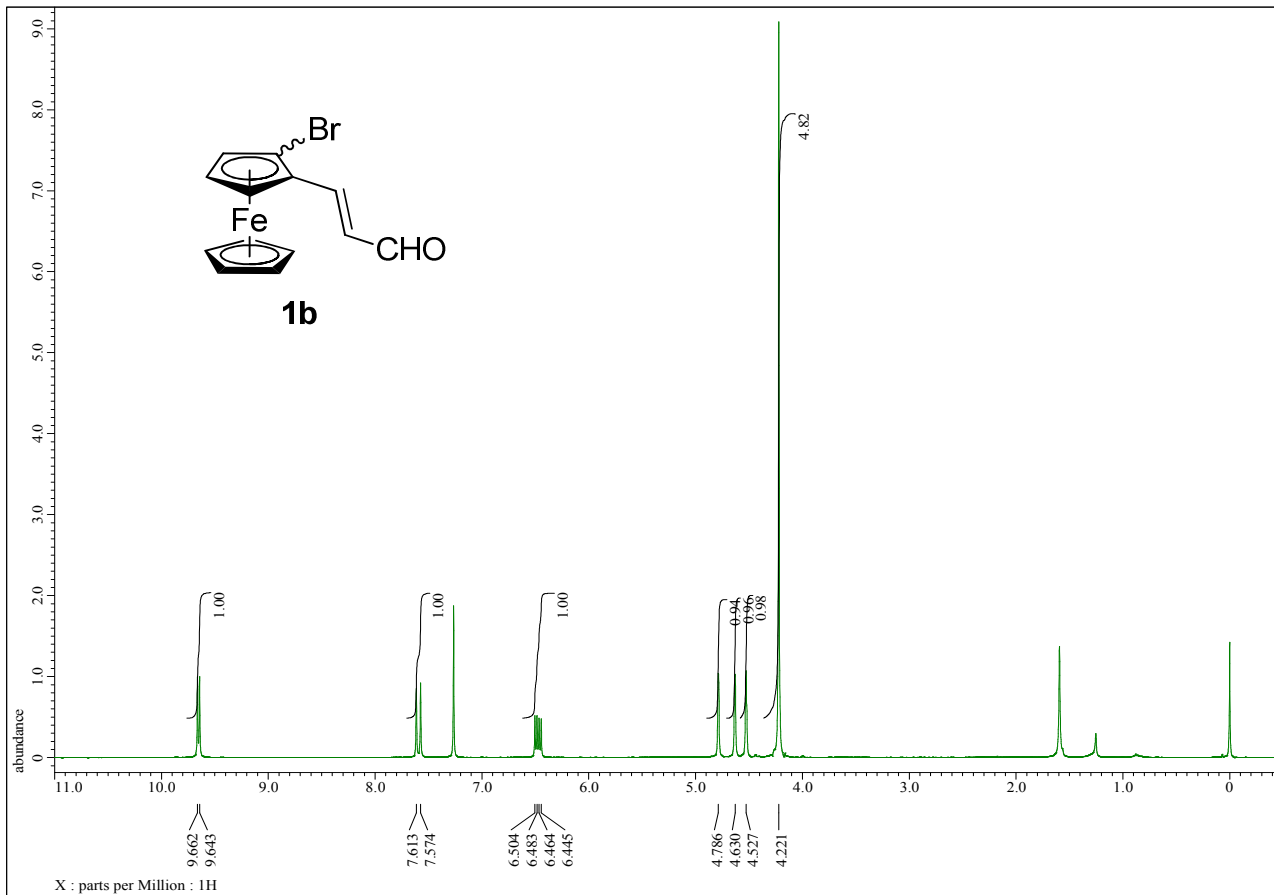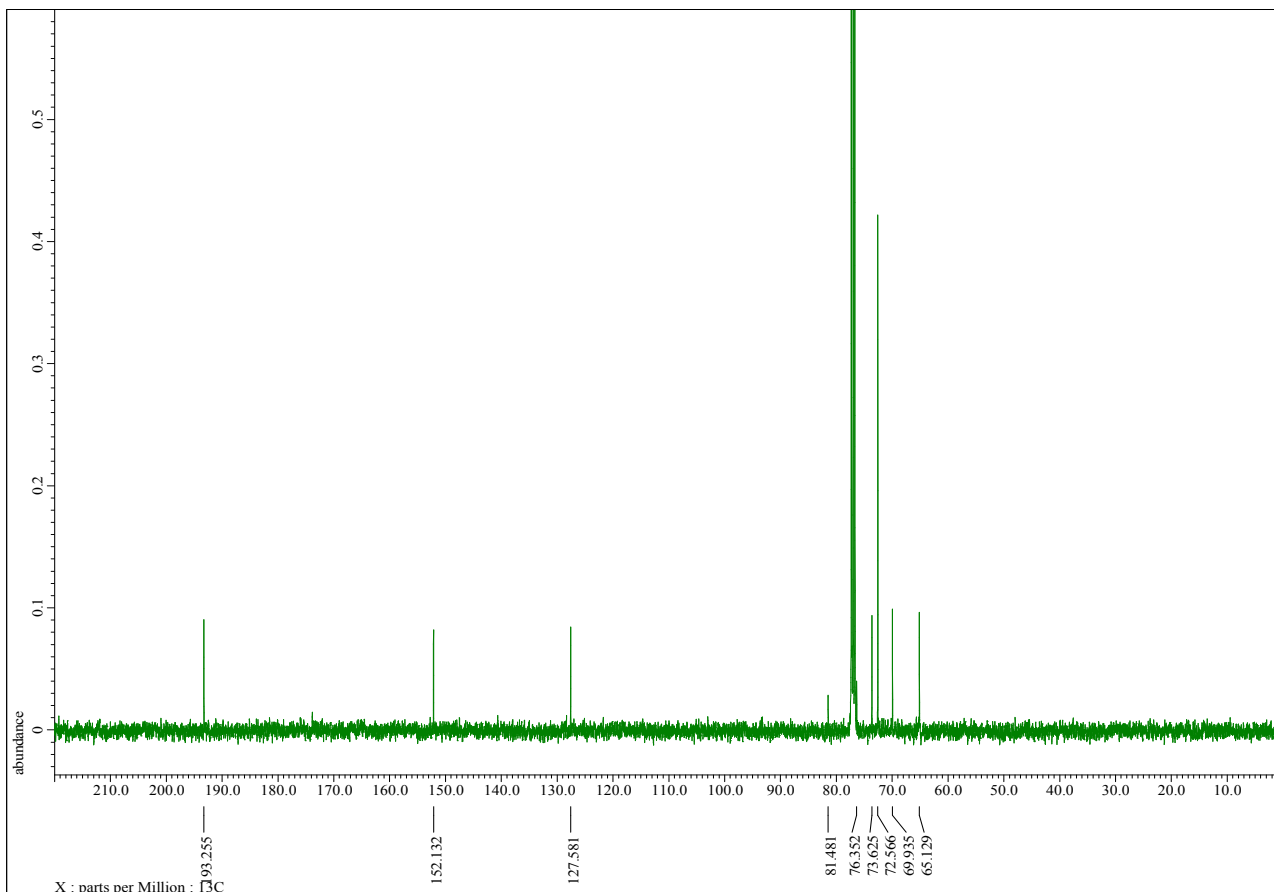

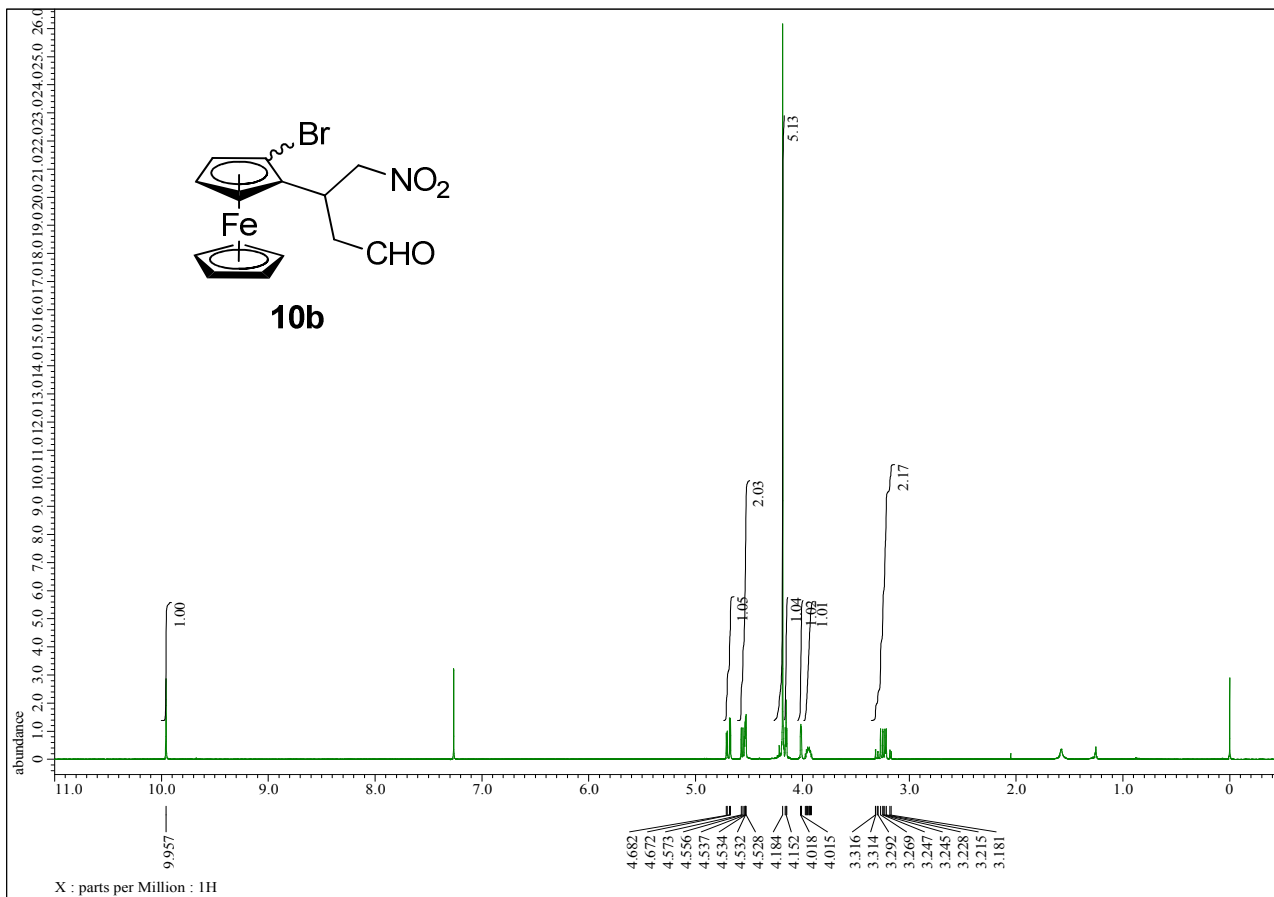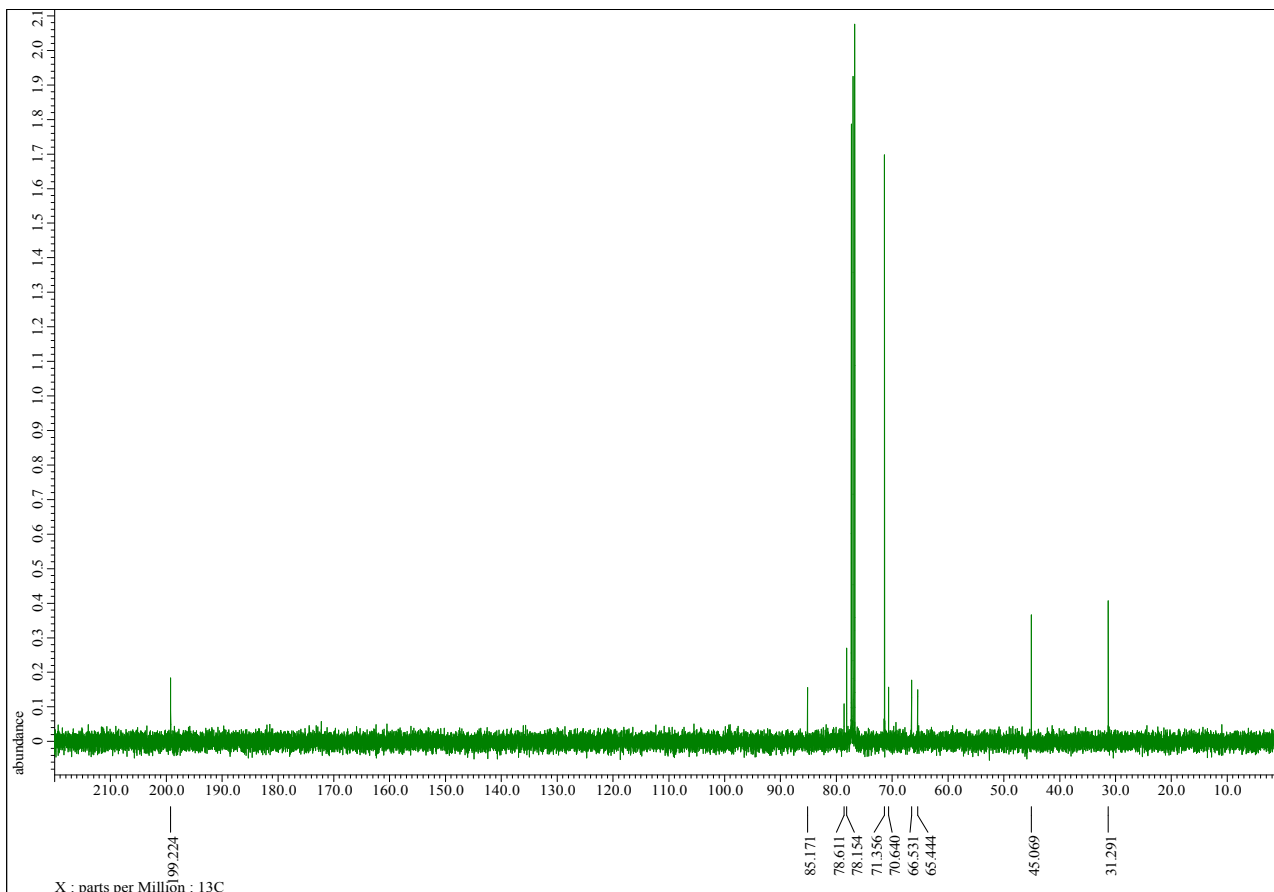



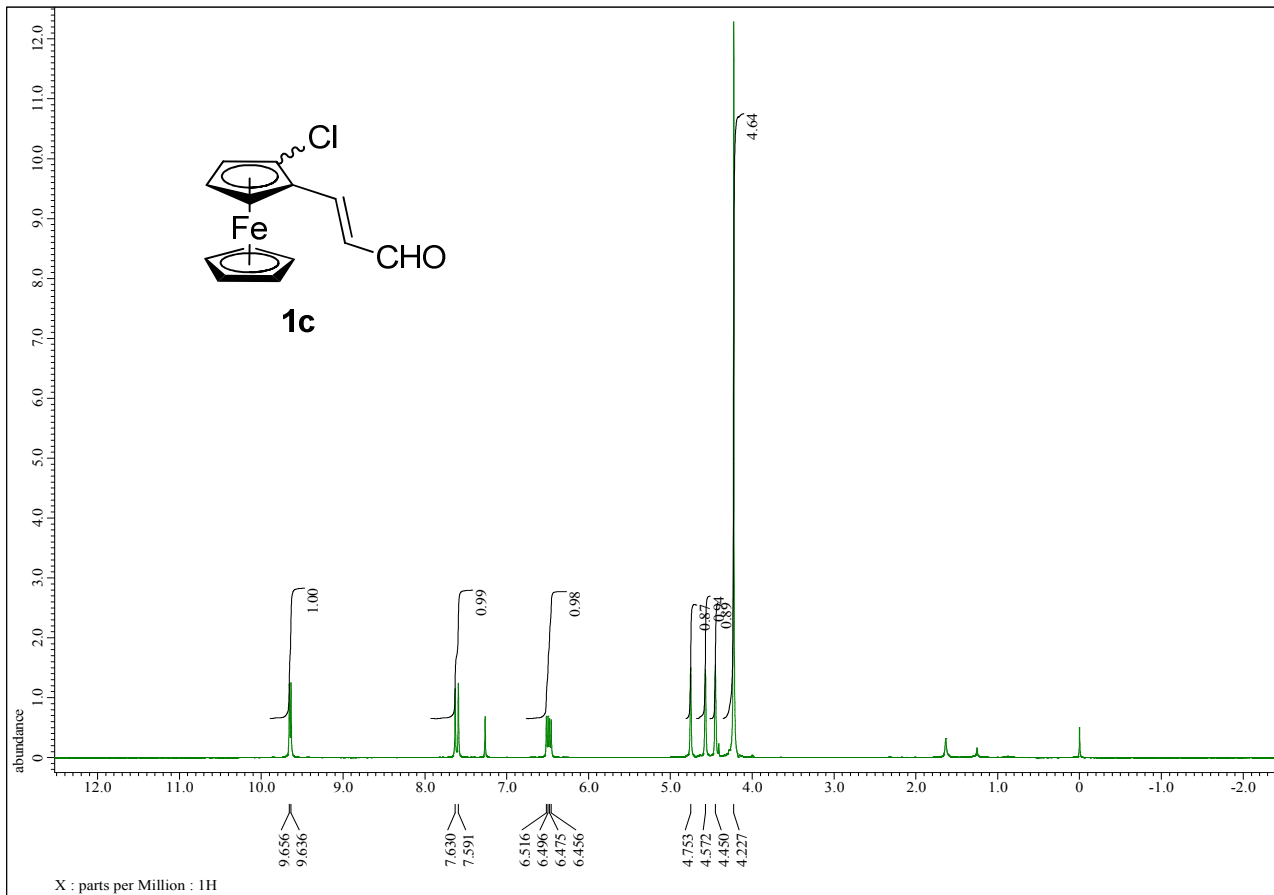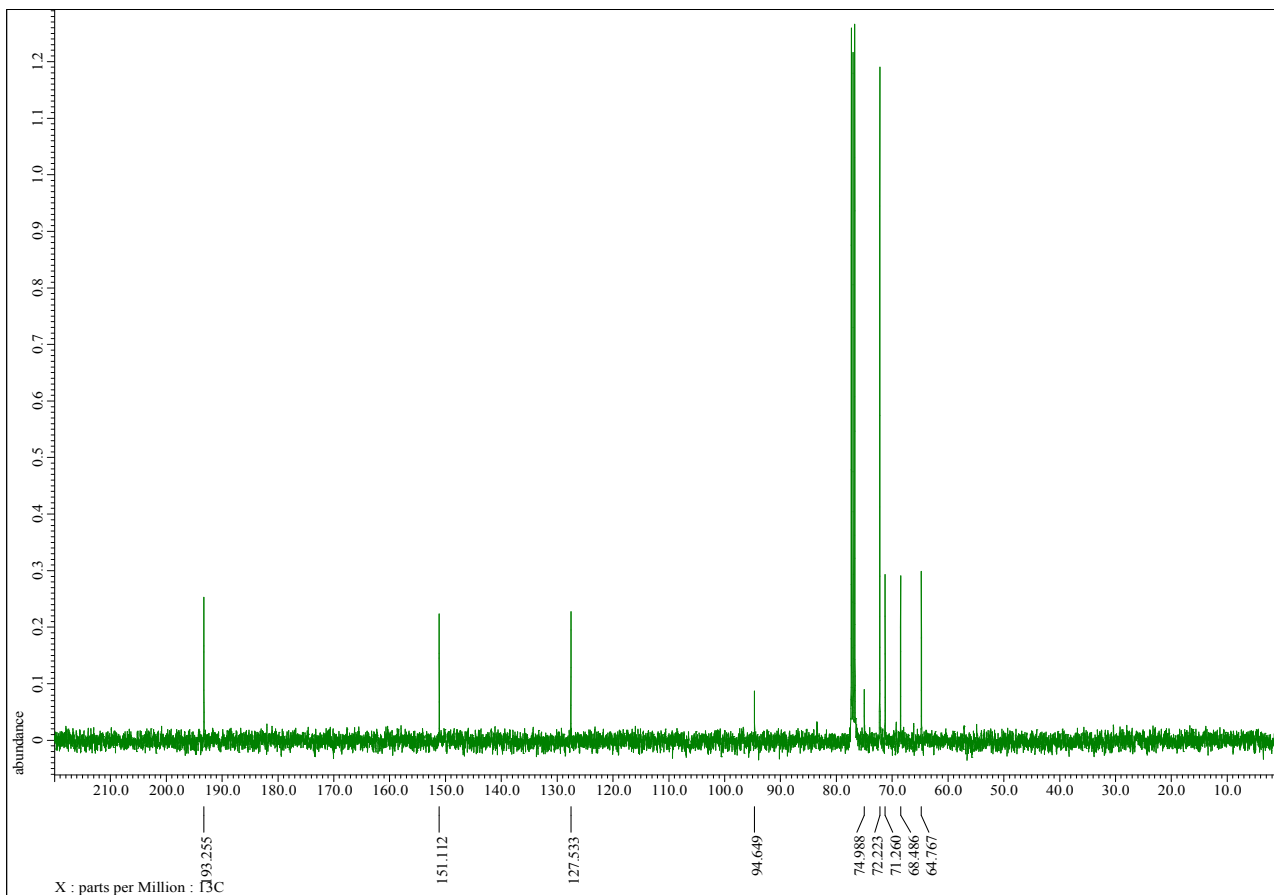

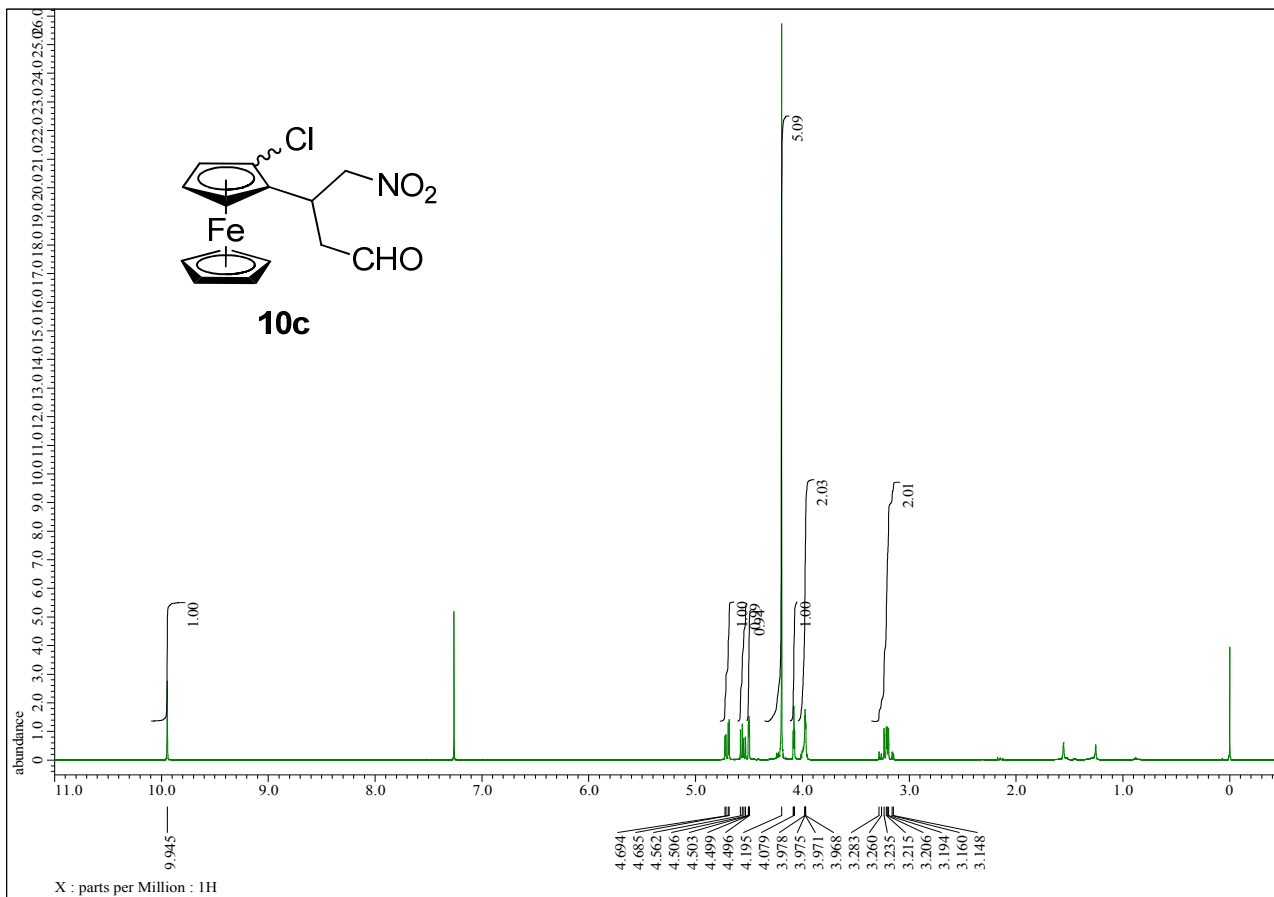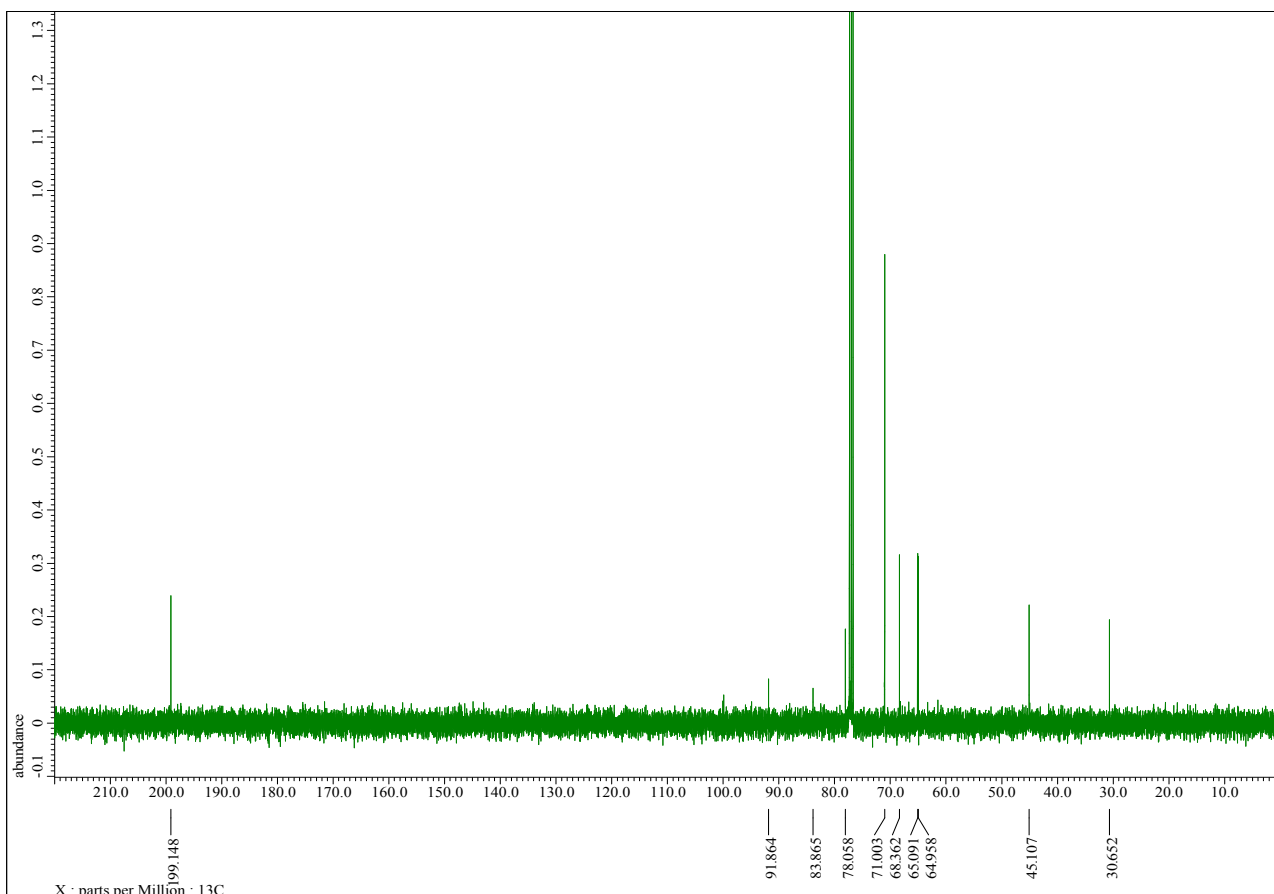

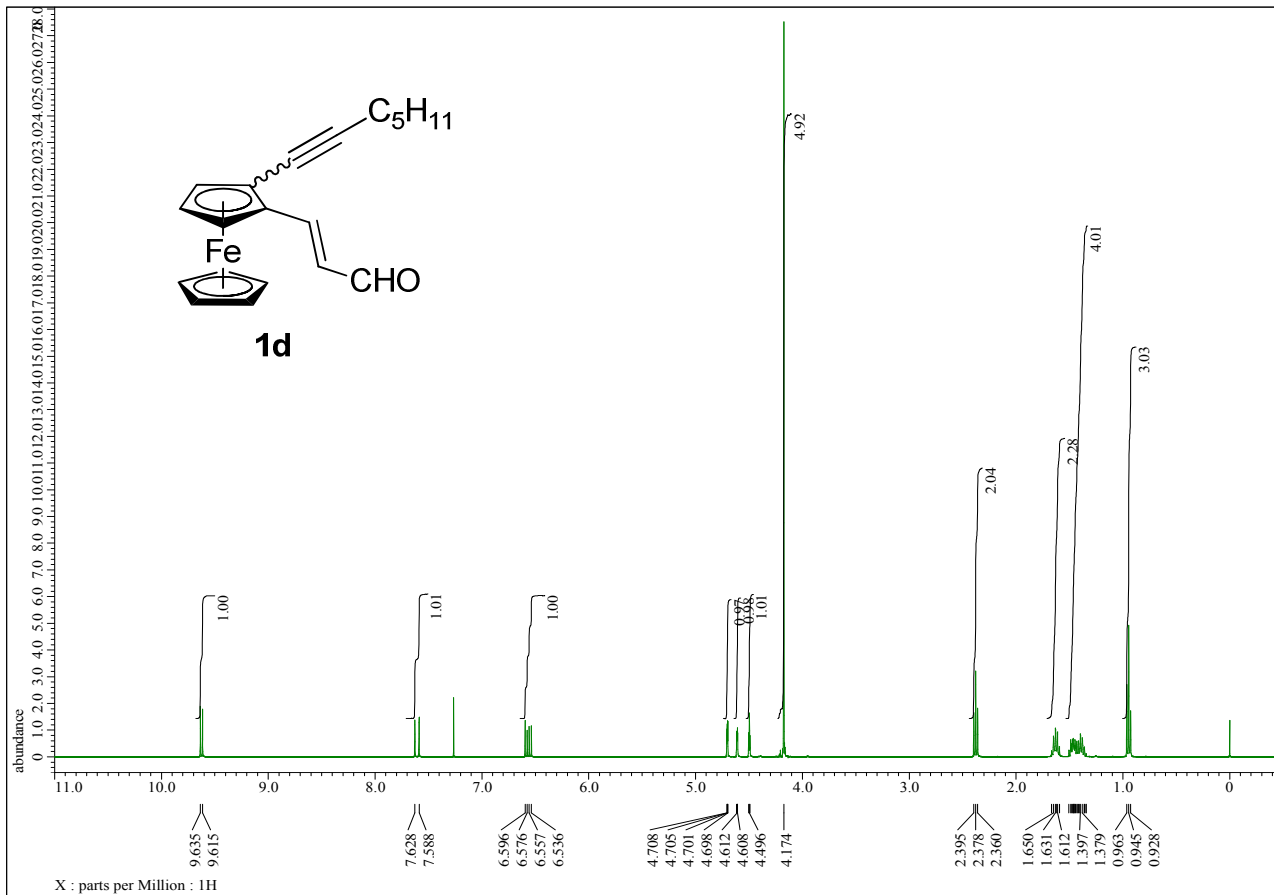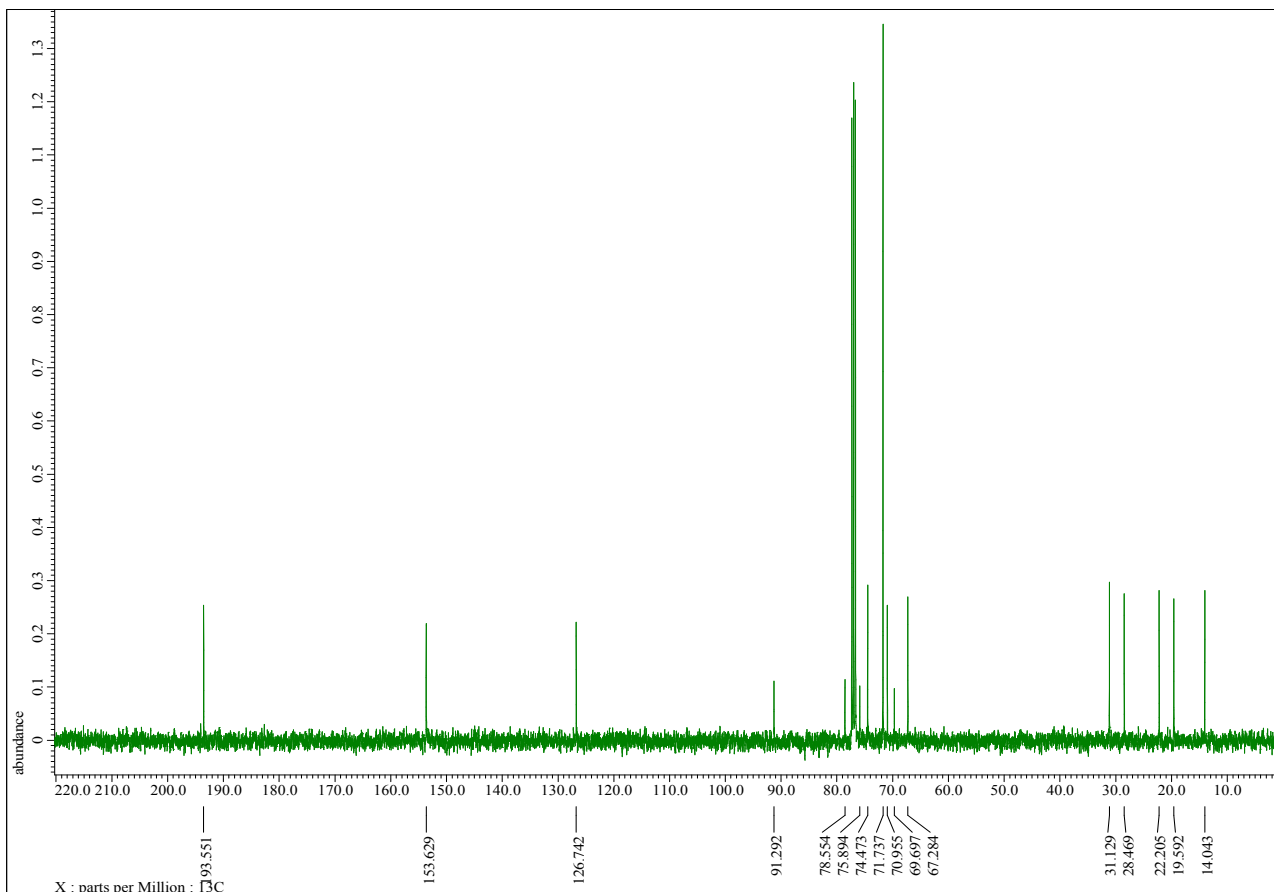

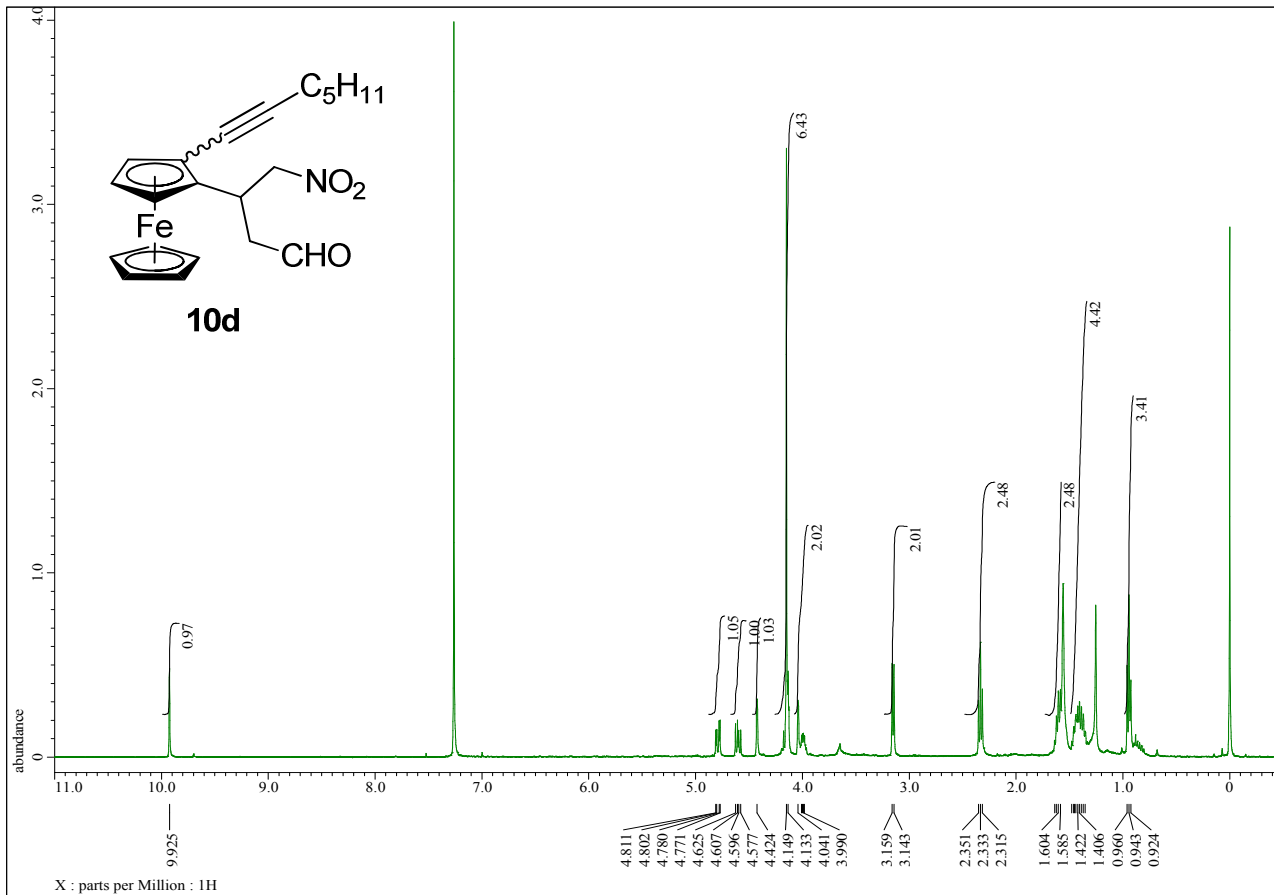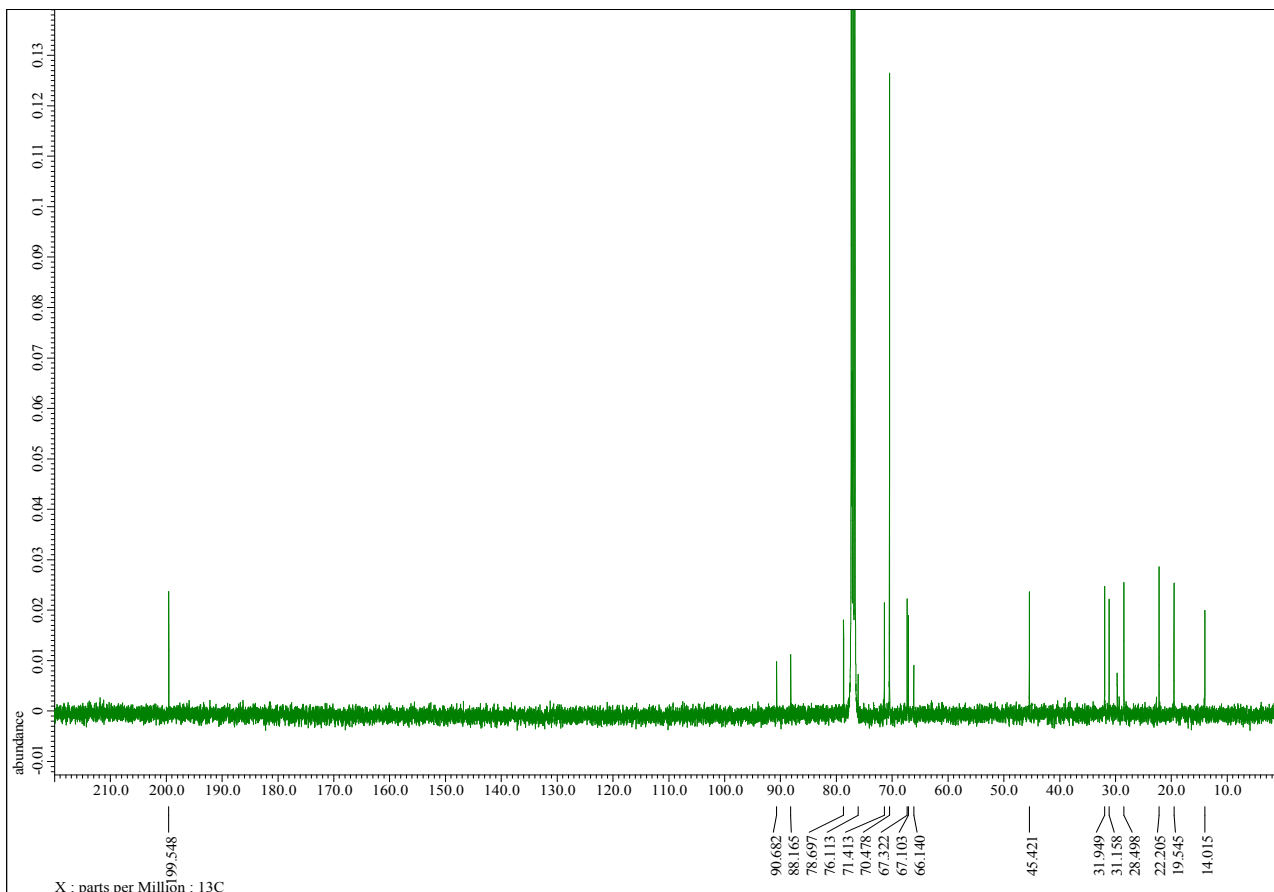

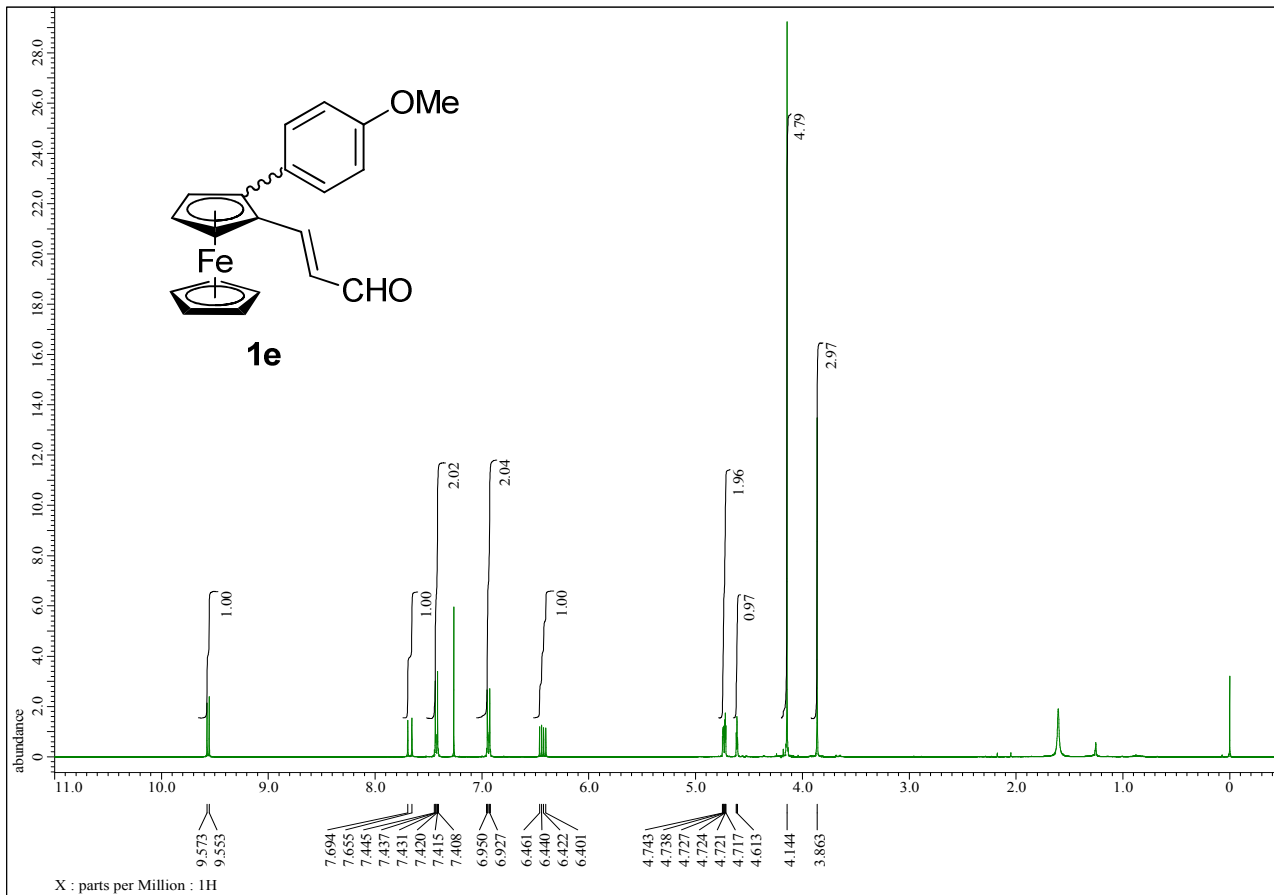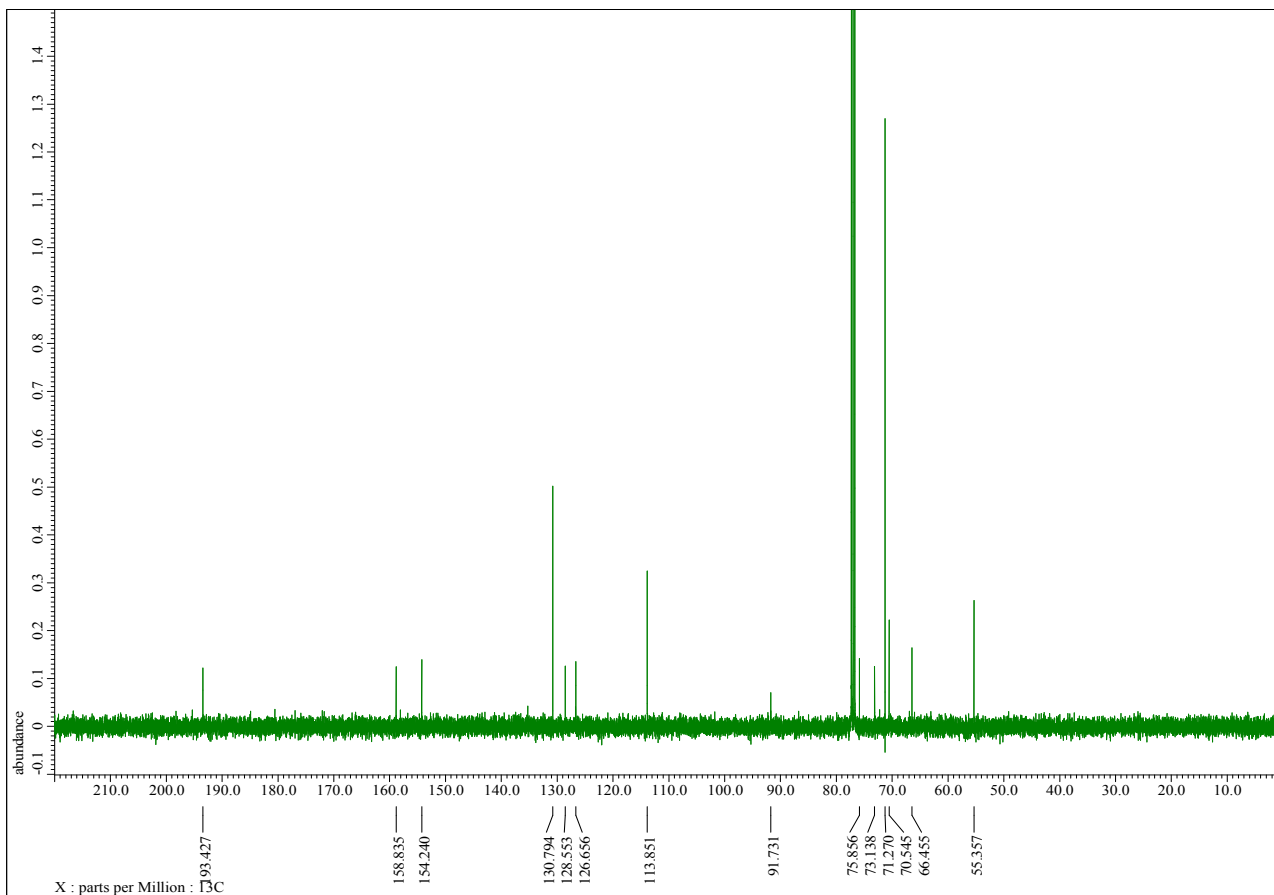

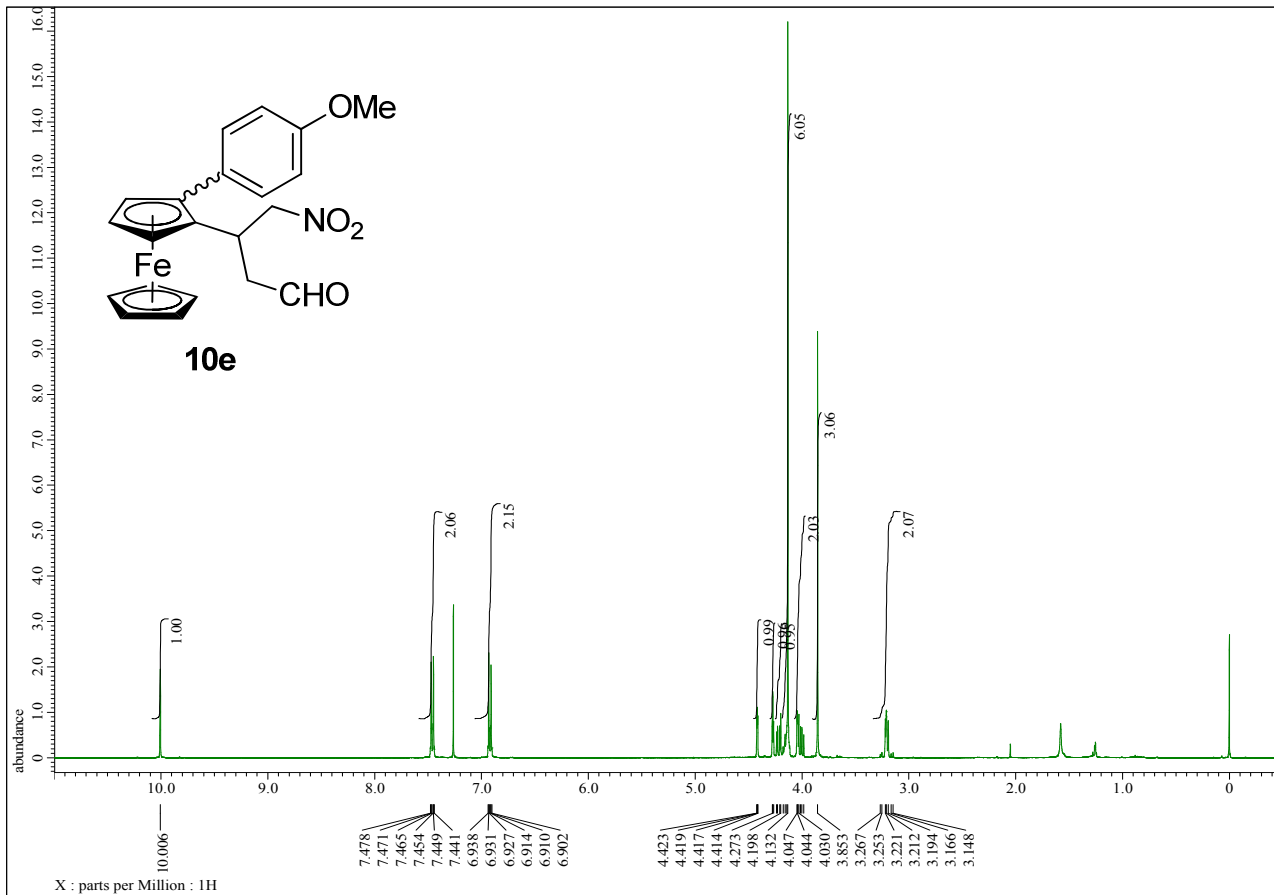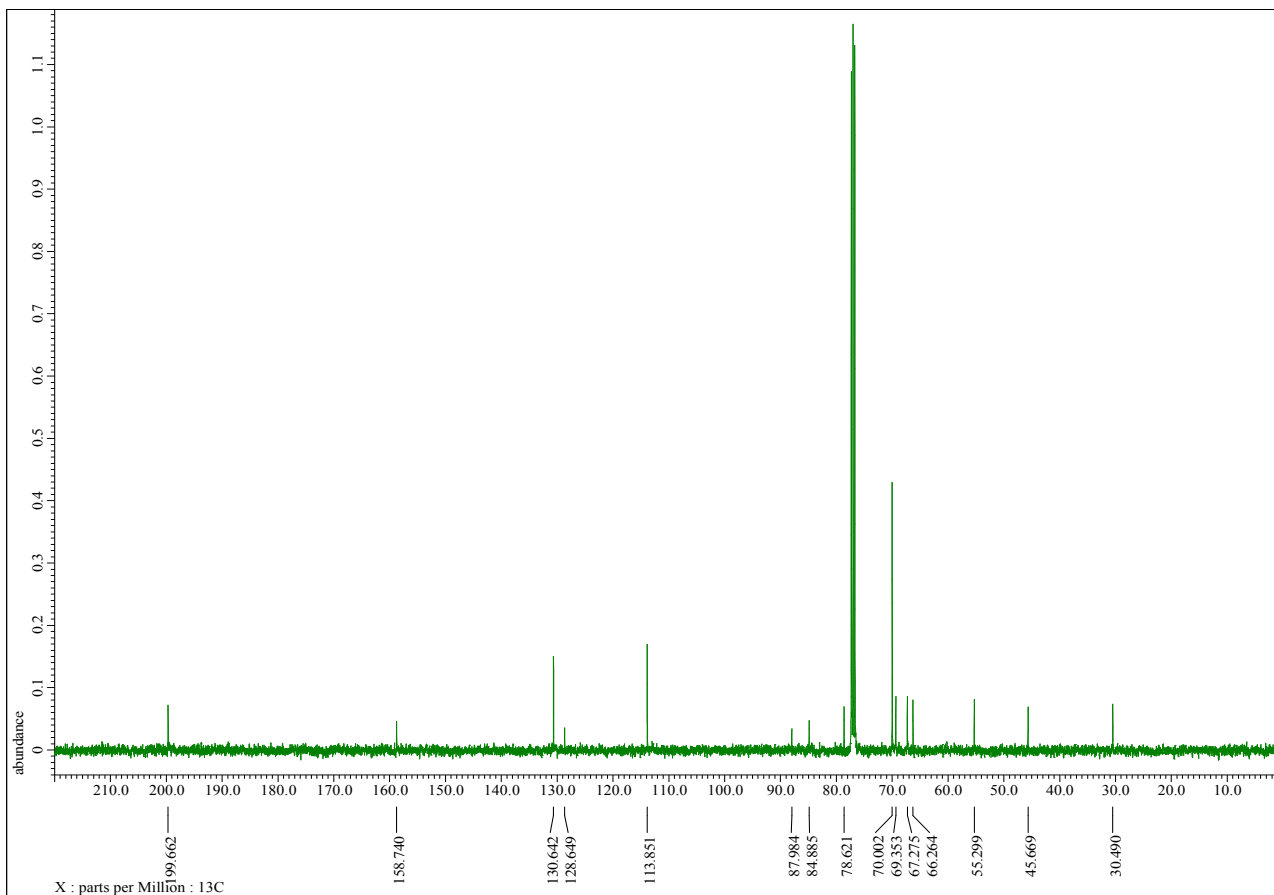

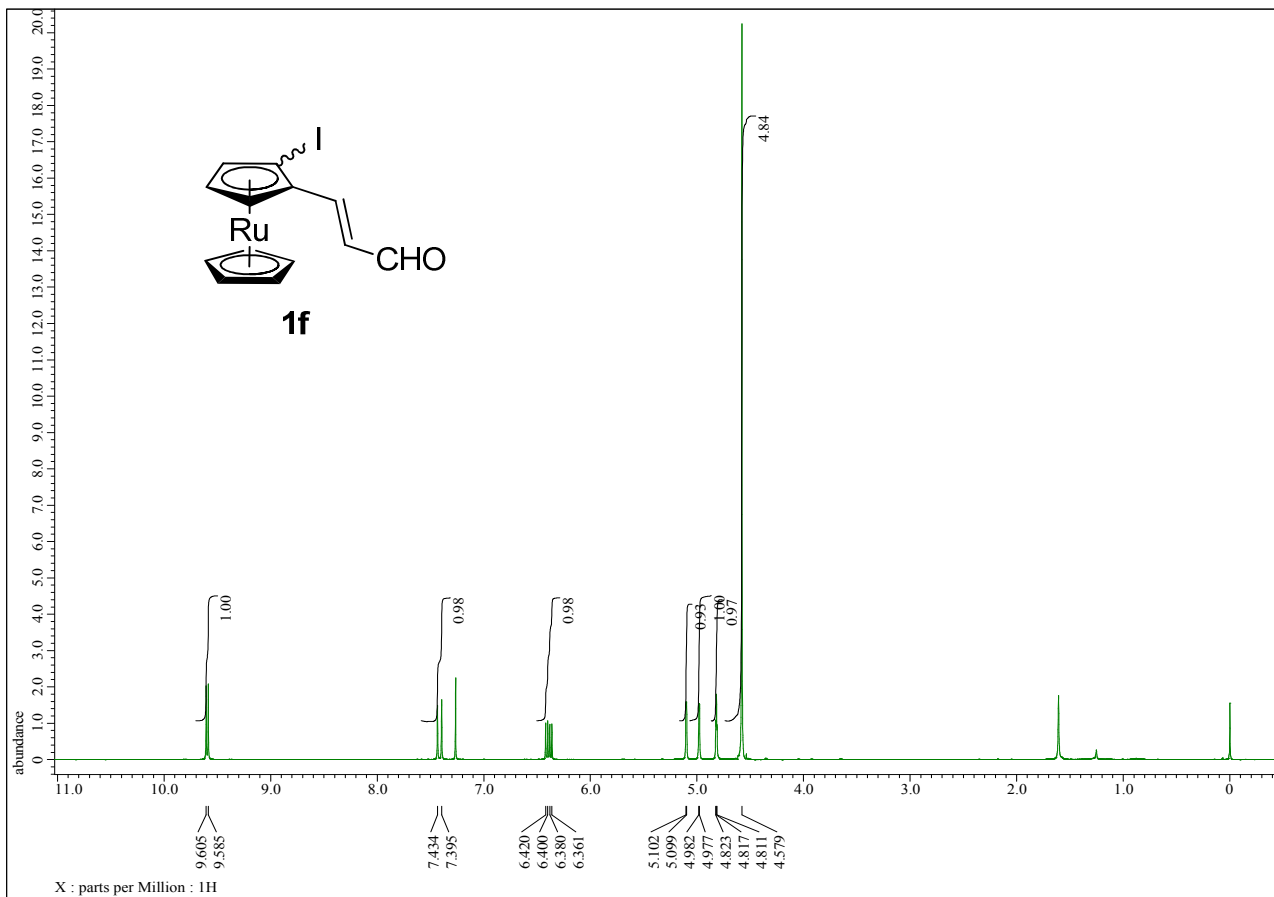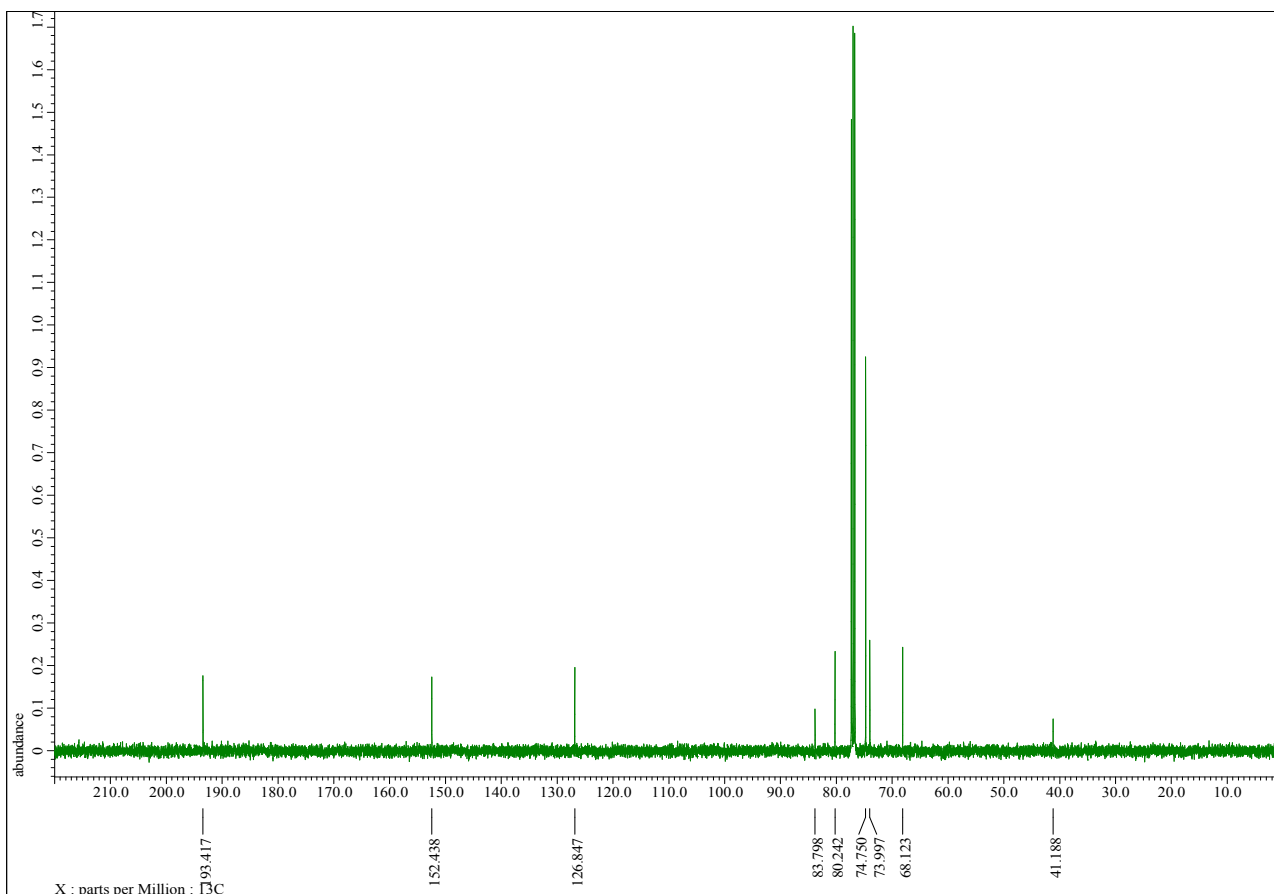

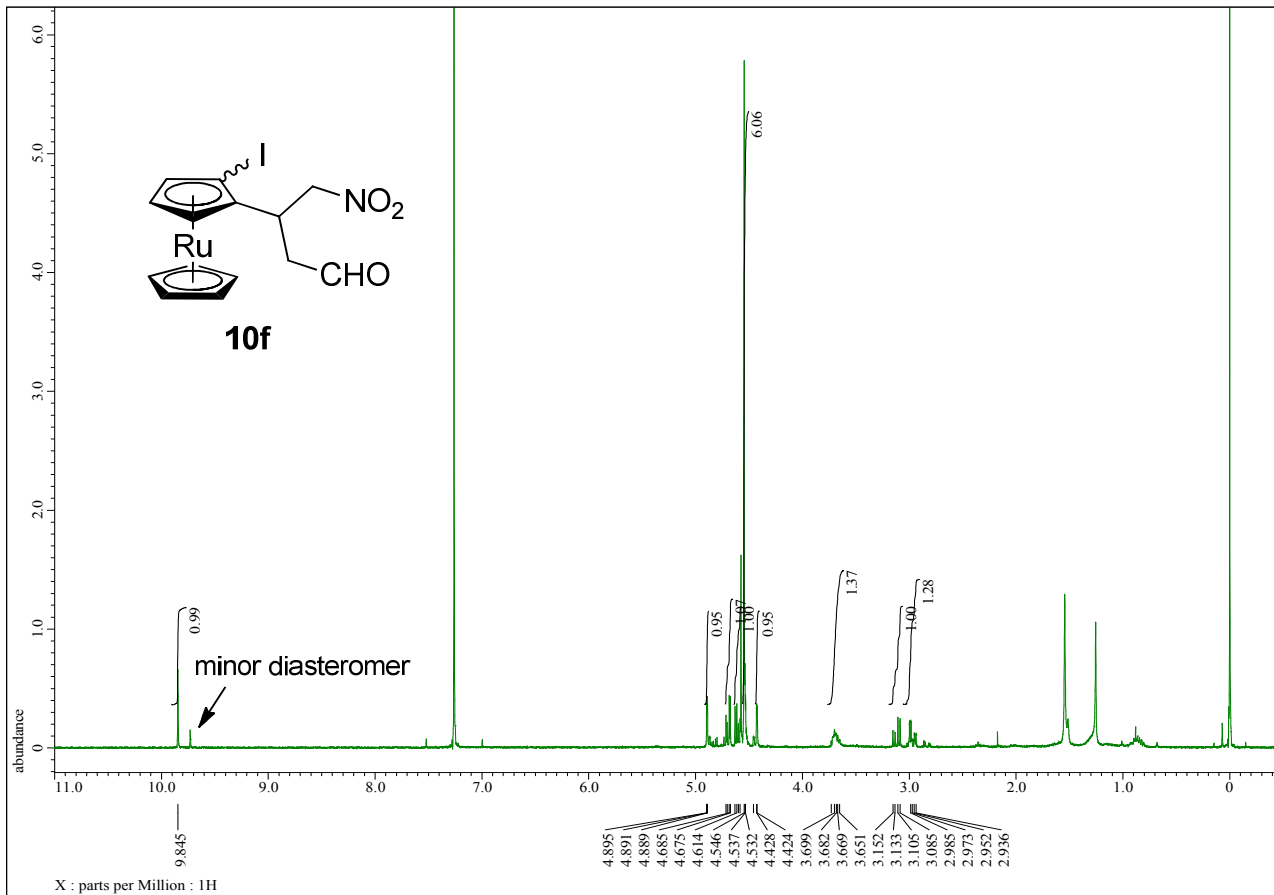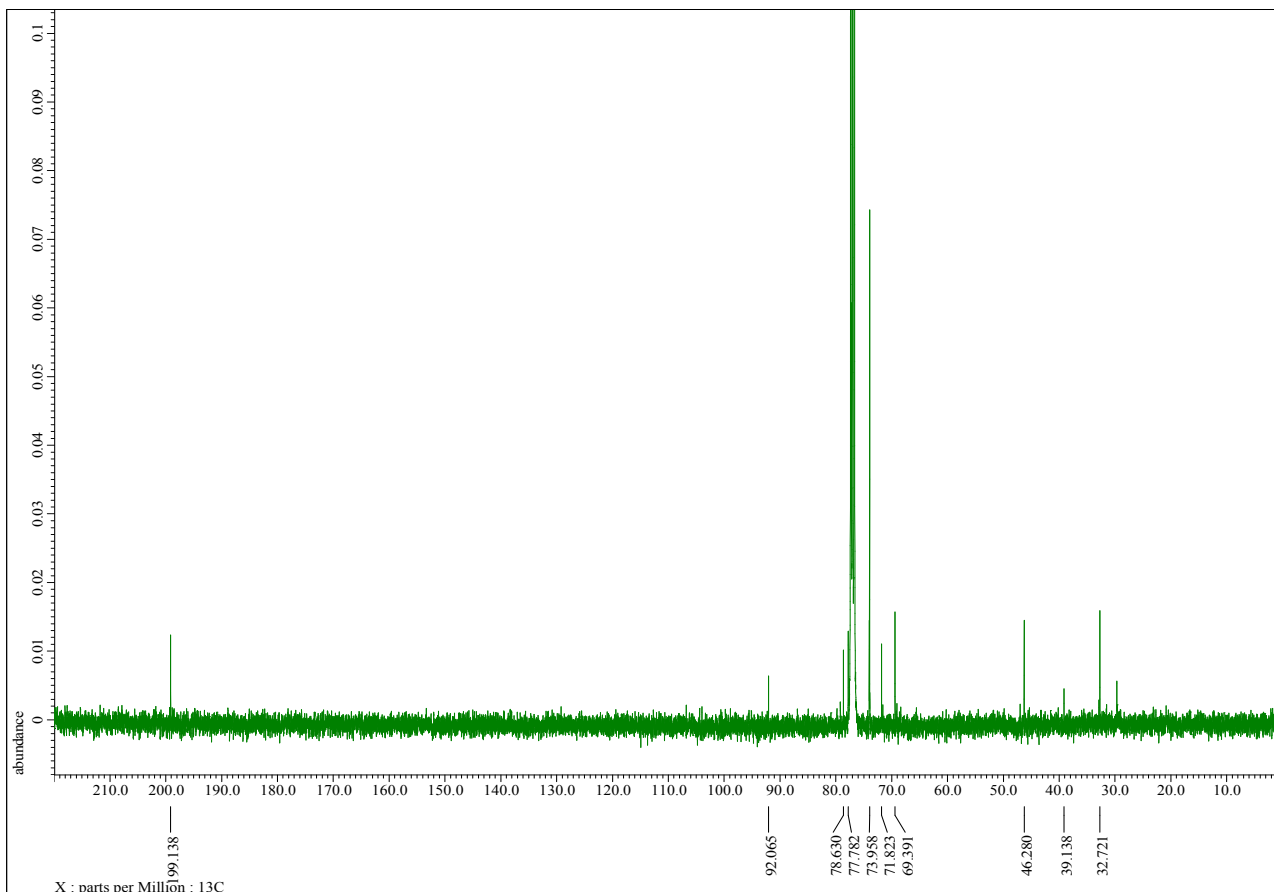



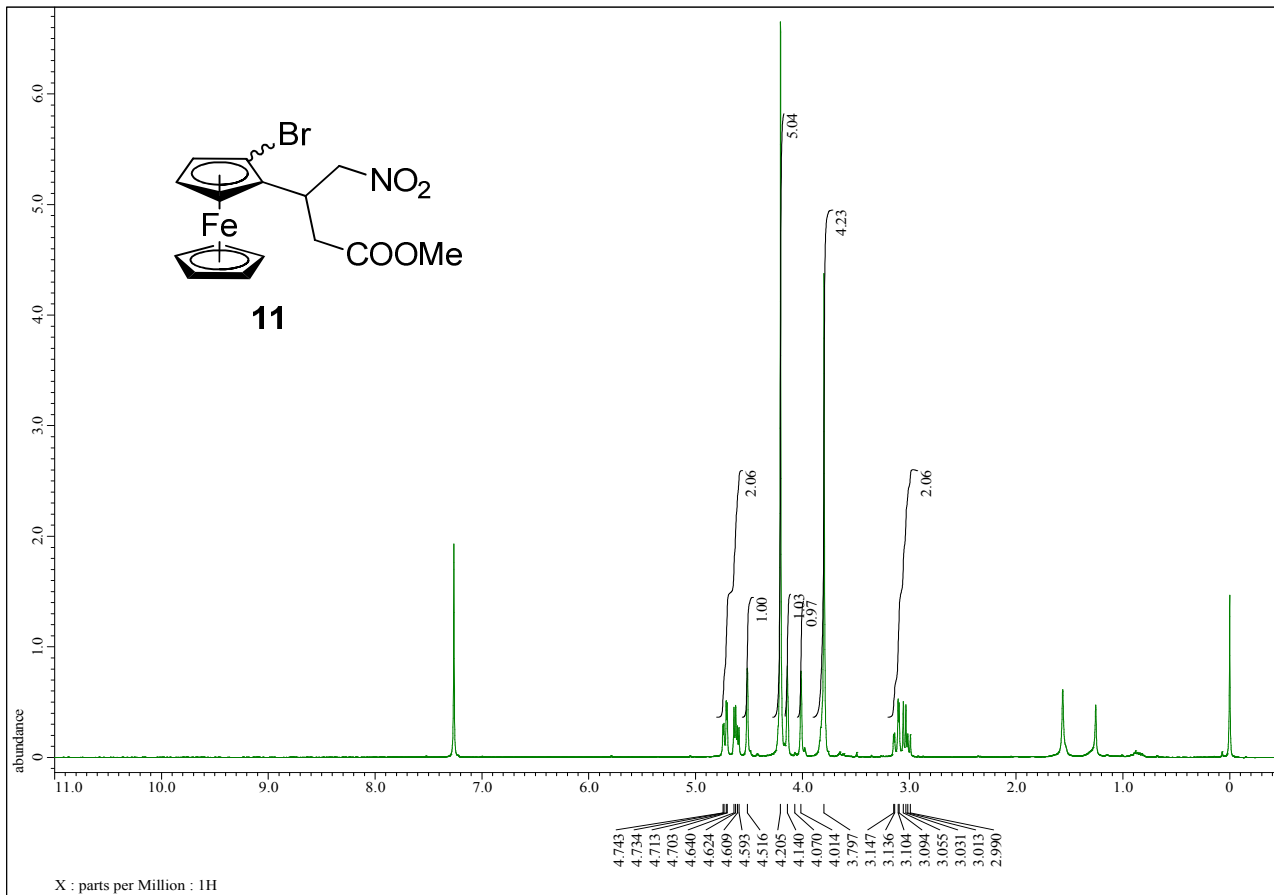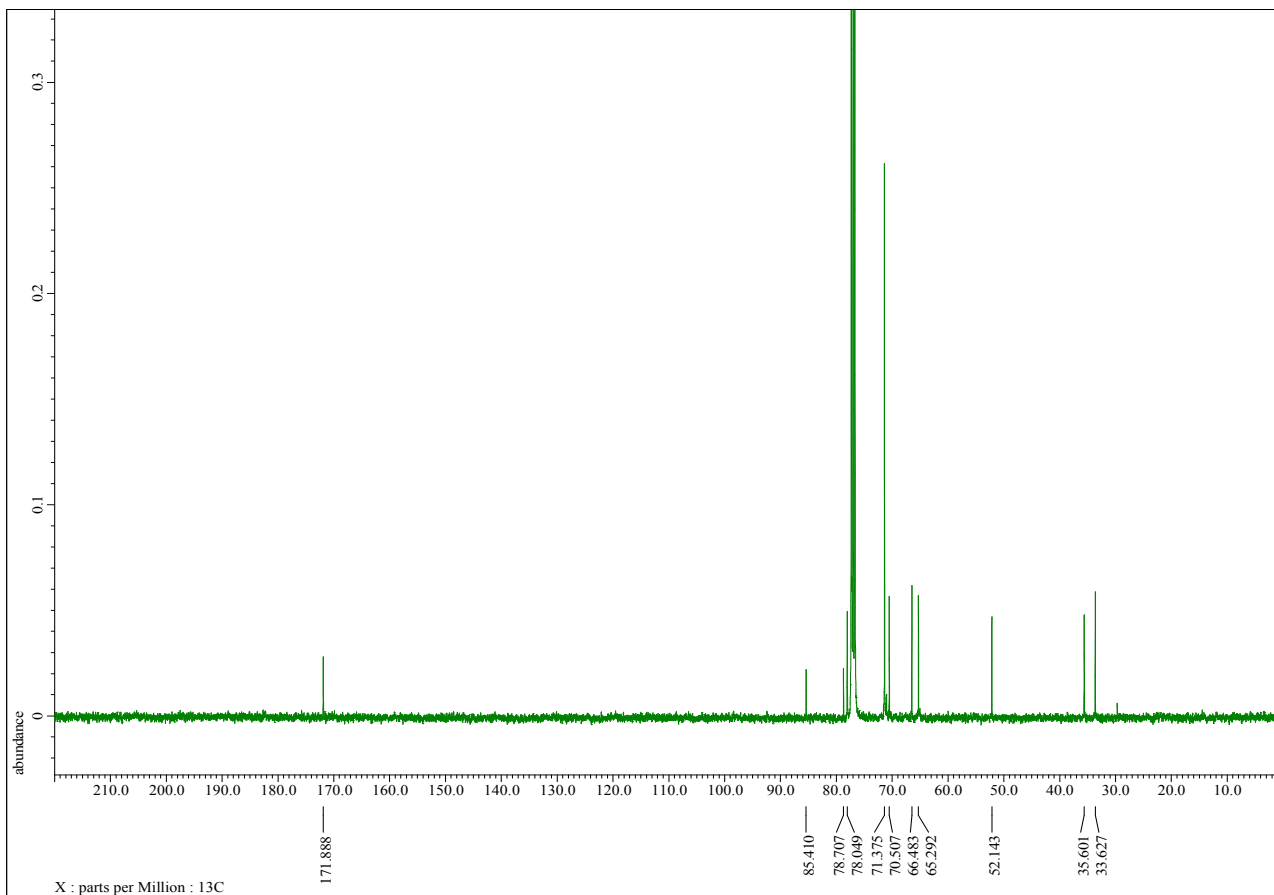

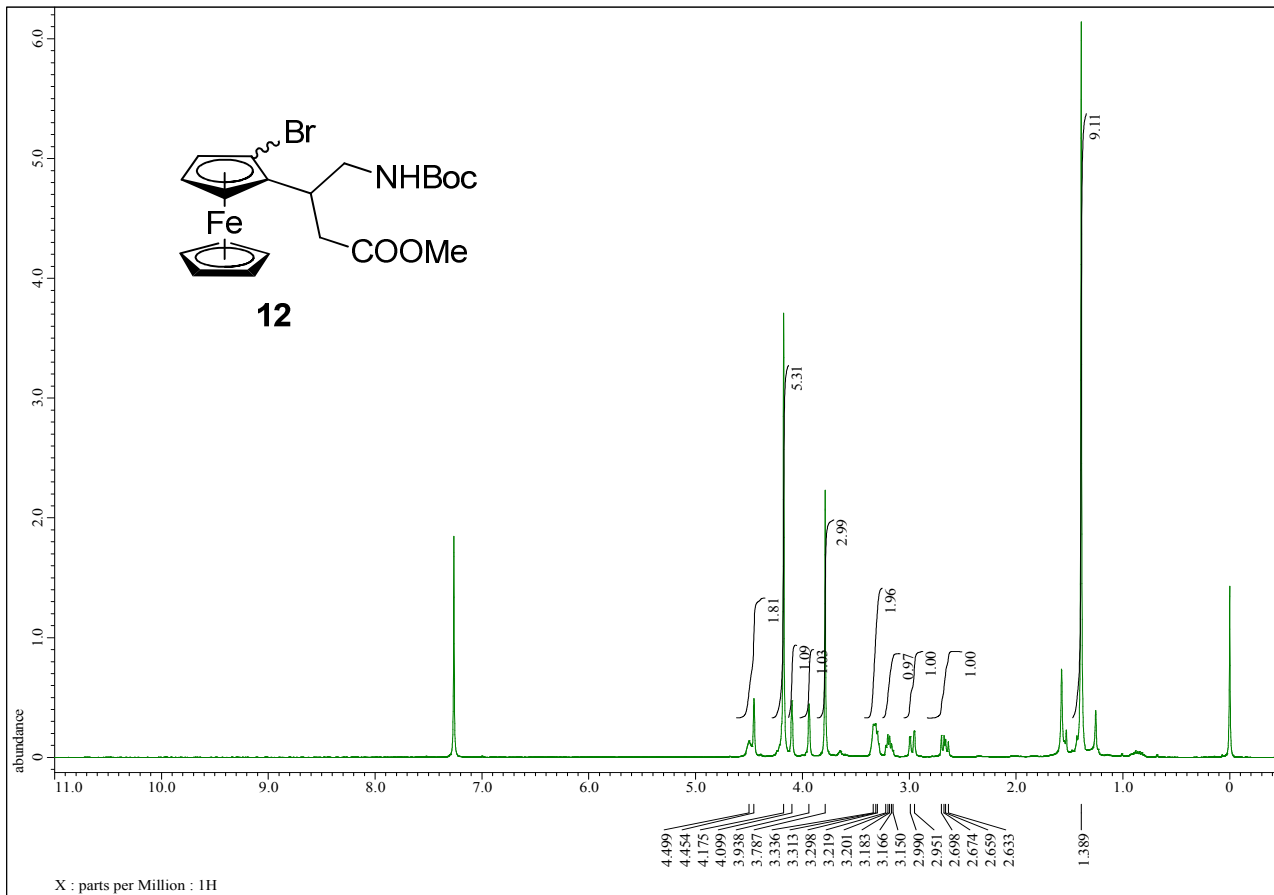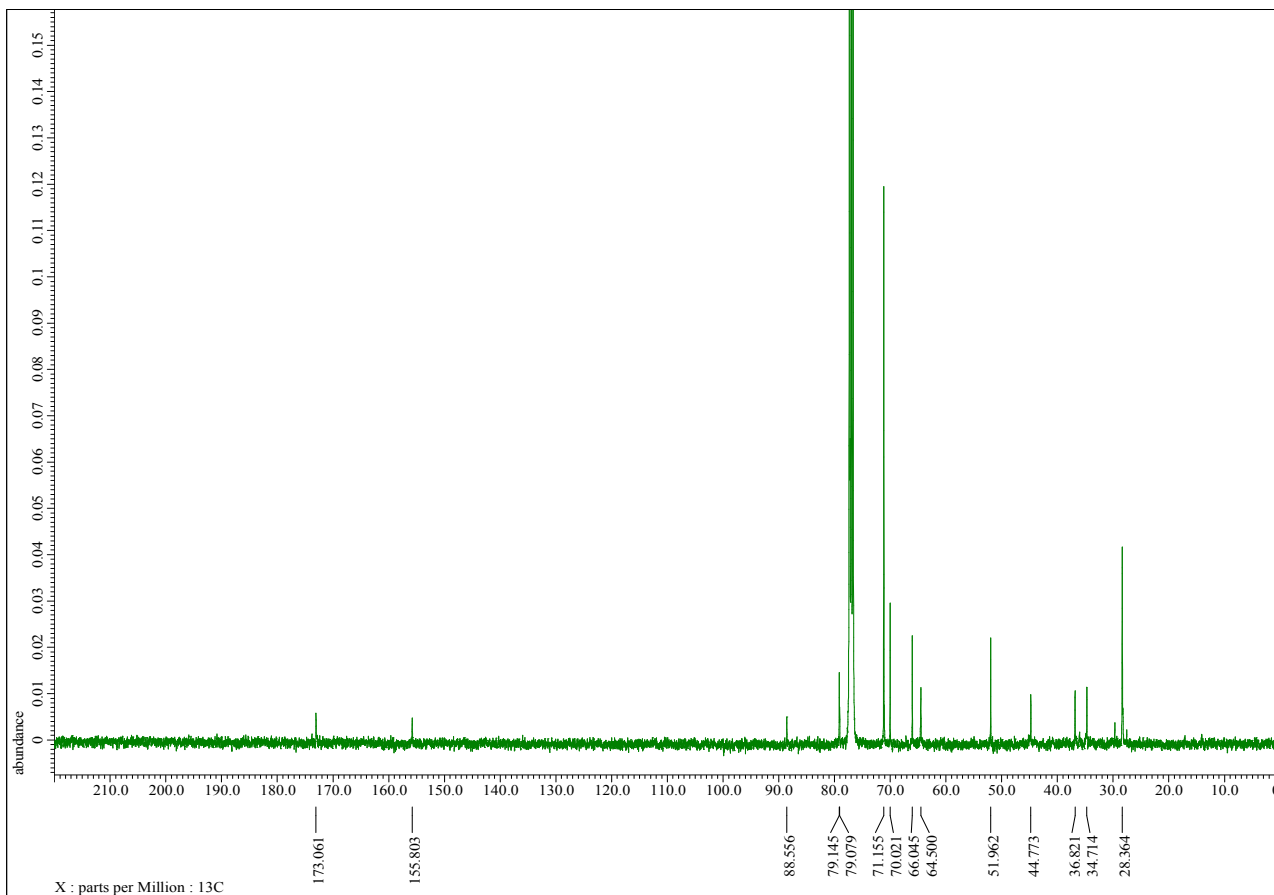

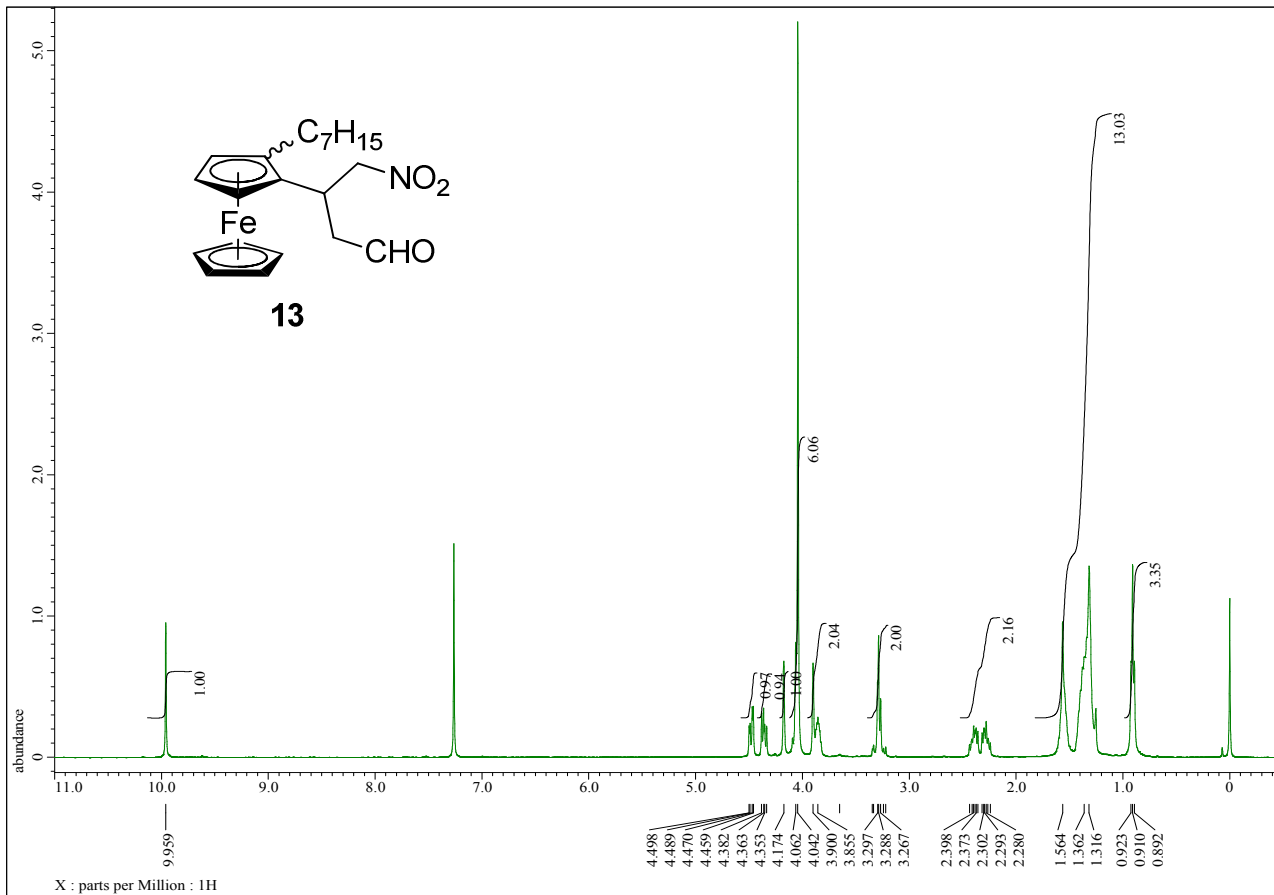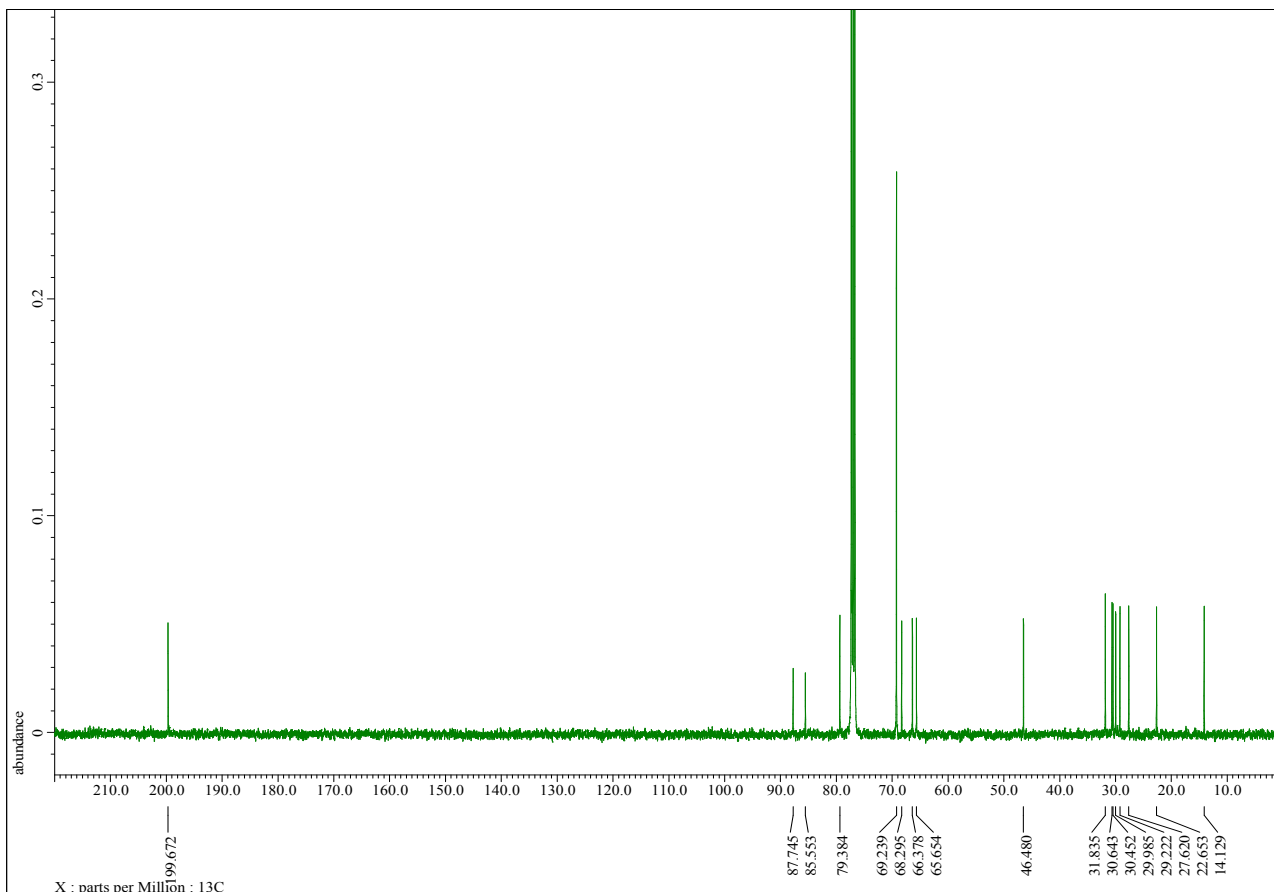

### HPLC traces.

Chiralcel OD-H column, hexane/2-propanol = 90:10, 1.0 mL min<sup>-1</sup>

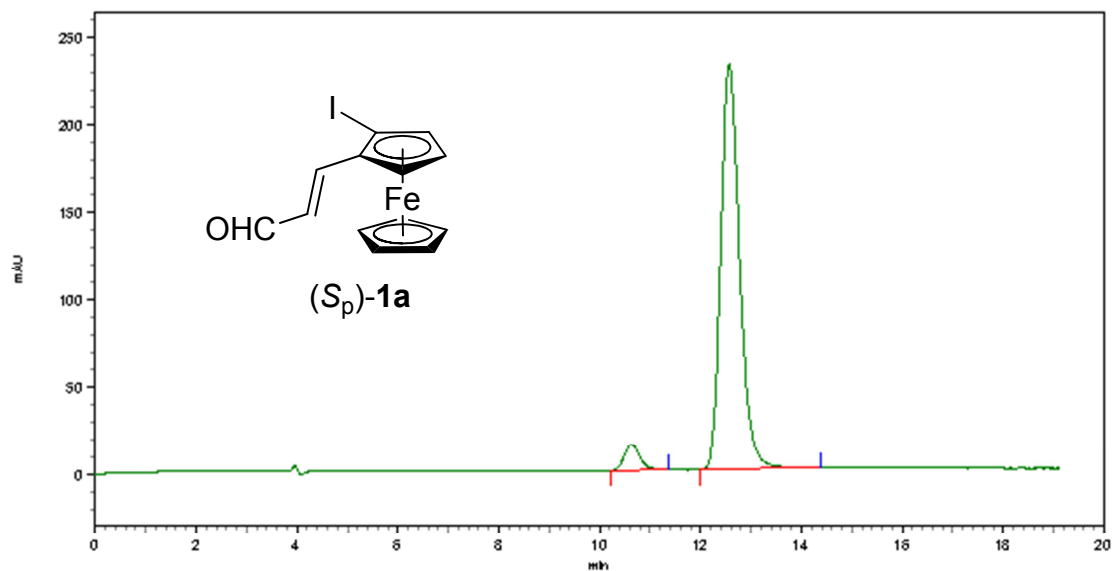

4: 310 nm, 8 nm

| retention time | area    | area%  |
|----------------|---------|--------|
| 10.624         | 327764  | 5.17   |
| 12.564         | 6017898 | 94.83  |
| Total          | 6345662 | 100.00 |

racemic sample

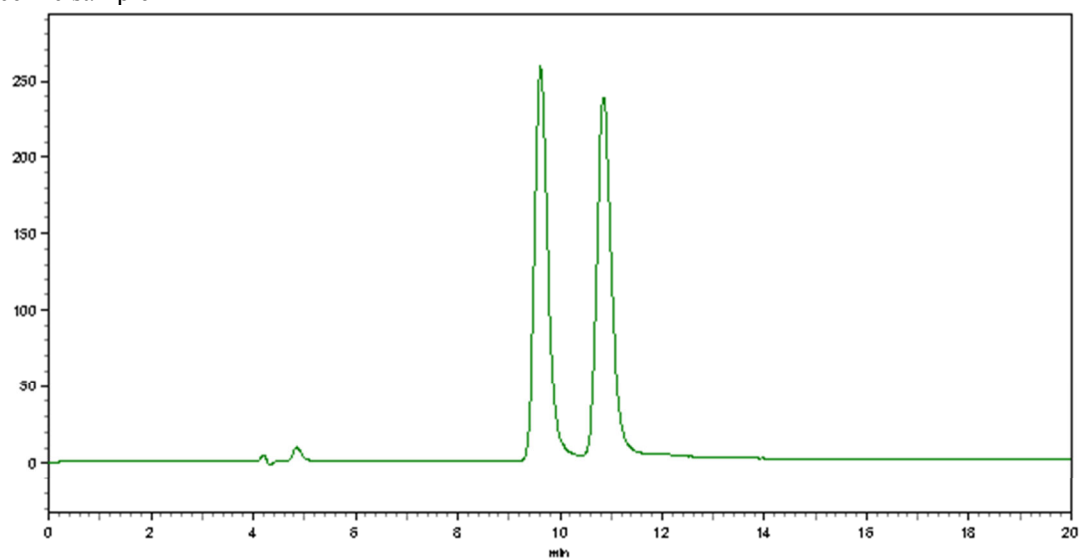

Chiralpak AS-H column, hexane/2-propanol = 90:10, 1.0 mL min<sup>-1</sup>

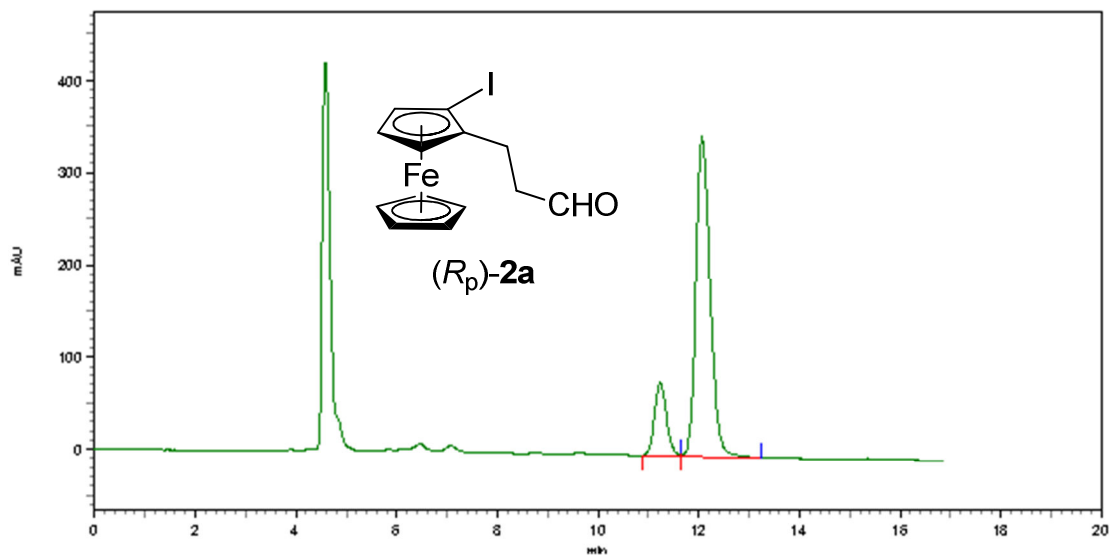

1: 220 nm, 8 nm

| retention time | area    | area% |
|----------------|---------|-------|
| 11.230         | 1297543 | 16.05 |
| 12.056         | 6784999 | 83.95 |

| Total | area    | area%  |
|-------|---------|--------|
|       | 8082543 | 100.00 |

racemic sample

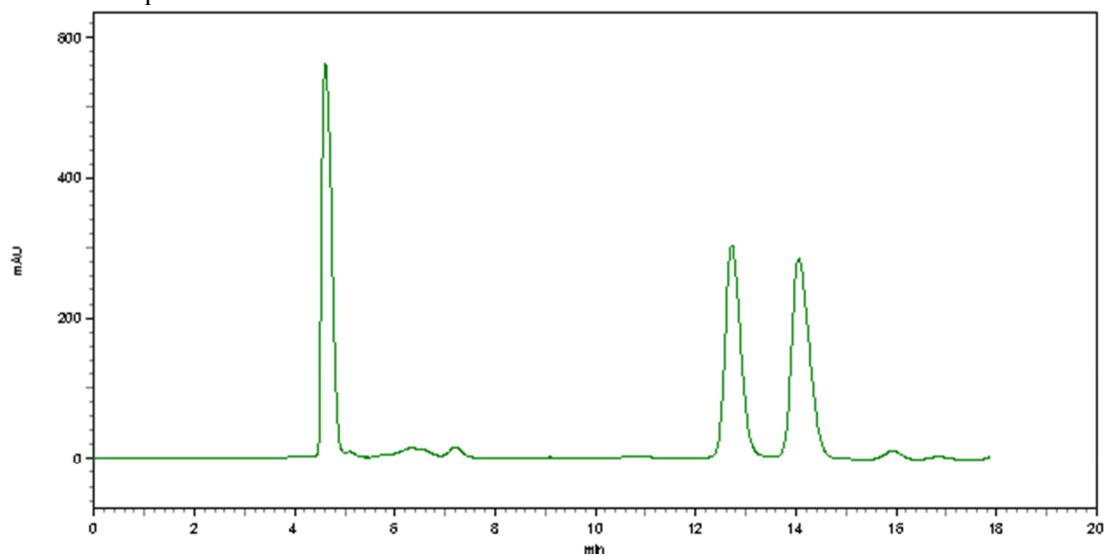

Chiralcel OJ-H column, hexane/2-propanol = 70:30, 0.8 mL min<sup>-1</sup>

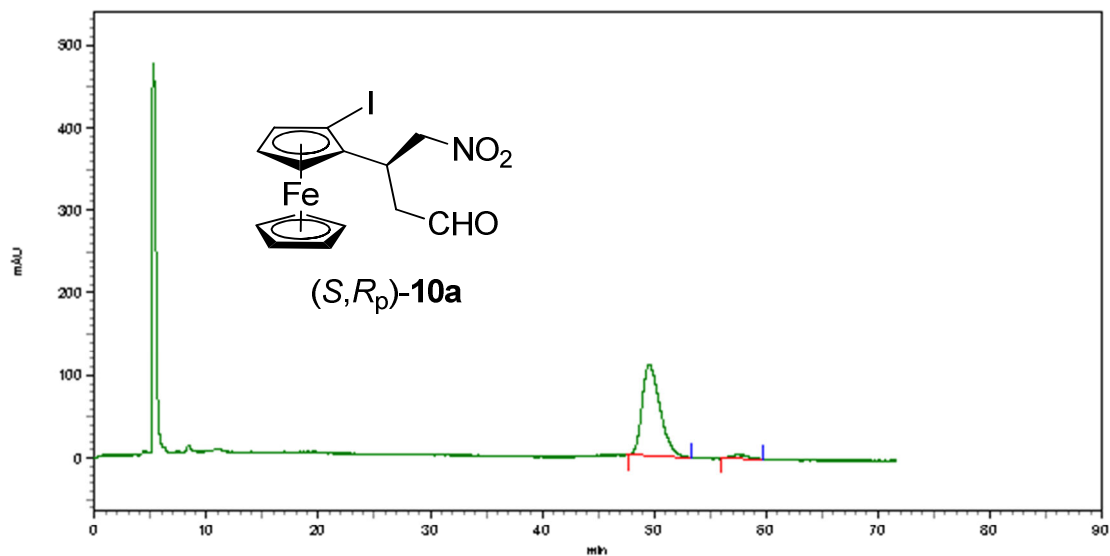

3: 210 nm, 8 nm

| retention time | area     | area%  |
|----------------|----------|--------|
| 49.525         | 12529310 | 95.94  |
| 57.611         | 530033   | 4.06   |
| Total          | 13059343 | 100.00 |

racemic sample

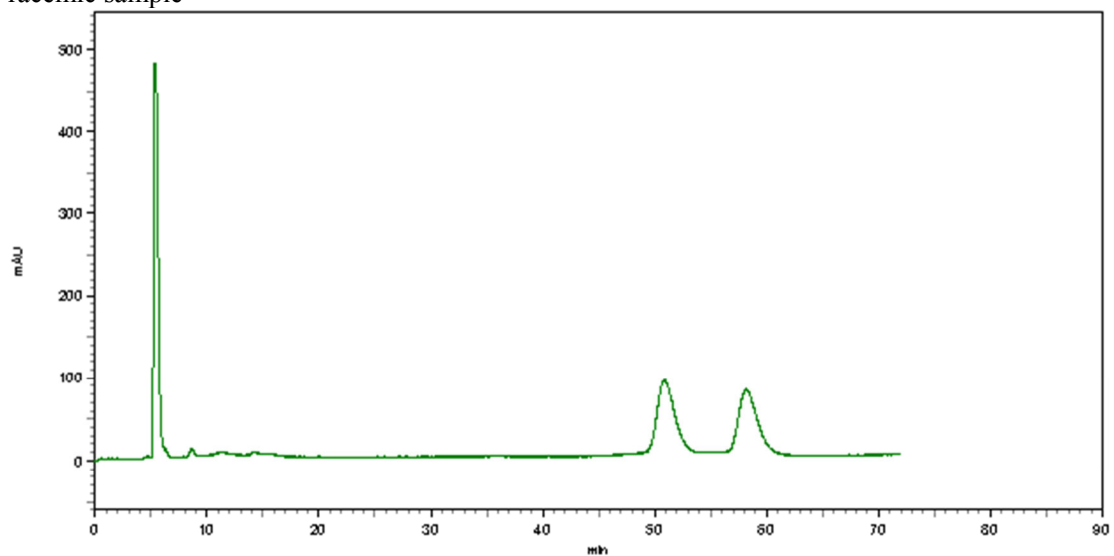

Chiralcel OD-H column, hexane/2-propanol = 90:10, 1.0 mL min<sup>-1</sup>

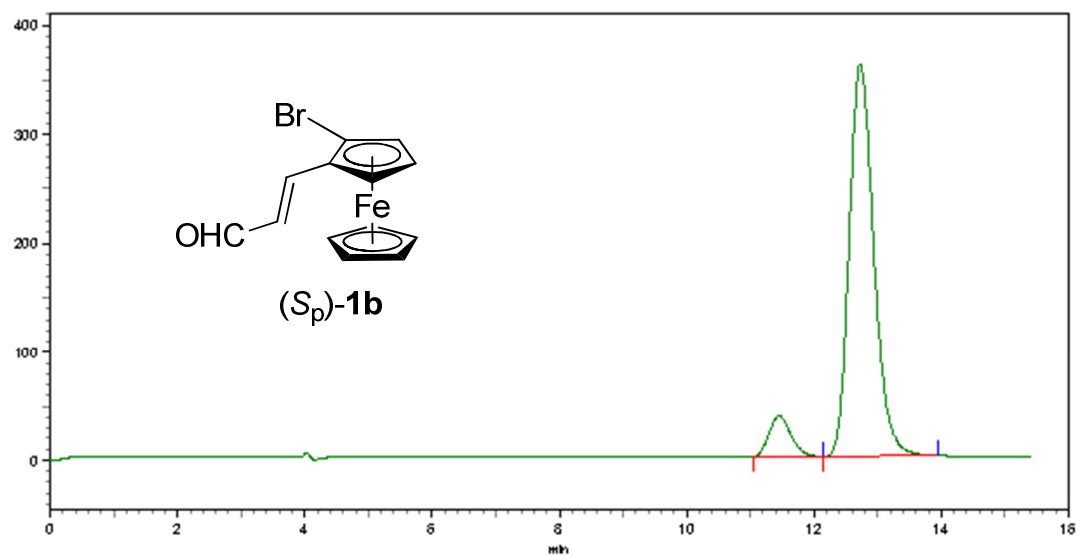

3: 310 nm, 8 nm

| retention time | area     | area%  |
|----------------|----------|--------|
| 11.445         | 907730   | 8.56   |
| 12.723         | 9698606  | 91.44  |
| Total          | 10606335 | 100.00 |

racemic sample

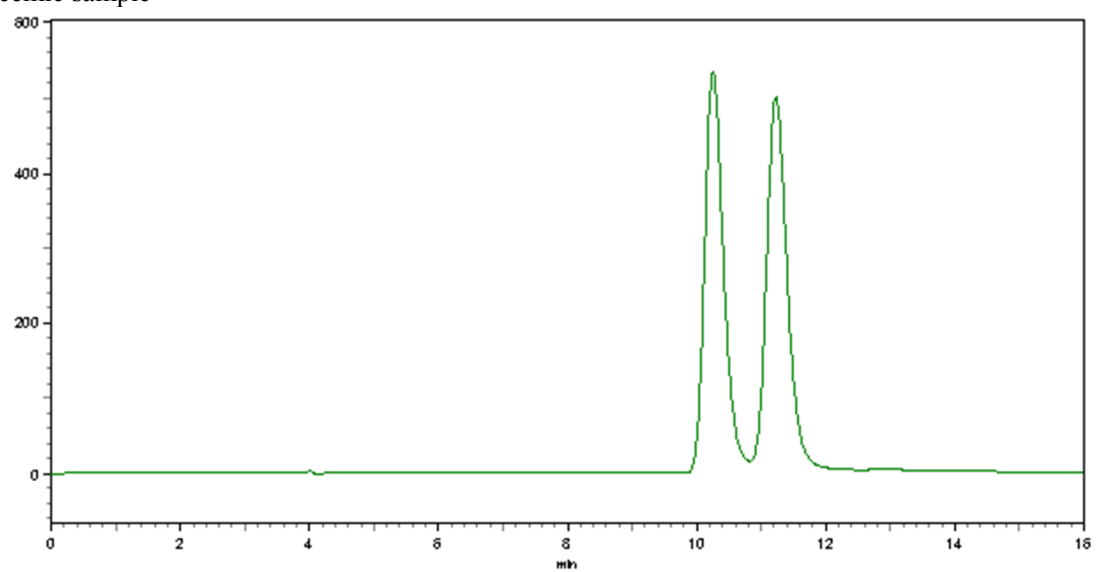

Chiralcel OJ-H column, hexane/2-propanol = 70:30, 0.8 mL min<sup>-1</sup>

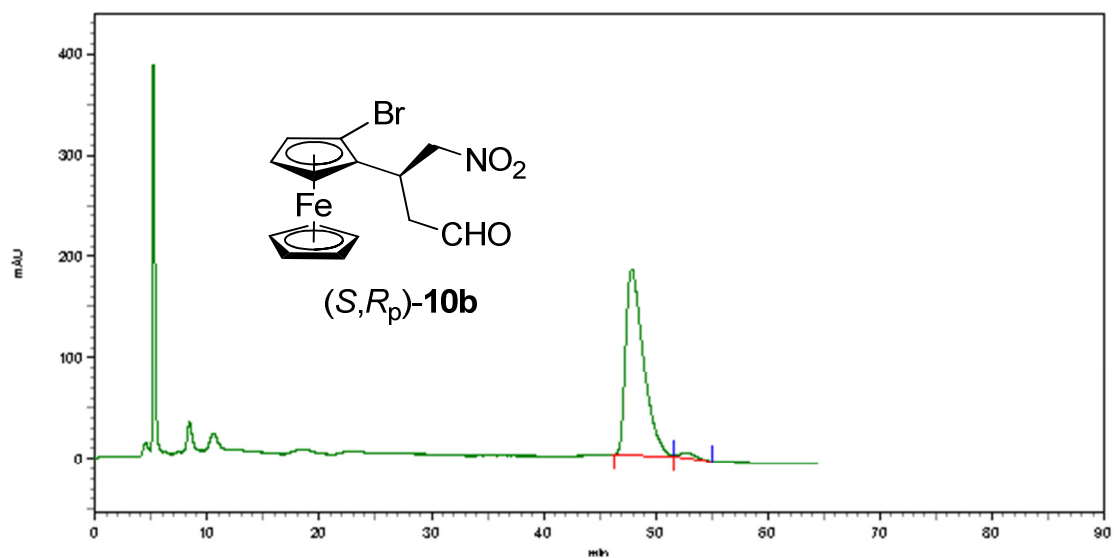

1: 220 nm, 8 nm

| retention time | area     | area% |
|----------------|----------|-------|
| 47.847         | 20273331 | 97.86 |
| 52.853         | 443006   | 2.14  |

|       |          |        |
|-------|----------|--------|
| Total | 20716337 | 100.00 |
|-------|----------|--------|

racemic sample

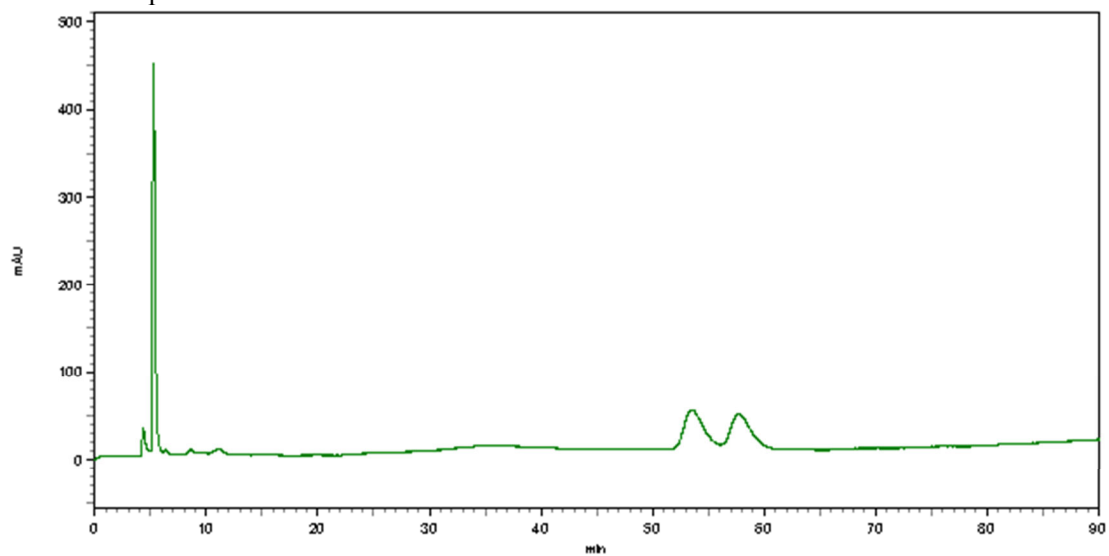



Chiralcel OD-H column, hexane/2-propanol = 90:10, 1.0 mL min<sup>-1</sup>

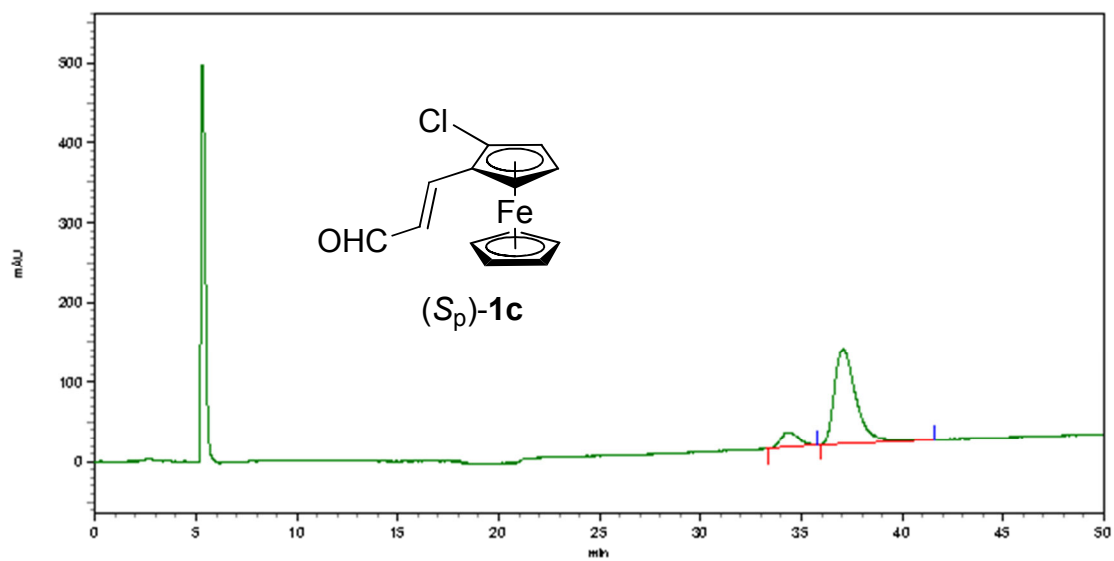

3: 210 nm, 8 nm

| retention time | area    | area%  |
|----------------|---------|--------|
| 34.338         | 1203082 | 12.10  |
| 37.077         | 8742391 | 87.90  |
| Total          | 9945472 | 100.00 |

racemic sample

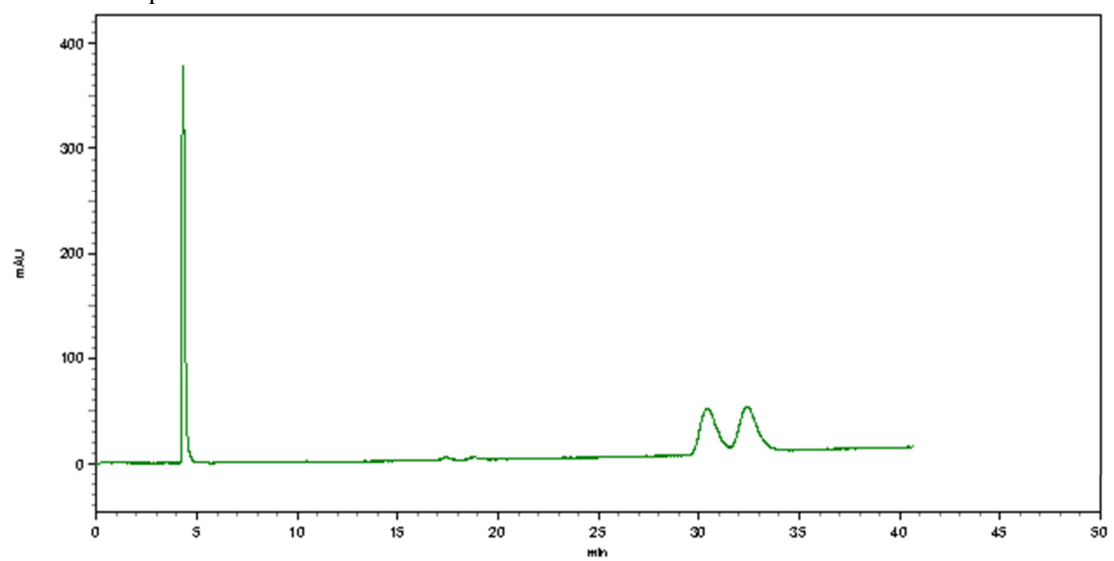

Chiralcel OJ-H column, hexane/2-propanol = 70:30, 0.8 mL min<sup>-1</sup>

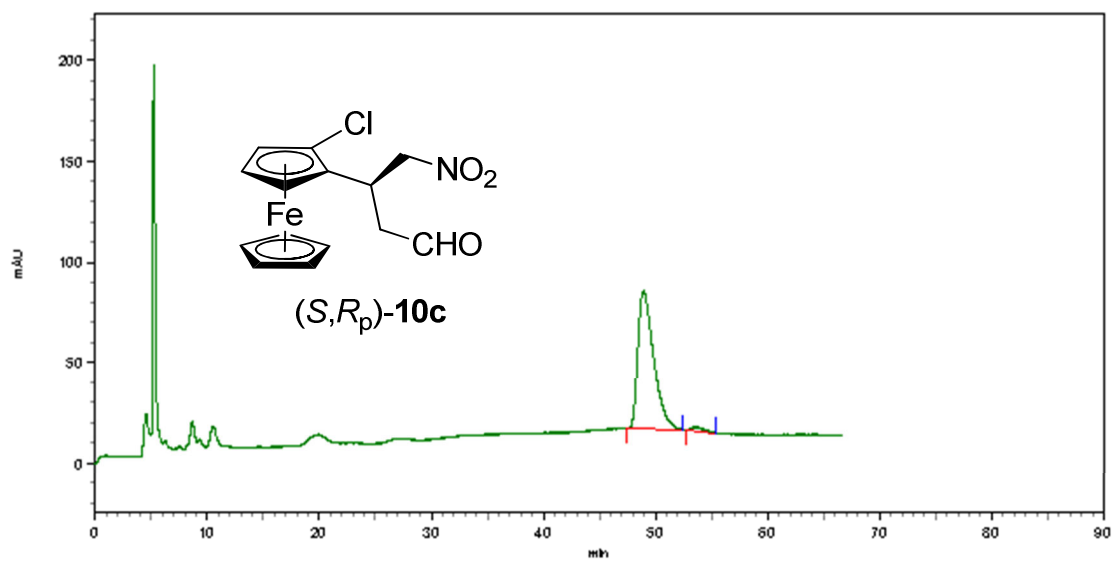

1: 225 nm, 8 nm

|       | retention time | area    | area%  |
|-------|----------------|---------|--------|
|       | 48.939         | 6695638 | 97.54  |
|       | 53.728         | 168933  | 2.46   |
| Total |                | 6864571 | 100.00 |

racemic sample

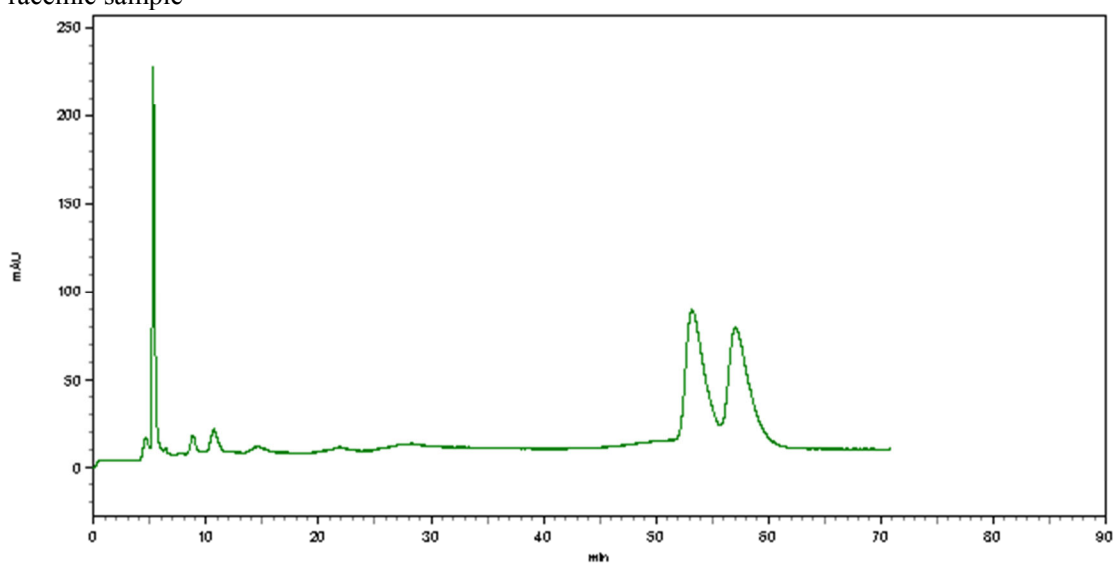

Chiralcel OD-H column, hexane/2-propanol = 90:10, 1.0 mL min<sup>-1</sup>

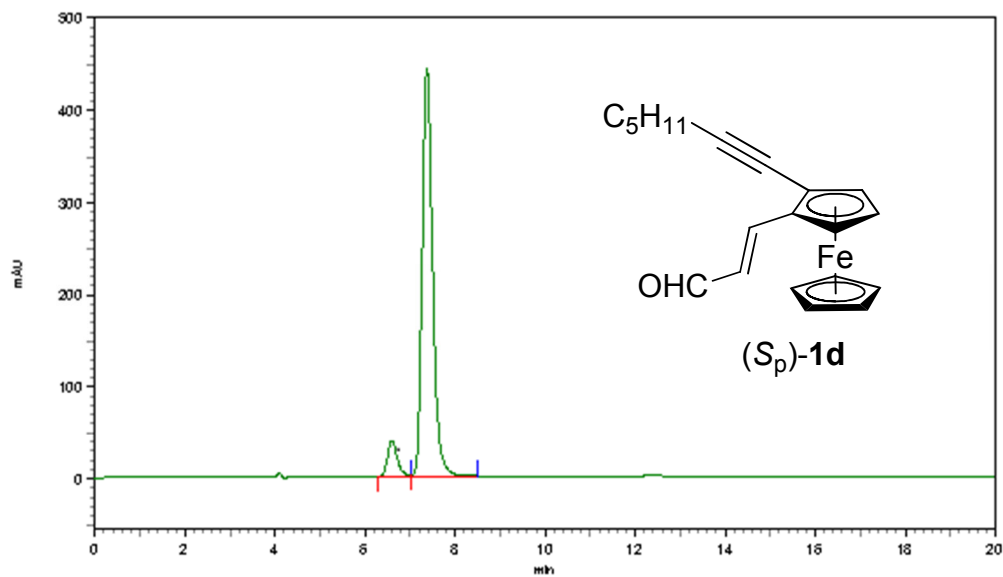

4: 310 nm, 8 nm

| retention time | area    | area%  |
|----------------|---------|--------|
| 6.590          | 565904  | 7.32   |
| 7.368          | 7162226 | 92.68  |
| Total          | 7728131 | 100.00 |

racemic sample

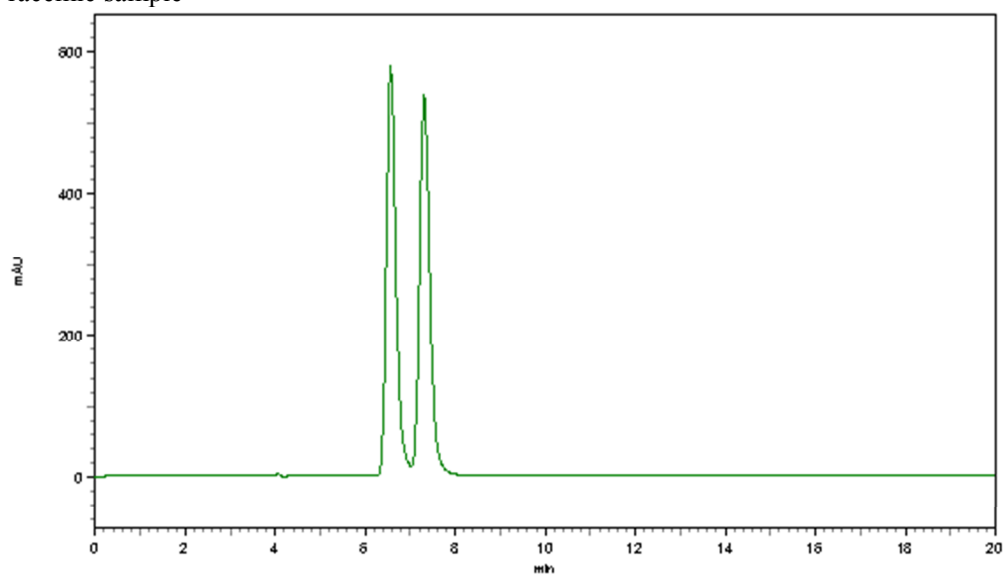

Chiralcel OJ-H column, hexane/2-propanol = 70:30, 0.8 mL min<sup>-1</sup>

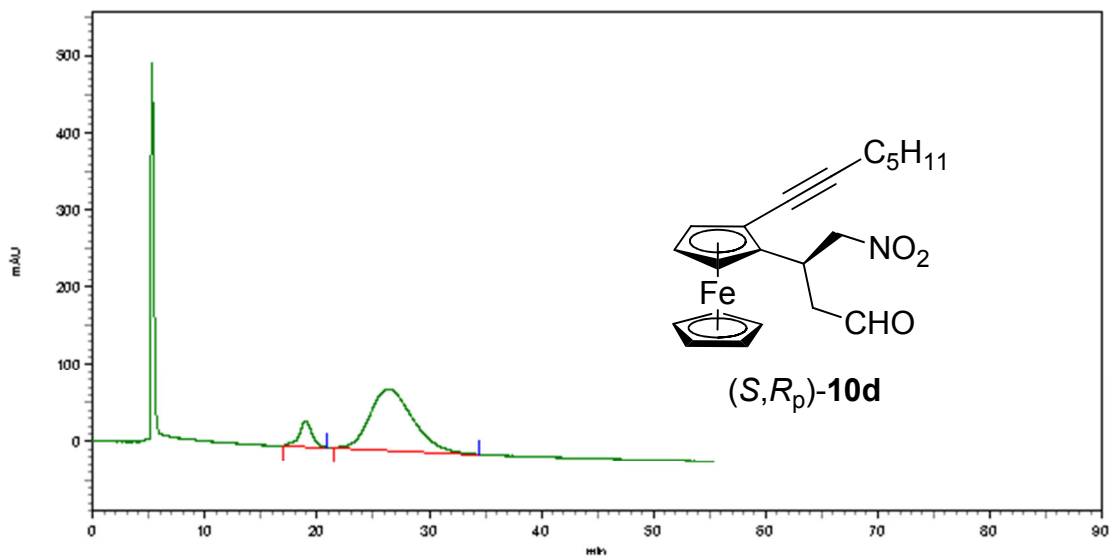

1: 220 nm, 8 nm

|       | retention time | area     | area%  |
|-------|----------------|----------|--------|
|       | 18.944         | 2542313  | 10.81  |
|       | 26.347         | 20976662 | 89.19  |
| Total |                | 23518975 | 100.00 |

racemic sample

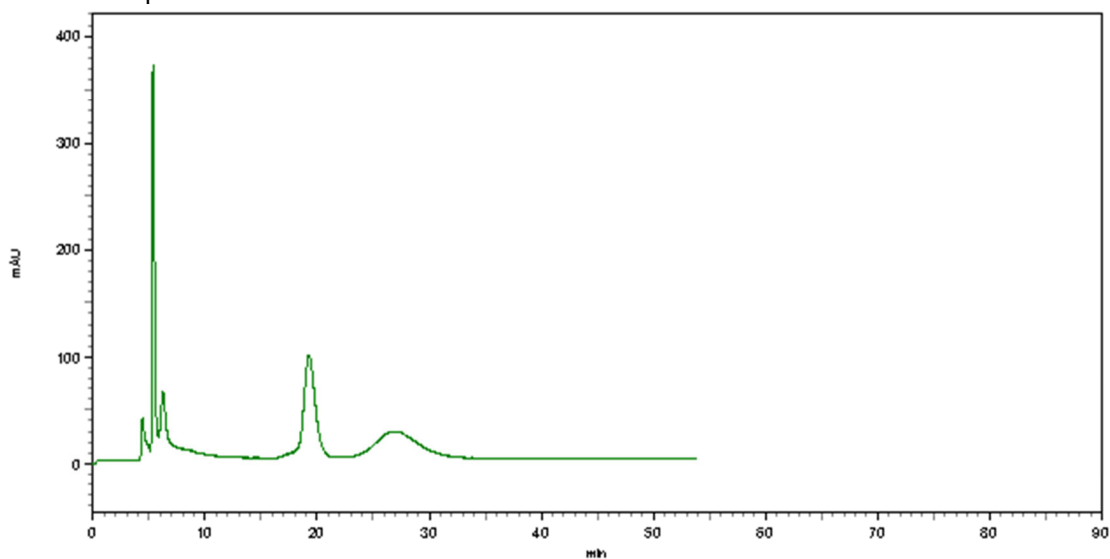

Chiralcel OD-H column, hexane/2-propanol = 90:10, 1.0 mL min<sup>-1</sup>

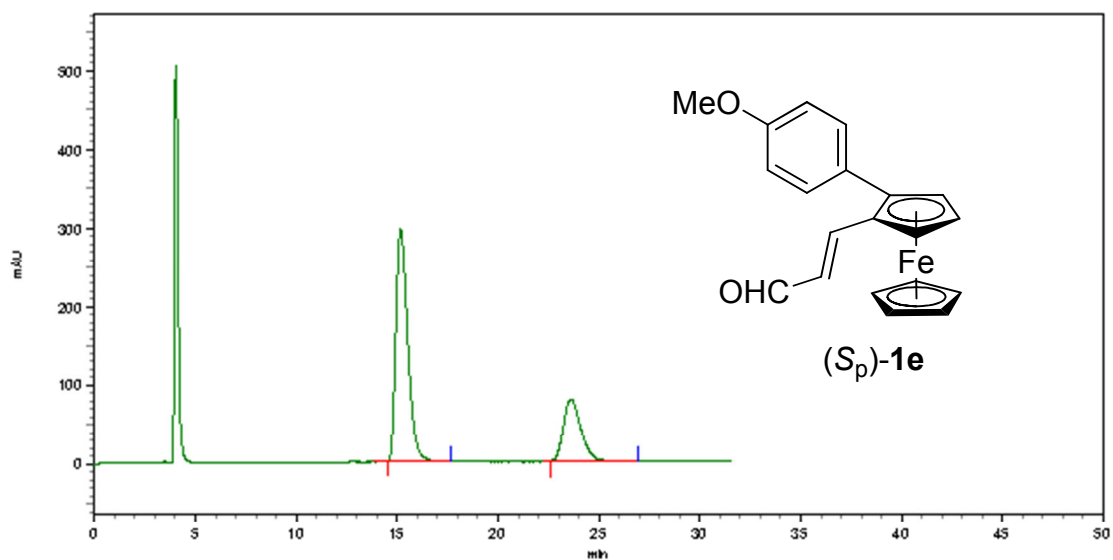

3: 210 nm, 8 nm

| retention time | area     | area%  |
|----------------|----------|--------|
| 15.165         | 12127471 | 71.55  |
| 23.592         | 4822672  | 28.45  |
| Total          | 16950143 | 100.00 |

racemic sample

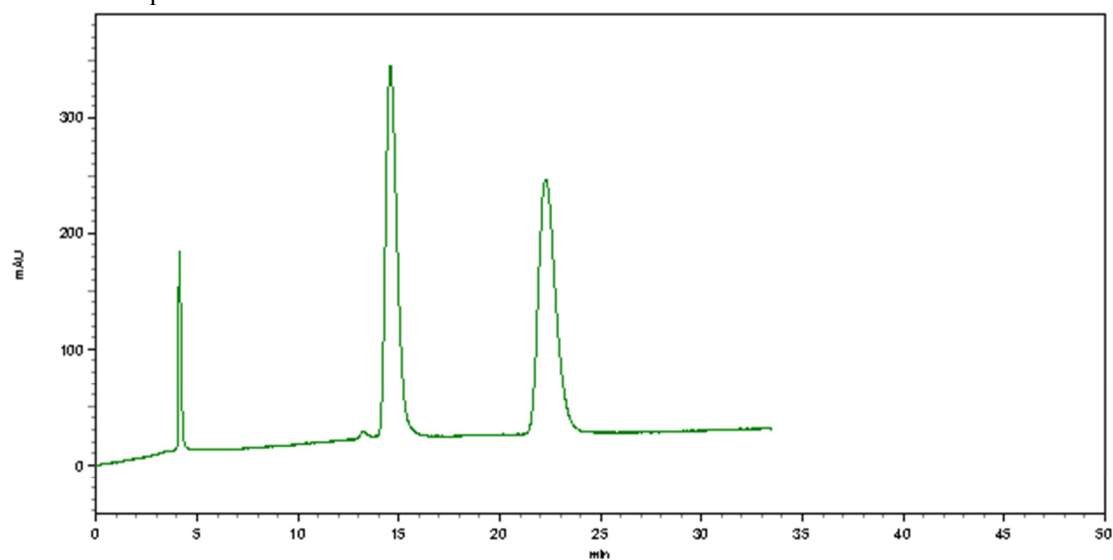

Chiralpak AS-H column, hexane/2-propanol = 70:30, 0.8 mL min<sup>-1</sup>

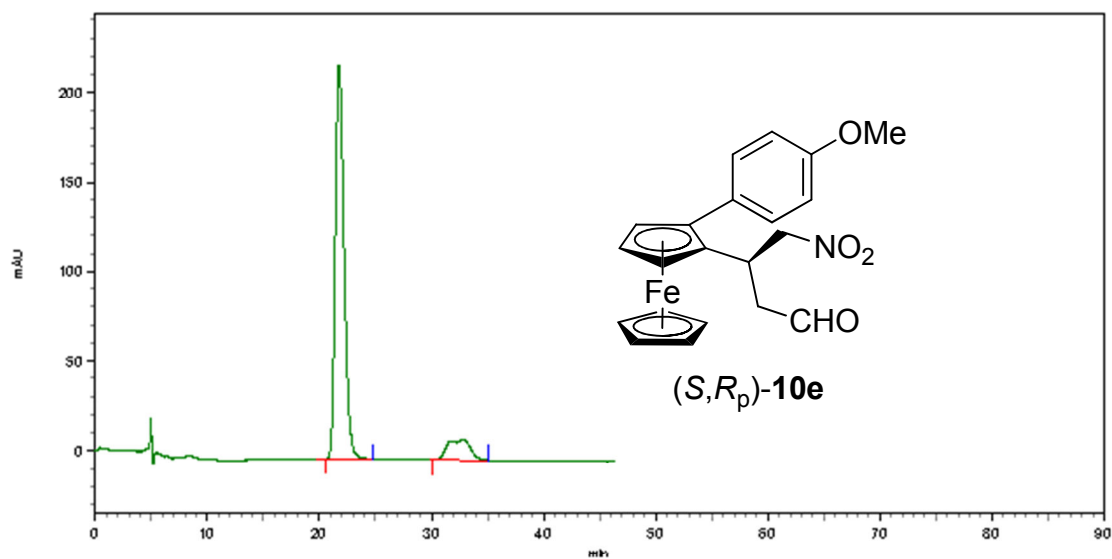

1: 254 nm, 8 nm

| retention time | area     | area%  |
|----------------|----------|--------|
| 21.749         | 11963065 | 88.03  |
| 32.835         | 1626596  | 11.97  |
| Total          | 13589660 | 100.00 |

The minor diastereomer could not be removed for this compound, and its peak overlapped with that of the minor enantiomer at around 32.8 min. The ee value was calculated based on the diastereomeric ratio determined by <sup>1</sup>H NMR analysis.

racemic sample

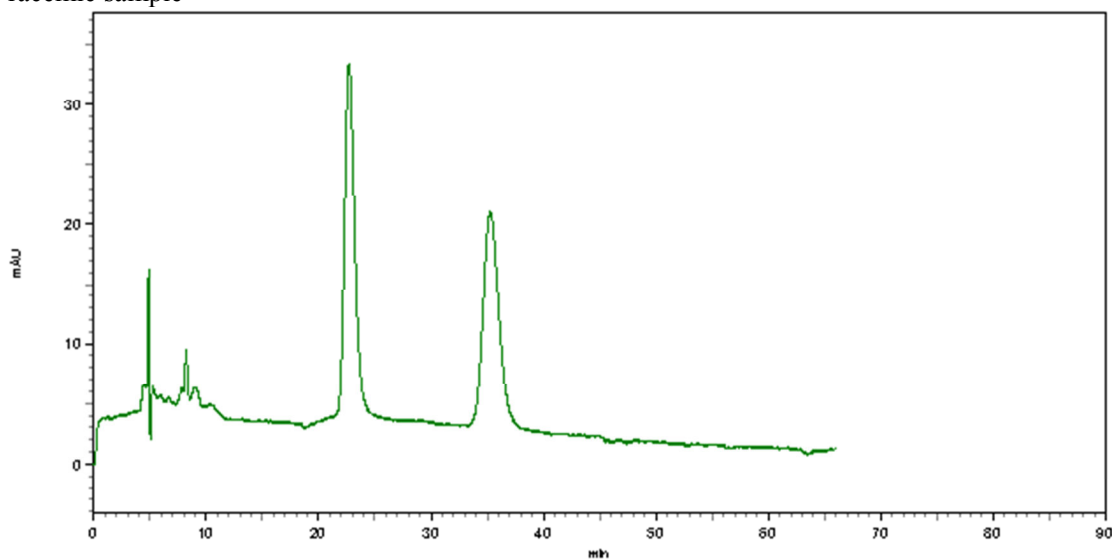

Chiralcel OD-H column, hexane/2-propanol = 90:10, 1.0 mL min<sup>-1</sup>

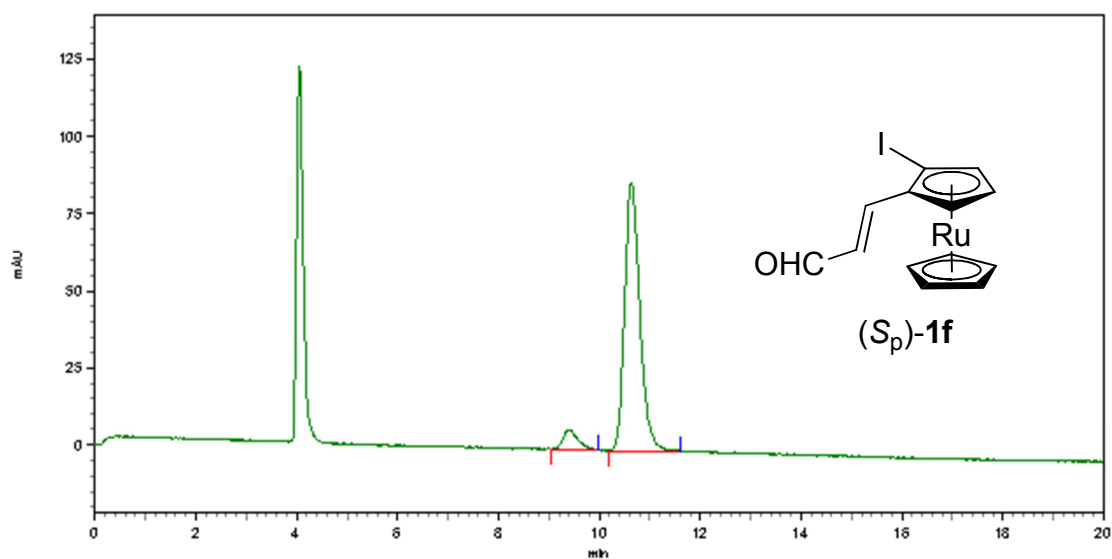

1: 225 nm, 8 nm

|       | retention time | area    | area%  |
|-------|----------------|---------|--------|
|       | 9.384          | 132254  | 6.72   |
|       | 10.629         | 1837154 | 93.28  |
| Total |                | 1969408 | 100.00 |

racemic sample

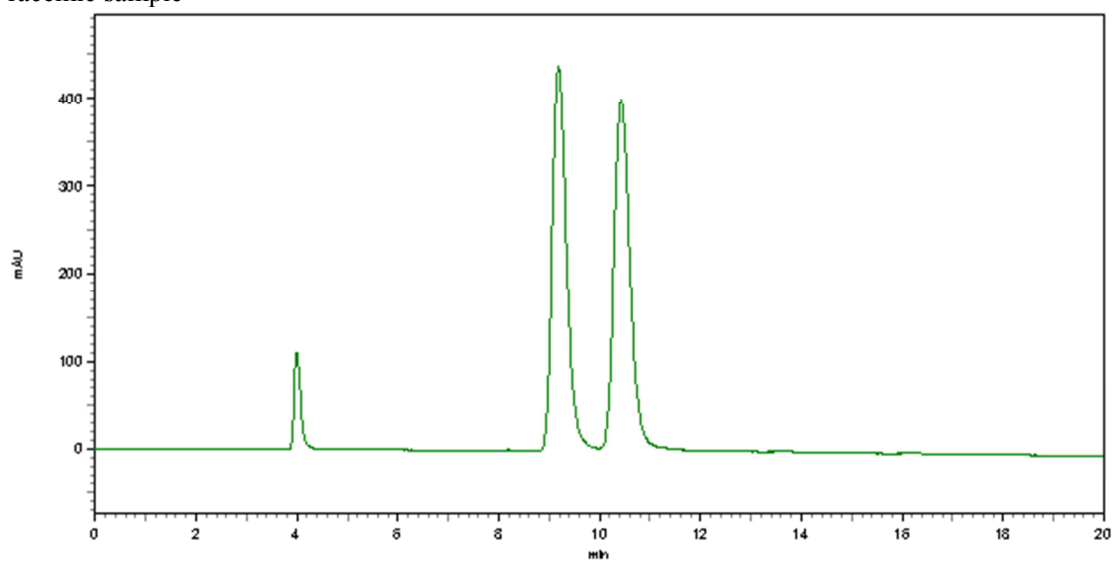

Chiralcel OJ-H column, hexane/2-propanol = 70:30, 0.8 mL min<sup>-1</sup>

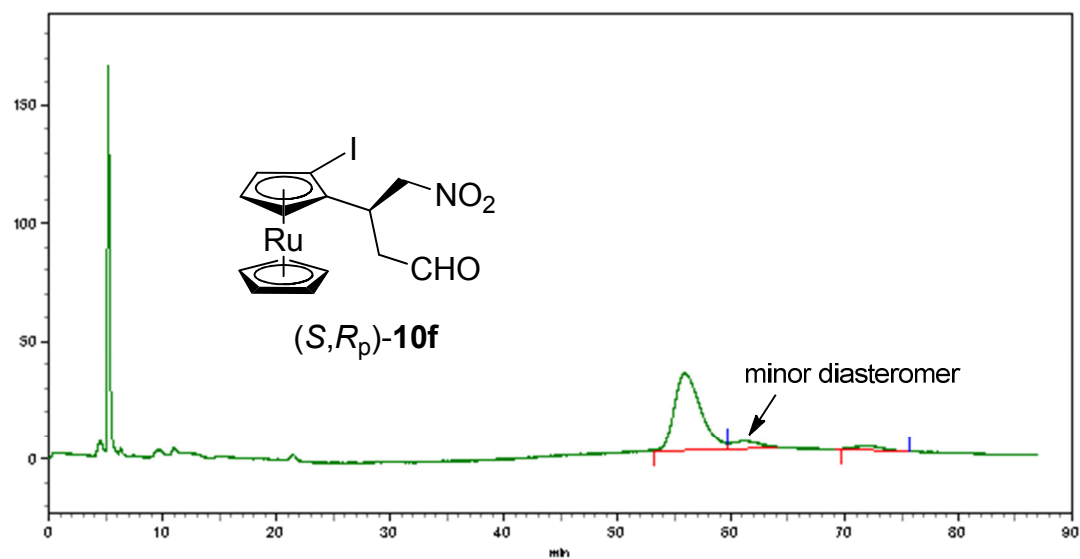

1: 225 nm, 8 nm

| retention time | area    | area%  |
|----------------|---------|--------|
| 55.973         | 5247547 | 93.70  |
| 72.032         | 352653  | 6.30   |
| Total          | 5600200 | 100.00 |

racemic sample

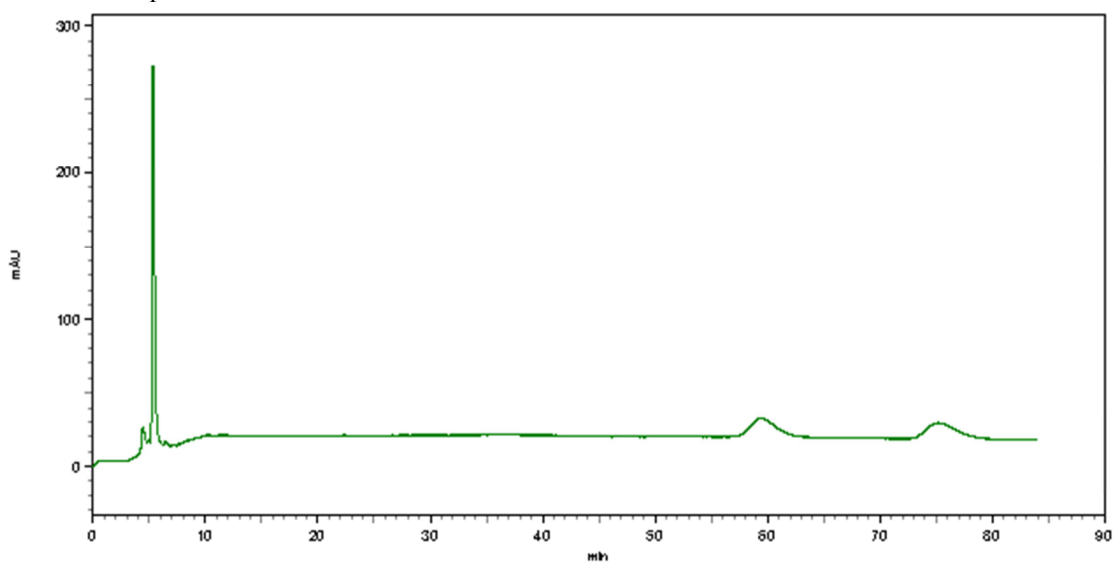

Supplement: c4cc03266g1.pdf [file c4cc03266g1.pdf]
